# Supplementary material for: A covalently linked dimer of [Ag25(DMBT)18]−
Source: Royal Society of Chemistry journal article supplement (doi:10.1039/c9cc01289c), 2019-01-01
Supplement: c9cc01289c1.pdf [file c9cc01289c1.pdf]

## A covalently linked dimer of $[\text{Ag}_{25}(\text{DMBT})_{18}]^{-}$

Mohammad Bodiuzzaman<sup>a</sup>, Abhijit Nag<sup>a</sup>, Raghu Narayanan Pradeep<sup>a</sup>, Ankush Chakraborty<sup>b</sup>, Ranjit Bag<sup>b</sup>, Ganesan Paramasivam<sup>a</sup>, Ganapati Natarajan<sup>a</sup> Govindasamy Sekar<sup>b</sup>, Sundargopal Ghosh<sup>b</sup> and Thalappil Pradeep<sup>\*a</sup>

<sup>a</sup> Department of Chemistry, DST Unit of Nanoscience (DST UNS) and Thematic Unit of Excellence (TUE), Indian Institute of Technology Madras, Chennai 600036, India

<sup>b</sup> Department of Chemistry, Indian Institute of Technology Madras, Chennai 600036, India

\*Email: pradeep@iitm.ac.in

### A Isomer

|    |              |              |              |
|----|--------------|--------------|--------------|
| Ag | 15.164230000 | 16.096740000 | 22.226480000 |
| Ag | 12.727850000 | 15.021010000 | 23.176390000 |
| Ag | 13.483520000 | 14.759360000 | 20.392940000 |
| Ag | 13.834040000 | 17.460790000 | 24.322190000 |
| Ag | 12.766070000 | 17.373320000 | 21.492310000 |
| Ag | 16.816960000 | 17.464530000 | 24.029390000 |
| Ag | 17.510780000 | 17.225240000 | 21.104580000 |
| Ag | 16.532310000 | 14.680470000 | 20.223010000 |
| Ag | 15.017160000 | 17.277320000 | 19.645320000 |
| Ag | 15.301200000 | 15.054980000 | 24.849740000 |
| Ag | 17.504840000 | 14.742200000 | 22.992020000 |
| Ag | 15.306640000 | 18.922330000 | 22.024170000 |
| Ag | 15.072930000 | 13.262430000 | 22.312620000 |
| Ag | 12.937960000 | 19.730660000 | 19.771280000 |
| Ag | 12.237750000 | 15.193050000 | 26.082070000 |
| Ag | 17.749090000 | 16.317370000 | 18.039410000 |
| Ag | 18.246000000 | 15.368660000 | 25.935960000 |
| Ag | 12.330530000 | 12.185950000 | 21.789460000 |

|    |              |              |              |
|----|--------------|--------------|--------------|
| Ag | 10.885850000 | 17.583970000 | 23.941020000 |
| Ag | 19.719310000 | 15.282100000 | 20.485830000 |
| Ag | 16.649170000 | 12.439860000 | 24.821290000 |
| Ag | 18.169040000 | 19.808590000 | 22.894040000 |
| Ag | 15.279850000 | 20.080140000 | 24.765440000 |
| Ag | 14.751890000 | 12.228000000 | 19.326800000 |
| Ag | 12.620650000 | 16.731030000 | 18.007390000 |
| S  | 17.431570000 | 21.220870000 | 24.745850000 |
| S  | 11.231740000 | 13.081360000 | 23.764470000 |
| S  | 18.293530000 | 17.796590000 | 26.105620000 |
| S  | 15.594190000 | 17.105950000 | 17.199110000 |
| S  | 12.595820000 | 14.299940000 | 18.092730000 |
| S  | 14.176100000 | 13.876870000 | 26.764140000 |
| S  | 12.949990000 | 19.617570000 | 25.324230000 |
| S  | 14.077450000 | 21.050910000 | 21.517980000 |
| S  | 10.054550000 | 16.236190000 | 25.790180000 |
| S  | 15.085490000 | 11.060560000 | 23.549490000 |
| S  | 10.833360000 | 18.957060000 | 21.910190000 |
| S  | 16.615970000 | 13.287750000 | 18.142030000 |
| S  | 20.006530000 | 14.562790000 | 22.809970000 |
| S  | 19.580710000 | 18.671870000 | 21.244060000 |
| S  | 12.247420000 | 19.085840000 | 17.514690000 |
| S  | 20.044840000 | 15.481990000 | 18.080870000 |
| S  | 18.480420000 | 12.981760000 | 26.344100000 |
| S  | 12.823560000 | 10.825250000 | 19.841590000 |
| C  | 17.072770000 | 22.819540000 | 24.011830000 |
| C  | 18.127400000 | 23.617700000 | 23.481190000 |

|   |              |              |              |
|---|--------------|--------------|--------------|
| C | 17.807920000 | 24.879740000 | 22.938350000 |
| C | 16.492670000 | 25.387990000 | 22.903470000 |
| C | 15.467940000 | 24.592680000 | 23.463070000 |
| C | 15.753200000 | 23.331390000 | 24.008260000 |
| C | 19.550890000 | 23.118810000 | 23.440030000 |
| C | 16.181850000 | 26.707320000 | 22.234680000 |
| C | 9.557960000  | 13.426240000 | 23.211260000 |
| C | 8.570610000  | 12.401930000 | 23.321360000 |
| C | 7.237510000  | 12.723900000 | 22.986290000 |
| C | 6.842970000  | 14.008560000 | 22.550890000 |
| C | 7.840670000  | 15.000140000 | 22.432030000 |
| C | 9.175260000  | 14.705680000 | 22.749750000 |
| C | 8.928510000  | 11.005490000 | 23.769850000 |
| C | 5.403610000  | 14.303260000 | 22.189850000 |
| C | 15.871290000 | 18.740260000 | 16.518820000 |
| C | 16.248000000 | 18.850850000 | 15.146650000 |
| C | 16.410390000 | 20.143030000 | 14.601390000 |
| C | 16.192640000 | 21.323090000 | 15.347770000 |
| C | 15.800370000 | 21.187190000 | 16.697640000 |
| C | 15.652490000 | 19.914690000 | 17.273690000 |
| C | 16.431170000 | 17.627290000 | 14.280000000 |
| C | 16.390540000 | 22.687780000 | 14.723710000 |
| C | 10.853590000 | 13.874950000 | 18.166660000 |
| C | 10.117850000 | 13.764200000 | 16.947240000 |
| C | 8.771640000  | 13.348670000 | 17.016790000 |
| C | 8.127760000  | 13.025960000 | 18.233450000 |
| C | 8.873290000  | 13.148920000 | 19.424630000 |

|   |              |              |              |
|---|--------------|--------------|--------------|
| C | 10.211870000 | 13.574630000 | 19.387240000 |
| C | 10.754370000 | 14.064970000 | 15.611740000 |
| C | 6.688600000  | 12.557300000 | 18.250720000 |
| C | 14.635660000 | 14.632090000 | 28.324360000 |
| C | 14.057480000 | 14.123470000 | 29.527680000 |
| C | 14.475790000 | 14.676960000 | 30.756120000 |
| C | 15.440890000 | 15.705460000 | 30.845830000 |
| C | 15.991230000 | 16.198150000 | 29.642490000 |
| C | 15.594240000 | 15.667070000 | 28.403460000 |
| C | 13.041070000 | 13.007670000 | 29.499830000 |
| C | 15.889870000 | 16.232600000 | 32.191490000 |
| C | 13.027510000 | 19.494750000 | 27.112760000 |
| C | 12.891700000 | 20.675970000 | 27.899510000 |
| C | 12.855460000 | 20.539680000 | 29.304630000 |
| C | 12.941910000 | 19.291190000 | 29.955500000 |
| C | 13.088050000 | 18.137920000 | 29.153680000 |
| C | 13.135680000 | 18.242010000 | 27.756720000 |
| C | 12.800700000 | 22.043150000 | 27.265170000 |
| C | 12.846410000 | 19.176220000 | 31.460680000 |
| C | 15.150910000 | 22.124750000 | 20.569080000 |
| C | 14.605360000 | 23.289190000 | 19.946140000 |
| C | 15.482090000 | 24.147490000 | 19.246930000 |
| C | 16.872310000 | 23.911410000 | 19.150470000 |
| C | 17.390220000 | 22.761810000 | 19.784980000 |
| C | 16.540000000 | 21.881850000 | 20.472280000 |
| C | 13.129360000 | 23.597080000 | 20.015010000 |
| C | 17.770240000 | 24.827180000 | 18.347730000 |

|   |              |              |              |
|---|--------------|--------------|--------------|
| C | 9.776200000  | 17.383110000 | 27.137840000 |
| C | 9.660780000  | 16.897130000 | 28.473140000 |
| C | 9.340680000  | 17.815380000 | 29.496030000 |
| C | 9.127350000  | 19.188480000 | 29.255960000 |
| C | 9.232960000  | 19.645660000 | 27.922860000 |
| C | 9.551580000  | 18.757990000 | 26.883640000 |
| C | 9.903990000  | 15.446890000 | 28.807170000 |
| C | 8.836860000  | 20.142950000 | 30.393020000 |
| C | 16.248680000 | 9.931440000  | 22.773570000 |
| C | 16.601240000 | 8.722360000  | 23.447230000 |
| C | 17.477750000 | 7.824360000  | 22.798620000 |
| C | 18.010180000 | 8.066280000  | 21.512760000 |
| C | 17.649340000 | 9.269660000  | 20.869100000 |
| C | 16.790440000 | 10.187740000 | 21.493620000 |
| C | 16.074080000 | 8.405610000  | 24.826250000 |
| C | 18.921000000 | 7.068850000  | 20.830490000 |
| C | 9.429280000  | 18.305460000 | 21.003680000 |
| C | 8.152750000  | 18.919870000 | 21.174020000 |
| C | 7.070820000  | 18.436190000 | 20.406220000 |
| C | 7.202360000  | 17.379170000 | 19.478870000 |
| C | 8.477120000  | 16.792560000 | 19.323750000 |
| C | 9.569550000  | 17.248120000 | 20.076360000 |
| C | 7.948410000  | 20.051880000 | 22.151810000 |
| C | 6.015550000  | 16.861090000 | 18.697030000 |
| C | 18.001660000 | 12.160560000 | 18.242930000 |
| C | 18.222910000 | 11.246830000 | 17.169910000 |
| C | 19.373910000 | 10.429330000 | 17.216570000 |

|   |              |              |              |
|---|--------------|--------------|--------------|
| C | 20.311700000 | 10.484340000 | 18.270470000 |
| C | 20.061910000 | 11.384850000 | 19.329580000 |
| C | 18.921900000 | 12.202110000 | 19.315020000 |
| C | 17.259030000 | 11.141800000 | 16.011780000 |
| C | 21.557790000 | 9.625600000  | 18.262710000 |
| C | 20.621620000 | 12.883960000 | 22.726030000 |
| C | 21.983050000 | 12.644500000 | 22.367650000 |
| C | 22.464120000 | 11.319350000 | 22.404900000 |
| C | 21.658900000 | 10.223140000 | 22.790840000 |
| C | 20.313850000 | 10.483420000 | 23.129680000 |
| C | 19.803610000 | 11.791320000 | 23.087900000 |
| C | 22.895970000 | 13.769490000 | 21.944390000 |
| C | 22.229960000 | 8.823740000  | 22.852770000 |
| C | 19.768900000 | 19.798310000 | 19.868730000 |
| C | 20.816700000 | 20.766650000 | 19.908970000 |
| C | 21.011300000 | 21.582400000 | 18.775260000 |
| C | 20.234060000 | 21.457570000 | 17.600960000 |
| C | 19.200870000 | 20.496260000 | 17.589470000 |
| C | 18.967030000 | 19.684960000 | 18.712120000 |
| C | 21.732450000 | 20.894880000 | 21.105530000 |
| C | 20.534090000 | 22.302780000 | 16.383880000 |
| C | 10.486560000 | 19.150810000 | 17.177770000 |
| C | 9.649740000  | 20.216600000 | 17.620270000 |
| C | 8.305910000  | 20.234020000 | 17.187580000 |
| C | 7.759780000  | 19.263340000 | 16.320950000 |
| C | 8.611570000  | 18.224090000 | 15.885660000 |
| C | 9.946500000  | 18.167620000 | 16.313180000 |

|   |              |              |              |
|---|--------------|--------------|--------------|
| C | 10.160730000 | 21.318920000 | 18.513620000 |
| C | 6.326650000  | 19.359930000 | 15.844960000 |
| C | 21.127310000 | 16.864690000 | 17.736490000 |
| C | 21.167230000 | 17.434540000 | 16.429740000 |
| C | 22.128190000 | 18.435710000 | 16.162650000 |
| C | 23.051640000 | 18.898310000 | 17.124290000 |
| C | 22.984580000 | 18.325810000 | 18.415400000 |
| C | 22.038540000 | 17.333520000 | 18.711040000 |
| C | 20.199800000 | 17.005770000 | 15.354190000 |
| C | 24.059680000 | 19.980500000 | 16.805750000 |
| C | 17.772100000 | 12.592480000 | 27.946710000 |
| C | 18.260600000 | 13.201870000 | 29.139520000 |
| C | 17.725810000 | 12.777170000 | 30.375310000 |
| C | 16.748180000 | 11.767700000 | 30.485920000 |
| C | 16.287870000 | 11.167820000 | 29.292520000 |
| C | 16.784530000 | 11.580550000 | 28.047520000 |
| C | 19.304370000 | 14.290790000 | 29.110100000 |
| C | 16.204860000 | 11.345190000 | 31.832470000 |
| C | 13.368710000 | 9.267100000  | 20.532890000 |
| C | 14.230980000 | 8.404560000  | 19.792990000 |
| C | 14.551720000 | 7.148040000  | 20.348440000 |
| C | 14.051230000 | 6.703690000  | 21.590540000 |
| C | 13.184590000 | 7.567710000  | 22.296250000 |
| C | 12.852040000 | 8.827810000  | 21.775920000 |
| C | 14.808840000 | 8.808470000  | 18.459620000 |
| C | 14.465880000 | 5.367660000  | 22.163380000 |
| H | 18.630470000 | 25.490460000 | 22.511840000 |

|   |              |              |              |
|---|--------------|--------------|--------------|
| H | 14.422780000 | 24.960940000 | 23.466280000 |
| H | 14.933140000 | 22.710070000 | 24.423460000 |
| H | 19.917510000 | 22.818430000 | 24.450180000 |
| H | 20.231680000 | 23.894910000 | 23.024170000 |
| H | 19.623000000 | 22.208650000 | 22.793980000 |
| H | 17.075190000 | 27.369640000 | 22.193040000 |
| H | 15.366550000 | 27.254180000 | 22.760040000 |
| H | 15.841350000 | 26.539270000 | 21.184390000 |
| H | 6.466940000  | 11.930770000 | 23.080240000 |
| H | 7.576680000  | 16.016870000 | 22.079900000 |
| H | 9.948970000  | 15.494100000 | 22.640860000 |
| H | 9.618240000  | 10.519670000 | 23.038070000 |
| H | 8.020500000  | 10.370450000 | 23.865590000 |
| H | 9.467030000  | 11.016080000 | 24.745040000 |
| H | 5.211730000  | 14.110760000 | 21.106180000 |
| H | 5.145820000  | 15.368370000 | 22.384090000 |
| H | 4.696260000  | 13.664340000 | 22.765020000 |
| H | 16.706840000 | 20.228310000 | 13.534500000 |
| H | 15.615910000 | 22.085590000 | 17.319490000 |
| H | 15.352670000 | 19.828210000 | 18.338360000 |
| H | 17.131120000 | 16.895320000 | 14.746430000 |
| H | 16.822600000 | 17.904140000 | 13.276470000 |
| H | 15.466160000 | 17.083390000 | 14.147180000 |
| H | 17.446880000 | 23.037720000 | 14.831010000 |
| H | 15.743040000 | 23.453000000 | 15.208240000 |
| H | 16.159720000 | 22.677500000 | 13.634580000 |
| H | 8.203720000  | 13.262020000 | 16.066700000 |



|   |              |              |              |
|---|--------------|--------------|--------------|
| H | 8.402090000  | 12.925350000 | 20.401680000 |
| H | 10.776790000 | 13.686410000 | 20.335930000 |
| H | 11.246480000 | 15.066170000 | 15.611690000 |
| H | 9.999960000  | 14.035540000 | 14.794760000 |
| H | 11.559900000 | 13.331590000 | 15.372420000 |
| H | 6.007250000  | 13.301470000 | 17.775190000 |
| H | 6.335950000  | 12.383220000 | 19.291250000 |
| H | 6.563980000  | 11.602010000 | 17.687850000 |
| H | 14.030120000 | 14.271510000 | 31.689320000 |
| H | 16.732730000 | 17.022170000 | 29.663520000 |
| H | 16.033260000 | 16.069910000 | 27.467590000 |
| H | 12.162260000 | 13.269120000 | 28.864200000 |
| H | 12.677620000 | 12.773360000 | 30.524790000 |
| H | 13.479190000 | 12.084720000 | 29.052890000 |
| H | 15.044830000 | 16.296300000 | 32.915030000 |
| H | 16.344210000 | 17.244200000 | 32.100760000 |
| H | 16.656430000 | 15.562330000 | 32.650730000 |
| H | 12.753760000 | 21.459160000 | 29.918190000 |
| H | 13.169820000 | 17.141100000 | 29.629610000 |
| H | 13.248170000 | 17.326090000 | 27.137850000 |
| H | 13.730570000 | 22.283790000 | 26.694800000 |
| H | 12.652660000 | 22.829990000 | 28.037950000 |
| H | 11.962290000 | 22.099760000 | 26.532410000 |
| H | 13.051000000 | 20.147430000 | 31.963390000 |
| H | 13.564950000 | 18.422230000 | 31.855990000 |
| H | 11.826200000 | 18.845600000 | 31.771530000 |
| H | 15.050750000 | 25.042300000 | 18.750110000 |

|   |              |              |              |
|---|--------------|--------------|--------------|
| H | 18.473180000 | 22.537710000 | 19.726780000 |
| H | 16.959710000 | 20.969500000 | 20.948980000 |
| H | 12.527430000 | 22.756900000 | 19.593840000 |
| H | 12.886590000 | 24.522790000 | 19.448080000 |
| H | 12.786370000 | 23.722860000 | 21.068890000 |
| H | 17.759330000 | 24.549030000 | 17.265830000 |
| H | 18.826430000 | 24.760580000 | 18.692770000 |
| H | 17.445860000 | 25.890390000 | 18.417040000 |
| H | 9.252040000  | 17.432770000 | 30.533990000 |
| H | 9.066600000  | 20.717040000 | 27.691280000 |
| H | 9.644540000  | 19.137280000 | 25.845810000 |
| H | 9.243670000  | 14.767040000 | 28.220290000 |
| H | 9.746740000  | 15.251850000 | 29.890460000 |
| H | 10.953290000 | 15.157040000 | 28.549220000 |
| H | 8.523700000  | 19.598250000 | 31.311680000 |
| H | 8.031990000  | 20.867190000 | 30.130790000 |
| H | 9.742840000  | 20.742420000 | 30.651840000 |
| H | 17.758690000 | 6.892420000  | 23.333270000 |
| H | 18.059170000 | 9.505990000  | 19.868230000 |
| H | 16.528590000 | 11.135610000 | 20.975890000 |
| H | 16.444880000 | 9.145840000  | 25.576160000 |
| H | 16.397660000 | 7.392220000  | 25.152370000 |
| H | 14.960820000 | 8.455720000  | 24.856410000 |
| H | 19.509340000 | 6.473690000  | 21.564820000 |
| H | 19.634220000 | 7.577740000  | 20.143490000 |
| H | 18.337440000 | 6.342530000  | 20.215110000 |
| H | 6.080110000  | 18.919400000 | 20.540600000 |

|   |              |              |              |
|---|--------------|--------------|--------------|
| H | 8.623170000  | 15.963000000 | 18.605610000 |
| H | 10.562890000 | 16.771300000 | 19.940880000 |
| H | 8.162900000  | 19.724590000 | 23.197360000 |
| H | 6.902320000  | 20.428550000 | 22.112460000 |
| H | 8.640210000  | 20.901130000 | 21.943470000 |
| H | 5.502740000  | 16.036070000 | 19.248320000 |
| H | 6.335150000  | 16.451710000 | 17.712370000 |
| H | 5.257920000  | 17.656740000 | 18.517420000 |
| H | 19.544930000 | 9.721410000  | 16.379060000 |
| H | 20.757760000 | 11.440490000 | 20.188760000 |
| H | 18.723170000 | 12.884510000 | 20.167900000 |
| H | 16.227140000 | 10.907110000 | 16.363540000 |
| H | 17.578940000 | 10.346080000 | 15.303910000 |
| H | 17.182150000 | 12.103550000 | 15.453840000 |
| H | 21.798170000 | 9.243760000  | 19.281490000 |
| H | 22.445350000 | 10.212470000 | 17.922780000 |
| H | 21.452430000 | 8.753810000  | 17.578230000 |
| H | 23.521550000 | 11.138490000 | 22.118180000 |
| H | 19.641260000 | 9.651980000  | 23.418350000 |
| H | 18.739620000 | 11.974560000 | 23.343820000 |
| H | 22.445130000 | 14.344720000 | 21.097900000 |
| H | 23.886290000 | 13.380100000 | 21.618800000 |
| H | 23.052100000 | 14.497720000 | 22.775710000 |
| H | 22.796590000 | 8.564680000  | 21.928230000 |
| H | 21.425920000 | 8.066990000  | 22.983920000 |
| H | 22.939920000 | 8.712490000  | 23.707250000 |
| H | 21.820460000 | 22.342410000 | 18.809880000 |

|   |              |              |              |
|---|--------------|--------------|--------------|
| H | 18.556510000 | 20.380320000 | 16.695990000 |
| H | 18.147200000 | 18.936610000 | 18.693770000 |
| H | 21.154710000 | 20.927360000 | 22.059010000 |
| H | 22.358680000 | 21.812600000 | 21.030430000 |
| H | 22.414530000 | 20.013090000 | 21.185300000 |
| H | 20.669350000 | 23.377060000 | 16.647000000 |
| H | 19.717160000 | 22.229030000 | 15.633050000 |
| H | 21.476430000 | 21.964220000 | 15.889150000 |
| H | 7.654330000  | 21.056820000 | 17.548970000 |
| H | 8.225490000  | 17.441150000 | 15.202110000 |
| H | 10.603980000 | 17.347450000 | 15.962220000 |
| H | 10.569810000 | 20.912880000 | 19.471390000 |
| H | 9.349010000  | 22.038600000 | 18.761670000 |
| H | 10.989110000 | 21.882930000 | 18.023410000 |
| H | 5.656010000  | 19.756270000 | 16.640700000 |
| H | 5.934390000  | 18.367850000 | 15.527590000 |
| H | 6.237480000  | 20.047290000 | 14.969360000 |
| H | 22.155820000 | 18.873050000 | 15.143330000 |
| H | 23.682900000 | 18.674970000 | 19.202600000 |
| H | 21.965220000 | 16.903670000 | 19.729610000 |
| H | 20.248140000 | 15.907130000 | 15.171610000 |
| H | 20.397730000 | 17.539150000 | 14.398270000 |
| H | 19.148530000 | 17.225320000 | 15.665270000 |
| H | 24.048140000 | 20.246090000 | 15.726050000 |
| H | 25.098880000 | 19.663570000 | 17.056830000 |
| H | 23.848180000 | 20.906940000 | 17.392320000 |
| H | 18.094860000 | 13.265280000 | 31.301130000 |

|   |              |              |              |
|---|--------------|--------------|--------------|
| H | 15.521130000 | 10.368030000 | 29.336350000 |
| H | 16.391040000 | 11.115590000 | 27.120360000 |
| H | 20.249360000 | 13.941360000 | 28.631830000 |
| H | 19.536010000 | 14.647640000 | 30.137970000 |
| H | 18.949050000 | 15.164620000 | 28.508200000 |
| H | 16.593890000 | 10.344430000 | 32.137890000 |
| H | 15.093480000 | 11.269200000 | 31.813780000 |
| H | 16.483660000 | 12.070260000 | 32.629000000 |
| H | 15.228840000 | 6.482760000  | 19.772840000 |
| H | 12.756590000 | 7.249250000  | 23.268060000 |
| H | 12.175720000 | 9.498260000  | 22.343840000 |
| H | 14.010000000 | 9.065260000  | 17.725660000 |
| H | 15.438310000 | 7.995830000  | 18.034270000 |
| H | 15.447460000 | 9.721690000  | 18.561180000 |
| H | 14.760320000 | 4.652710000  | 21.362740000 |
| H | 13.647820000 | 4.903050000  | 22.758300000 |
| H | 15.343980000 | 5.482560000  | 22.843450000 |
| C | 20.000260000 | 18.468200000 | 26.308200000 |
| H | 20.326790000 | 18.191370000 | 27.338910000 |
| H | 19.852950000 | 19.577360000 | 26.304580000 |
| C | 21.117790000 | 18.138540000 | 25.335380000 |
| C | 20.916670000 | 17.563030000 | 24.068740000 |
| C | 22.450870000 | 18.449910000 | 25.689190000 |
| C | 22.006540000 | 17.381920000 | 23.200910000 |
| N | 23.515610000 | 18.276230000 | 24.866470000 |
| C | 23.303030000 | 17.759820000 | 23.598160000 |
| H | 22.682110000 | 18.862270000 | 26.690690000 |

|   |              |              |              |
|---|--------------|--------------|--------------|
| H | 21.823340000 | 16.931650000 | 22.208870000 |
| C | 24.501090000 | 17.626790000 | 22.736490000 |
| N | 25.703090000 | 18.047040000 | 23.275440000 |
| C | 26.858790000 | 17.839930000 | 22.561320000 |
| H | 27.796300000 | 18.179750000 | 23.044390000 |
| C | 26.912310000 | 17.211020000 | 21.293130000 |
| C | 25.659680000 | 16.867940000 | 20.724190000 |
| H | 25.622140000 | 16.407890000 | 19.715640000 |
| C | 24.472780000 | 17.066300000 | 21.442070000 |
| H | 23.512890000 | 16.761170000 | 20.992990000 |
| H | 26.250950000 | 13.498990000 | 25.387160000 |
| C | 26.101900000 | 14.396620000 | 26.015350000 |
| C | 26.078850000 | 14.324020000 | 27.427150000 |
| C | 25.937710000 | 15.643290000 | 25.401910000 |
| C | 25.878480000 | 15.501690000 | 28.155800000 |
| N | 25.757700000 | 16.802270000 | 26.097350000 |
| C | 25.711640000 | 16.737460000 | 27.483280000 |
| H | 26.214390000 | 13.357560000 | 27.948810000 |
| H | 25.960730000 | 15.742080000 | 24.300800000 |
| H | 25.849880000 | 15.469290000 | 29.260430000 |
| C | 25.468750000 | 18.015270000 | 28.153160000 |
| N | 25.289980000 | 19.103300000 | 27.306910000 |
| C | 25.018880000 | 20.317180000 | 27.868090000 |
| H | 24.873050000 | 21.149520000 | 27.154450000 |
| C | 24.926860000 | 20.526040000 | 29.247690000 |
| C | 25.117610000 | 19.425310000 | 30.116210000 |
| H | 25.051630000 | 19.551350000 | 31.213350000 |

|    |              |              |              |
|----|--------------|--------------|--------------|
| C  | 25.386890000 | 18.171960000 | 29.558020000 |
| H  | 25.540040000 | 17.297850000 | 30.217610000 |
| C  | 29.900500000 | 18.976290000 | 25.614290000 |
| C  | 30.157150000 | 20.293070000 | 25.169820000 |
| C  | 28.575180000 | 18.532660000 | 25.674360000 |
| C  | 29.073320000 | 21.108550000 | 24.825090000 |
| N  | 27.510400000 | 19.312570000 | 25.332770000 |
| C  | 27.749570000 | 20.616620000 | 24.922270000 |
| H  | 31.195370000 | 20.667820000 | 25.081120000 |
| H  | 28.328980000 | 17.502840000 | 25.994460000 |
| H  | 29.253810000 | 22.138940000 | 24.468150000 |
| C  | 26.552190000 | 21.392970000 | 24.575410000 |
| N  | 25.353400000 | 20.698030000 | 24.657830000 |
| C  | 24.202010000 | 21.342730000 | 24.313570000 |
| H  | 23.275930000 | 20.740500000 | 24.372680000 |
| C  | 24.165820000 | 22.681540000 | 23.908630000 |
| C  | 25.378220000 | 23.404910000 | 23.841990000 |
| H  | 25.388160000 | 24.468020000 | 23.534500000 |
| C  | 26.571150000 | 22.749830000 | 24.172960000 |
| H  | 27.532500000 | 23.294020000 | 24.125890000 |
| H  | 24.712300000 | 21.539670000 | 29.633480000 |
| H  | 30.719740000 | 18.291080000 | 25.898480000 |
| H  | 23.193460000 | 23.141290000 | 23.649870000 |
| Ru | 25.522380000 | 18.713800000 | 25.270720000 |
| C  | 28.182100000 | 16.740650000 | 20.580190000 |
| H  | 28.542250000 | 15.827850000 | 21.117860000 |
| H  | 27.890930000 | 16.407750000 | 19.558860000 |

|    |              |              |              |
|----|--------------|--------------|--------------|
| H  | 19.893830000 | 17.258220000 | 23.771460000 |
| Ag | 32.840440000 | 16.752110000 | 15.970260000 |
| Ag | 34.895910000 | 18.642900000 | 15.502530000 |
| Ag | 34.301290000 | 16.642870000 | 13.496670000 |
| Ag | 34.320630000 | 17.645650000 | 18.180980000 |
| Ag | 35.532050000 | 15.868060000 | 16.018640000 |
| Ag | 31.428230000 | 16.951820000 | 18.515340000 |
| Ag | 30.901930000 | 14.761910000 | 16.350460000 |
| Ag | 31.306220000 | 15.923930000 | 13.753730000 |
| Ag | 33.427820000 | 14.148680000 | 15.003580000 |
| Ag | 32.298860000 | 19.309420000 | 17.004480000 |
| Ag | 30.188540000 | 17.661600000 | 15.870640000 |
| Ag | 33.356790000 | 14.727390000 | 17.852220000 |
| Ag | 32.266400000 | 18.649310000 | 13.966440000 |
| Ag | 36.082450000 | 13.035960000 | 16.497400000 |
| Ag | 35.184250000 | 20.726010000 | 17.553470000 |
| Ag | 30.659590000 | 13.028350000 | 13.516430000 |
| Ag | 29.379710000 | 19.181180000 | 18.446460000 |
| Ag | 34.732570000 | 19.616540000 | 12.531040000 |
| Ag | 37.251590000 | 17.832330000 | 17.623040000 |
| Ag | 28.383620000 | 15.074710000 | 14.900840000 |
| Ag | 30.368920000 | 20.644270000 | 15.255490000 |
| Ag | 30.700420000 | 14.208950000 | 19.325220000 |
| Ag | 33.500720000 | 15.871230000 | 20.542320000 |
| Ag | 32.655100000 | 17.352290000 | 11.086870000 |
| Ag | 35.816810000 | 13.870070000 | 13.187530000 |
| S  | 31.645150000 | 14.646470000 | 21.531510000 |



|   |              |              |              |
|---|--------------|--------------|--------------|
| S | 35.873330000 | 20.696950000 | 14.399400000 |
| S | 29.678120000 | 17.836460000 | 20.464630000 |
| S | 33.013800000 | 12.448700000 | 13.196620000 |
| S | 35.303000000 | 15.520740000 | 11.468150000 |
| S | 32.967170000 | 21.725090000 | 17.276530000 |
| S | 35.591300000 | 17.102930000 | 20.300960000 |
| S | 35.075720000 | 13.137430000 | 18.752720000 |
| S | 37.551690000 | 20.234520000 | 17.889490000 |
| S | 31.704700000 | 20.995590000 | 13.246780000 |
| S | 37.765930000 | 15.477310000 | 17.159770000 |
| S | 31.201340000 | 15.401520000 | 11.302530000 |
| S | 27.734700000 | 17.126160000 | 16.070560000 |
| S | 29.065070000 | 13.552400000 | 17.622440000 |
| S | 36.793150000 | 11.992330000 | 14.400390000 |
| S | 28.244360000 | 13.231740000 | 13.317470000 |
| S | 28.616600000 | 20.937500000 | 16.924420000 |
| S | 34.175000000 | 19.055790000 | 10.226880000 |
| C | 32.359000000 | 13.078240000 | 22.041340000 |
| C | 31.512900000 | 11.962680000 | 22.309820000 |
| C | 32.104460000 | 10.766250000 | 22.767320000 |
| C | 33.493000000 | 10.628740000 | 22.977130000 |
| C | 34.309260000 | 11.751840000 | 22.715580000 |
| C | 33.752180000 | 12.954120000 | 22.253680000 |
| C | 30.024060000 | 12.026140000 | 22.078970000 |
| C | 34.094430000 | 9.314820000  | 23.422410000 |
| C | 37.619200000 | 20.413510000 | 14.082190000 |
| C | 38.359040000 | 21.385670000 | 13.346480000 |

|   |              |              |              |
|---|--------------|--------------|--------------|
| C | 39.754260000 | 21.202240000 | 13.218220000 |
| C | 40.443040000 | 20.108850000 | 13.788600000 |
| C | 39.685130000 | 19.147740000 | 14.492970000 |
| C | 38.296570000 | 19.296910000 | 14.621190000 |
| C | 37.682850000 | 22.577180000 | 12.712610000 |
| C | 41.936570000 | 19.940790000 | 13.618820000 |
| C | 33.188110000 | 10.797940000 | 13.871560000 |
| C | 32.882060000 | 9.679050000  | 13.039290000 |
| C | 33.092170000 | 8.385690000  | 13.563210000 |
| C | 33.614250000 | 8.155580000  | 14.856130000 |
| C | 33.916160000 | 9.279360000  | 15.656050000 |
| C | 33.694620000 | 10.578660000 | 15.172060000 |
| C | 32.371710000 | 9.861090000  | 11.629380000 |
| C | 33.826700000 | 6.748920000  | 15.372450000 |
| C | 36.887000000 | 16.251390000 | 11.040450000 |
| C | 37.689460000 | 15.621080000 | 10.040120000 |
| C | 38.899590000 | 16.244340000 | 9.665570000  |
| C | 39.340320000 | 17.465630000 | 10.224840000 |
| C | 38.525670000 | 18.073050000 | 11.204020000 |
| C | 37.328260000 | 17.464110000 | 11.613640000 |
| C | 37.261270000 | 14.329050000 | 9.386420000  |
| C | 40.637510000 | 18.107780000 | 9.783190000  |
| C | 32.567400000 | 22.257360000 | 18.937000000 |
| C | 32.978760000 | 23.554550000 | 19.368070000 |
| C | 32.589800000 | 23.987350000 | 20.653840000 |
| C | 31.798920000 | 23.200980000 | 21.518920000 |
| C | 31.406300000 | 21.919330000 | 21.074930000 |

|   |              |              |              |
|---|--------------|--------------|--------------|
| C | 31.791550000 | 21.456960000 | 19.807150000 |
| C | 33.776830000 | 24.466530000 | 18.469370000 |
| C | 31.342550000 | 23.742710000 | 22.856440000 |
| C | 35.289300000 | 18.441610000 | 21.459020000 |
| C | 35.629080000 | 18.255850000 | 22.831600000 |
| C | 35.473410000 | 19.348640000 | 23.711760000 |
| C | 35.006670000 | 20.610800000 | 23.285970000 |
| C | 34.657620000 | 20.764140000 | 21.926330000 |
| C | 34.798240000 | 19.694830000 | 21.029000000 |
| C | 36.139080000 | 16.926630000 | 23.333060000 |
| C | 34.933470000 | 21.783800000 | 24.238570000 |
| C | 34.316260000 | 11.527150000 | 18.936430000 |
| C | 35.138780000 | 10.405260000 | 19.259570000 |
| C | 34.517600000 | 9.153170000  | 19.458120000 |
| C | 33.121090000 | 8.967730000  | 19.364690000 |
| C | 32.327490000 | 10.093590000 | 19.054880000 |
| C | 32.917080000 | 11.347770000 | 18.837180000 |
| C | 36.635430000 | 10.547830000 | 19.384900000 |
| C | 32.494530000 | 7.602480000  | 19.543000000 |
| C | 37.963400000 | 20.504820000 | 19.608350000 |
| C | 37.841160000 | 21.805720000 | 20.180260000 |
| C | 38.260330000 | 21.994060000 | 21.514080000 |
| C | 38.794260000 | 20.953820000 | 22.303670000 |
| C | 38.925130000 | 19.678830000 | 21.708870000 |
| C | 38.517420000 | 19.459710000 | 20.384860000 |
| C | 37.261070000 | 22.958320000 | 19.401250000 |
| C | 39.171250000 | 21.185590000 | 23.749370000 |

|   |              |              |              |
|---|--------------|--------------|--------------|
| C | 30.406980000 | 20.939460000 | 12.007870000 |
| C | 29.791260000 | 22.164060000 | 11.607870000 |
| C | 28.810800000 | 22.118980000 | 10.595230000 |
| C | 28.425850000 | 20.921760000 | 9.952330000  |
| C | 29.043930000 | 19.723100000 | 10.368350000 |
| C | 30.013080000 | 19.732930000 | 11.385510000 |
| C | 30.159250000 | 23.480170000 | 12.248990000 |
| C | 27.400620000 | 20.928370000 | 8.838390000  |
| C | 39.046450000 | 15.582980000 | 15.905870000 |
| C | 40.411580000 | 15.546420000 | 16.318380000 |
| C | 41.411190000 | 15.558560000 | 15.320170000 |
| C | 41.111970000 | 15.590550000 | 13.939850000 |
| C | 39.752470000 | 15.618470000 | 13.557240000 |
| C | 38.738470000 | 15.620790000 | 14.526760000 |
| C | 40.790890000 | 15.477350000 | 17.778810000 |
| C | 42.205340000 | 15.609420000 | 12.893940000 |
| C | 29.595140000 | 15.901330000 | 10.688350000 |
| C | 29.305750000 | 15.753320000 | 9.299530000  |
| C | 27.999390000 | 16.059620000 | 8.856710000  |
| C | 26.976260000 | 16.490840000 | 9.728170000  |
| C | 27.289700000 | 16.632460000 | 11.098760000 |
| C | 28.579860000 | 16.349080000 | 11.565300000 |
| C | 30.345980000 | 15.261500000 | 8.321320000  |
| C | 25.582920000 | 16.798540000 | 9.224760000  |
| C | 26.806010000 | 17.946000000 | 14.766820000 |
| C | 25.489220000 | 17.497250000 | 14.440990000 |
| C | 24.762940000 | 18.220710000 | 13.470930000 |

|   |              |              |              |
|---|--------------|--------------|--------------|
| C | 25.280540000 | 19.359090000 | 12.808820000 |
| C | 26.594270000 | 19.765150000 | 13.127020000 |
| C | 27.342070000 | 19.059410000 | 14.084100000 |
| C | 24.889990000 | 16.266660000 | 15.074470000 |
| C | 24.448260000 | 20.107730000 | 11.790630000 |
| C | 29.296310000 | 11.786470000 | 17.402970000 |
| C | 28.451180000 | 10.887690000 | 18.121670000 |
| C | 28.577980000 | 9.505560000  | 17.867570000 |
| C | 29.482990000 | 8.979980000  | 16.917760000 |
| C | 30.312230000 | 9.888120000  | 16.225610000 |
| C | 30.225920000 | 11.268160000 | 16.473840000 |
| C | 27.419490000 | 11.393080000 | 19.102080000 |
| C | 29.540960000 | 7.497890000  | 16.622300000 |
| C | 38.539910000 | 12.072600000 | 14.003990000 |
| C | 39.560480000 | 11.803040000 | 14.962650000 |
| C | 40.896590000 | 11.735360000 | 14.513230000 |
| C | 41.268270000 | 11.908360000 | 13.162440000 |
| C | 40.240520000 | 12.172300000 | 12.231100000 |
| C | 38.902970000 | 12.253280000 | 12.647400000 |
| C | 39.248910000 | 11.577660000 | 16.422120000 |
| C | 42.713280000 | 11.788440000 | 12.731050000 |
| C | 27.416390000 | 11.898220000 | 14.178400000 |
| C | 27.601640000 | 10.545190000 | 13.766170000 |
| C | 26.799240000 | 9.548760000  | 14.363420000 |
| C | 25.827470000 | 9.830910000  | 15.345700000 |
| C | 25.666050000 | 11.177260000 | 15.742020000 |
| C | 26.448470000 | 12.191400000 | 15.169170000 |

|   |              |              |              |
|---|--------------|--------------|--------------|
| C | 28.628750000 | 10.165120000 | 12.728710000 |
| C | 25.012260000 | 8.727200000  | 15.980260000 |
| C | 29.031950000 | 22.526560000 | 17.634950000 |
| C | 28.511210000 | 22.922780000 | 18.901970000 |
| C | 28.835840000 | 24.208470000 | 19.386580000 |
| C | 29.642410000 | 25.120450000 | 18.670830000 |
| C | 30.119570000 | 24.717310000 | 17.404500000 |
| C | 29.823820000 | 23.442480000 | 16.900800000 |
| C | 27.669350000 | 21.986150000 | 19.732520000 |
| C | 29.990420000 | 26.478560000 | 19.239170000 |
| C | 33.257700000 | 20.482380000 | 9.649690000  |
| C | 32.297360000 | 20.353240000 | 8.603440000  |
| C | 31.679860000 | 21.524130000 | 8.114690000  |
| C | 31.975770000 | 22.813030000 | 8.607160000  |
| C | 32.943010000 | 22.919220000 | 9.632550000  |
| C | 33.568490000 | 21.772250000 | 10.146340000 |
| C | 31.925620000 | 19.010050000 | 8.027250000  |
| C | 31.251540000 | 24.030740000 | 8.078370000  |
| H | 31.444270000 | 9.895520000  | 22.960590000 |
| H | 35.404990000 | 11.682410000 | 22.865060000 |
| H | 34.412250000 | 13.820300000 | 22.039100000 |
| H | 29.547770000 | 12.842890000 | 22.670860000 |
| H | 29.535580000 | 11.062100000 | 22.341750000 |
| H | 29.801010000 | 12.250950000 | 21.005900000 |
| H | 33.347640000 | 8.672360000  | 23.940110000 |
| H | 34.952900000 | 9.469070000  | 24.114980000 |
| H | 34.478870000 | 8.738770000  | 22.546200000 |

|   |              |              |              |
|---|--------------|--------------|--------------|
| H | 40.329530000 | 21.962410000 | 12.650470000 |
| H | 40.179540000 | 18.265260000 | 14.943950000 |
| H | 37.709050000 | 18.526470000 | 15.162840000 |
| H | 36.934880000 | 22.253360000 | 11.949500000 |
| H | 38.424710000 | 23.240350000 | 12.215340000 |
| H | 37.119760000 | 23.173510000 | 13.466690000 |
| H | 42.166670000 | 19.182390000 | 12.831940000 |
| H | 42.417230000 | 19.578500000 | 14.555850000 |
| H | 42.431570000 | 20.890810000 | 13.318260000 |
| H | 32.853620000 | 7.516590000  | 12.916250000 |
| H | 34.324050000 | 9.146660000  | 16.677410000 |
| H | 33.923990000 | 11.451460000 | 15.818810000 |
| H | 31.493560000 | 10.547200000 | 11.597600000 |
| H | 32.076150000 | 8.887050000  | 11.181520000 |
| H | 33.145640000 | 10.328780000 | 10.976050000 |
| H | 32.885880000 | 6.320870000  | 15.796570000 |
| H | 34.590000000 | 6.728110000  | 16.181880000 |
| H | 34.160110000 | 6.060250000  | 14.563000000 |
| H | 39.528640000 | 15.746150000 | 8.898400000  |
| H | 38.840390000 | 19.023040000 | 11.678510000 |
| H | 36.721370000 | 17.935030000 | 12.414850000 |
| H | 36.991770000 | 13.557410000 | 10.145560000 |
| H | 38.066420000 | 13.924100000 | 8.734310000  |
| H | 36.345550000 | 14.473290000 | 8.766150000  |
| H | 41.443640000 | 17.351990000 | 9.637380000  |
| H | 40.989320000 | 18.850700000 | 10.533670000 |
| H | 40.517250000 | 18.648440000 | 8.813710000  |

|   |              |              |              |
|---|--------------|--------------|--------------|
| H | 32.914470000 | 24.994590000 | 20.988250000 |
| H | 30.798340000 | 21.261270000 | 21.728890000 |
| H | 31.476170000 | 20.448840000 | 19.465090000 |
| H | 34.671360000 | 23.951420000 | 18.050180000 |
| H | 34.112280000 | 25.373620000 | 19.019030000 |
| H | 33.169950000 | 24.784070000 | 17.589330000 |
| H | 32.038960000 | 24.515990000 | 23.252490000 |
| H | 31.268320000 | 22.931910000 | 23.618430000 |
| H | 30.334230000 | 24.220690000 | 22.774120000 |
| H | 35.746570000 | 19.207380000 | 24.778260000 |
| H | 34.276940000 | 21.735950000 | 21.556190000 |
| H | 34.532640000 | 19.835390000 | 19.958600000 |
| H | 35.362450000 | 16.131660000 | 23.212490000 |
| H | 36.425310000 | 16.978880000 | 24.406750000 |
| H | 37.021030000 | 16.587520000 | 22.741520000 |
| H | 34.838960000 | 21.452640000 | 25.297140000 |
| H | 34.073870000 | 22.451530000 | 23.999390000 |
| H | 35.855720000 | 22.411460000 | 24.169190000 |
| H | 35.159980000 | 8.281100000  | 19.700250000 |
| H | 31.229740000 | 9.986900000  | 18.965680000 |
| H | 32.276530000 | 12.216700000 | 18.569550000 |
| H | 37.079690000 | 10.926840000 | 18.433370000 |
| H | 37.114230000 | 9.576090000  | 19.638460000 |
| H | 36.905590000 | 11.297940000 | 20.165450000 |
| H | 32.339460000 | 7.101650000  | 18.556900000 |
| H | 31.495720000 | 7.673860000  | 20.029450000 |
| H | 33.134670000 | 6.931140000  | 20.158140000 |



|   |              |              |              |
|---|--------------|--------------|--------------|
| H | 38.159860000 | 23.007860000 | 21.956130000 |
| H | 39.346200000 | 18.836530000 | 22.293490000 |
| H | 38.619440000 | 18.452540000 | 19.932280000 |
| H | 37.837180000 | 23.157450000 | 18.467790000 |
| H | 37.236340000 | 23.886030000 | 20.014310000 |
| H | 36.216280000 | 22.725870000 | 19.076360000 |
| H | 39.349580000 | 22.264630000 | 23.956860000 |
| H | 40.090280000 | 20.622660000 | 24.030670000 |
| H | 38.357300000 | 20.843200000 | 24.434820000 |
| H | 28.330330000 | 23.071670000 | 10.290360000 |
| H | 28.756270000 | 18.762320000 | 9.898920000  |
| H | 30.476280000 | 18.776860000 | 11.710820000 |
| H | 29.913000000 | 23.483660000 | 13.338100000 |
| H | 29.615310000 | 24.321270000 | 11.765050000 |
| H | 31.253360000 | 23.672730000 | 12.169860000 |
| H | 26.564190000 | 21.634410000 | 9.051370000  |
| H | 26.969260000 | 19.914030000 | 8.683590000  |
| H | 27.854660000 | 21.248720000 | 7.868710000  |
| H | 42.472460000 | 15.527250000 | 15.645810000 |
| H | 39.480350000 | 15.636580000 | 12.483950000 |
| H | 37.674860000 | 15.638460000 | 14.207150000 |
| H | 40.419480000 | 16.366740000 | 18.341440000 |
| H | 41.894510000 | 15.420030000 | 17.903350000 |
| H | 40.334650000 | 14.587680000 | 18.273010000 |
| H | 42.427150000 | 16.652910000 | 12.560860000 |
| H | 41.904140000 | 15.034100000 | 11.988800000 |
| H | 43.153530000 | 15.173630000 | 13.281480000 |

|   |              |              |              |
|---|--------------|--------------|--------------|
| H | 27.767900000 | 15.930260000 | 7.779300000  |
| H | 26.518530000 | 16.971540000 | 11.816710000 |
| H | 28.815510000 | 16.476940000 | 12.643020000 |
| H | 31.229530000 | 15.941710000 | 8.281610000  |
| H | 29.919220000 | 15.183410000 | 7.297120000  |
| H | 30.739500000 | 14.263340000 | 8.622230000  |
| H | 25.343070000 | 17.883510000 | 9.332900000  |
| H | 24.810920000 | 16.243170000 | 9.806510000  |
| H | 25.463140000 | 16.531710000 | 8.151400000  |
| H | 23.744580000 | 17.860340000 | 13.215290000 |
| H | 27.055150000 | 20.632000000 | 12.611910000 |
| H | 28.378860000 | 19.379960000 | 14.314300000 |
| H | 25.475990000 | 15.358950000 | 14.787590000 |
| H | 23.838800000 | 16.120830000 | 14.745720000 |
| H | 24.908050000 | 16.325410000 | 16.186600000 |
| H | 24.080930000 | 19.432820000 | 10.981620000 |
| H | 25.036080000 | 20.924880000 | 11.316810000 |
| H | 23.544520000 | 20.564400000 | 12.259620000 |
| H | 27.926020000 | 8.811040000  | 18.437040000 |
| H | 31.053380000 | 9.516120000  | 15.492420000 |
| H | 30.900320000 | 11.967110000 | 15.935500000 |
| H | 27.877400000 | 12.046450000 | 19.881020000 |
| H | 26.904370000 | 10.546900000 | 19.607790000 |
| H | 26.652320000 | 12.015250000 | 18.583930000 |
| H | 29.537620000 | 6.880010000  | 17.550060000 |
| H | 30.454260000 | 7.245100000  | 16.039250000 |
| H | 28.658290000 | 7.179710000  | 16.016990000 |

|   |              |              |              |
|---|--------------|--------------|--------------|
| H | 41.685840000 | 11.530980000 | 15.265400000 |
| H | 40.487900000 | 12.321660000 | 11.160510000 |
| H | 38.106670000 | 12.455820000 | 11.904420000 |
| H | 38.743890000 | 12.466570000 | 16.874420000 |
| H | 40.176080000 | 11.374520000 | 17.002250000 |
| H | 38.555310000 | 10.714700000 | 16.556370000 |
| H | 43.402740000 | 12.256170000 | 13.470500000 |
| H | 42.884530000 | 12.276010000 | 11.745510000 |
| H | 43.020410000 | 10.719580000 | 12.631070000 |
| H | 26.938860000 | 8.498700000  | 14.031550000 |
| H | 24.906570000 | 11.441940000 | 16.505040000 |
| H | 26.311260000 | 13.243890000 | 15.489440000 |
| H | 28.450880000 | 10.688350000 | 11.760240000 |
| H | 28.628080000 | 9.067830000  | 12.547500000 |
| H | 29.653380000 | 10.462050000 | 13.063690000 |
| H | 25.005530000 | 7.809620000  | 15.350510000 |
| H | 23.956420000 | 9.041510000  | 16.147010000 |
| H | 25.431440000 | 8.444070000  | 16.975700000 |
| H | 28.441840000 | 24.507060000 | 20.381490000 |
| H | 30.744980000 | 25.407590000 | 16.802130000 |
| H | 30.249850000 | 23.132190000 | 15.924550000 |
| H | 26.767300000 | 21.641190000 | 19.174230000 |
| H | 27.339440000 | 22.472150000 | 20.677800000 |
| H | 28.240520000 | 21.059780000 | 19.995250000 |
| H | 29.283100000 | 27.266500000 | 18.884750000 |
| H | 31.014180000 | 26.792420000 | 18.931100000 |
| H | 29.954740000 | 26.471220000 | 20.351830000 |

|   |              |              |              |
|---|--------------|--------------|--------------|
| H | 30.930130000 | 21.418940000 | 7.302820000  |
| H | 33.215860000 | 23.914820000 | 10.038310000 |
| H | 34.322150000 | 21.868680000 | 10.953780000 |
| H | 32.811210000 | 18.484670000 | 7.598900000  |
| H | 31.154220000 | 19.118170000 | 7.233910000  |
| H | 31.514570000 | 18.337990000 | 8.821600000  |
| H | 30.847550000 | 23.853980000 | 7.056720000  |
| H | 31.918390000 | 24.921930000 | 8.038950000  |
| H | 30.386830000 | 24.293960000 | 8.734340000  |

#### B Isomer

|    |              |              |              |
|----|--------------|--------------|--------------|
| Ag | 14.331050000 | 14.747390000 | 19.909370000 |
| Ag | 11.571060000 | 14.779290000 | 20.488750000 |
| Ag | 13.153430000 | 12.383280000 | 20.887310000 |
| Ag | 12.663810000 | 16.381280000 | 18.314520000 |
| Ag | 12.592220000 | 13.360250000 | 18.178500000 |
| Ag | 15.509750000 | 17.056570000 | 18.877750000 |
| Ag | 17.076000000 | 14.517060000 | 19.264920000 |
| Ag | 15.997680000 | 13.221920000 | 21.585030000 |
| Ag | 15.262100000 | 12.341130000 | 18.718170000 |
| Ag | 13.378650000 | 17.193480000 | 20.970410000 |
| Ag | 16.003530000 | 16.145920000 | 21.693610000 |
| Ag | 15.058140000 | 14.789060000 | 17.152790000 |
| Ag | 13.702110000 | 14.624410000 | 22.678510000 |
| Ag | 13.735860000 | 11.959720000 | 15.880520000 |

|    |              |              |              |
|----|--------------|--------------|--------------|
| Ag | 10.182870000 | 17.382490000 | 20.274690000 |
| Ag | 18.058920000 | 11.601610000 | 20.208400000 |
| Ag | 15.793600000 | 19.163350000 | 21.227990000 |
| Ag | 11.142820000 | 13.183340000 | 23.180810000 |
| Ag | 10.087230000 | 15.066900000 | 17.591670000 |
| Ag | 18.857550000 | 14.592110000 | 21.674270000 |
| Ag | 14.215230000 | 17.473380000 | 23.777670000 |
| Ag | 17.521600000 | 16.621400000 | 16.773710000 |
| Ag | 14.329140000 | 17.446040000 | 15.997390000 |
| Ag | 14.219050000 | 11.649460000 | 23.616270000 |
| Ag | 13.532180000 | 9.948950000  | 18.716190000 |
| S  | 16.510330000 | 18.254520000 | 15.262980000 |
| S  | 9.635570000  | 14.757610000 | 22.101100000 |
| S  | 16.203520000 | 19.497890000 | 18.851380000 |
| S  | 16.550580000 | 10.173320000 | 18.924940000 |
| S  | 13.081830000 | 9.888210000  | 21.106210000 |
| S  | 11.508010000 | 18.578680000 | 21.943870000 |
| S  | 11.899970000 | 17.191470000 | 16.046240000 |
| S  | 14.470610000 | 14.072570000 | 14.830260000 |
| S  | 8.483300000  | 16.451350000 | 18.790110000 |
| S  | 12.959470000 | 15.677450000 | 24.847570000 |
| S  | 10.966090000 | 13.218040000 | 16.241490000 |
| S  | 16.545790000 | 11.210590000 | 22.979050000 |
| S  | 18.329110000 | 16.876370000 | 22.354660000 |
| S  | 19.146410000 | 15.409830000 | 18.153490000 |
| S  | 13.739900000 | 9.554260000  | 16.321910000 |
| S  | 19.942550000 | 12.421740000 | 21.530020000 |

|   |              |              |              |
|---|--------------|--------------|--------------|
| S | 15.507160000 | 19.539020000 | 23.614110000 |
| S | 11.995450000 | 11.408700000 | 24.599040000 |
| C | 16.699110000 | 17.577890000 | 13.608040000 |
| C | 17.985740000 | 17.544860000 | 12.995800000 |
| C | 18.099830000 | 17.016660000 | 11.693140000 |
| C | 16.993210000 | 16.532980000 | 10.964480000 |
| C | 15.721240000 | 16.615470000 | 11.573760000 |
| C | 15.576770000 | 17.126780000 | 12.873020000 |
| C | 19.217210000 | 18.013380000 | 13.729750000 |
| C | 17.173070000 | 15.884990000 | 9.610720000  |
| C | 8.352450000  | 13.686570000 | 21.443640000 |
| C | 7.222350000  | 13.382190000 | 22.258870000 |
| C | 6.172830000  | 12.631070000 | 21.685460000 |
| C | 6.195830000  | 12.170490000 | 20.350640000 |
| C | 7.335420000  | 12.466000000 | 19.570310000 |
| C | 8.396150000  | 13.204800000 | 20.115530000 |
| C | 7.141790000  | 13.832300000 | 23.697940000 |
| C | 5.049260000  | 11.363620000 | 19.783210000 |
| C | 17.326460000 | 9.777960000  | 17.358060000 |
| C | 18.125590000 | 8.600120000  | 17.265340000 |
| C | 18.659560000 | 8.258380000  | 16.002990000 |
| C | 18.421730000 | 9.018580000  | 14.836600000 |
| C | 17.619270000 | 10.175410000 | 14.952870000 |
| C | 17.089350000 | 10.550100000 | 16.197200000 |
| C | 18.379850000 | 7.715120000  | 18.463360000 |
| C | 19.029020000 | 8.620070000  | 13.509080000 |
| C | 11.372000000 | 9.352260000  | 21.222910000 |

|   |              |              |              |
|---|--------------|--------------|--------------|
| C | 11.081840000 | 7.954000000  | 21.209850000 |
| C | 9.740820000  | 7.549950000  | 21.380130000 |
| C | 8.680500000  | 8.465400000  | 21.573470000 |
| C | 8.991530000  | 9.841460000  | 21.576150000 |
| C | 10.316040000 | 10.273360000 | 21.393410000 |
| C | 12.172630000 | 6.926750000  | 21.024930000 |
| C | 7.259300000  | 7.981840000  | 21.764870000 |
| C | 11.560870000 | 20.237300000 | 21.265940000 |
| C | 10.556710000 | 21.174490000 | 21.658300000 |
| C | 10.644690000 | 22.494130000 | 21.164760000 |
| C | 11.681260000 | 22.926120000 | 20.307820000 |
| C | 12.657700000 | 21.978930000 | 19.928870000 |
| C | 12.595900000 | 20.658440000 | 20.401030000 |
| C | 9.427540000  | 20.774520000 | 22.578060000 |
| C | 11.753030000 | 24.360900000 | 19.832400000 |
| C | 11.354350000 | 18.897920000 | 16.166620000 |
| C | 11.214910000 | 19.673880000 | 14.978770000 |
| C | 10.668110000 | 20.971380000 | 15.091710000 |
| C | 10.254920000 | 21.525790000 | 16.321680000 |
| C | 10.426320000 | 20.745120000 | 17.486570000 |
| C | 10.970150000 | 19.455240000 | 17.406650000 |
| C | 11.642010000 | 19.141800000 | 13.631570000 |
| C | 9.624420000  | 22.898640000 | 16.396500000 |
| C | 15.950900000 | 13.619880000 | 13.929270000 |
| C | 15.821330000 | 12.944640000 | 12.676790000 |
| C | 16.992480000 | 12.644910000 | 11.949230000 |
| C | 18.284630000 | 13.000510000 | 12.398010000 |

|   |              |              |              |
|---|--------------|--------------|--------------|
| C | 18.388480000 | 13.679280000 | 13.630570000 |
| C | 17.240950000 | 13.974250000 | 14.384570000 |
| C | 14.470910000 | 12.549740000 | 12.134150000 |
| C | 19.517270000 | 12.635460000 | 11.600030000 |
| C | 7.949410000  | 17.705070000 | 17.630300000 |
| C | 7.276760000  | 18.870290000 | 18.100640000 |
| C | 6.781060000  | 19.787750000 | 17.149530000 |
| C | 6.926850000  | 19.604460000 | 15.759340000 |
| C | 7.588580000  | 18.437070000 | 15.315790000 |
| C | 8.084760000  | 17.501700000 | 16.235450000 |
| C | 7.115290000  | 19.149840000 | 19.573250000 |
| C | 6.424210000  | 20.637830000 | 14.776920000 |
| C | 14.091100000 | 15.239980000 | 26.171870000 |
| C | 14.015670000 | 15.940040000 | 27.414790000 |
| C | 14.875190000 | 15.540330000 | 28.461600000 |
| C | 15.791470000 | 14.471660000 | 28.336090000 |
| C | 15.840350000 | 13.789270000 | 27.102470000 |
| C | 15.009200000 | 14.174860000 | 26.038740000 |
| C | 13.055150000 | 17.086910000 | 27.614150000 |
| C | 16.674790000 | 14.048420000 | 29.488500000 |
| C | 9.854540000  | 11.859080000 | 16.621190000 |
| C | 8.709180000  | 11.646120000 | 15.797980000 |
| C | 7.889140000  | 10.528990000 | 16.074410000 |
| C | 8.162880000  | 9.615790000  | 17.116190000 |
| C | 9.304420000  | 9.847240000  | 17.914580000 |
| C | 10.132360000 | 10.952650000 | 17.670330000 |
| C | 8.367940000  | 12.583590000 | 14.663000000 |



|   |              |              |              |
|---|--------------|--------------|--------------|
| C | 7.254730000  | 8.439500000  | 17.398570000 |
| C | 17.610610000 | 11.710150000 | 24.329130000 |
| C | 18.101440000 | 10.699070000 | 25.207130000 |
| C | 19.023730000 | 11.075520000 | 26.207970000 |
| C | 19.481110000 | 12.400620000 | 26.370450000 |
| C | 18.963630000 | 13.388950000 | 25.504300000 |
| C | 18.039230000 | 13.046410000 | 24.505760000 |
| C | 17.660540000 | 9.260350000  | 25.074910000 |
| C | 20.503060000 | 12.757660000 | 27.426850000 |
| C | 18.660450000 | 16.878300000 | 24.115330000 |
| C | 20.005930000 | 17.010770000 | 24.576880000 |
| C | 20.230090000 | 17.107110000 | 25.965210000 |
| C | 19.180980000 | 17.084150000 | 26.913330000 |
| C | 17.862540000 | 16.934610000 | 26.433390000 |
| C | 17.608890000 | 16.825500000 | 25.055730000 |
| C | 21.168990000 | 17.023440000 | 23.613500000 |
| C | 19.467720000 | 17.219370000 | 28.392690000 |
| C | 19.929100000 | 14.220600000 | 17.071490000 |
| C | 20.981230000 | 14.654000000 | 16.211260000 |
| C | 21.638930000 | 13.686920000 | 15.423620000 |
| C | 21.337210000 | 12.307880000 | 15.493050000 |
| C | 20.300430000 | 11.903930000 | 16.360060000 |
| C | 19.594800000 | 12.850170000 | 17.122980000 |
| C | 21.429830000 | 16.096100000 | 16.174350000 |
| C | 22.123090000 | 11.296190000 | 14.688770000 |
| C | 12.238190000 | 8.661660000  | 15.923030000 |
| C | 11.496160000 | 8.883100000  | 14.726390000 |

|   |              |              |              |
|---|--------------|--------------|--------------|
| C | 10.410880000 | 8.024750000  | 14.447280000 |
| C | 10.038500000 | 6.951870000  | 15.284130000 |
| C | 10.790100000 | 6.750080000  | 16.462030000 |
| C | 11.865590000 | 7.593490000  | 16.774960000 |
| C | 11.840470000 | 9.986380000  | 13.756040000 |
| C | 8.898770000  | 6.031310000  | 14.910160000 |
| C | 21.290210000 | 12.563700000 | 20.363870000 |
| C | 21.889990000 | 11.386010000 | 19.828370000 |
| C | 22.975900000 | 11.533850000 | 18.937030000 |
| C | 23.486130000 | 12.790750000 | 18.549840000 |
| C | 22.889120000 | 13.939540000 | 19.115470000 |
| C | 21.817910000 | 13.827110000 | 20.011070000 |
| C | 21.350640000 | 10.015240000 | 20.157150000 |
| C | 24.605400000 | 12.934880000 | 17.547870000 |
| C | 14.247750000 | 20.794610000 | 23.850530000 |
| C | 14.400990000 | 22.101600000 | 23.302850000 |
| C | 13.430430000 | 23.077030000 | 23.618330000 |
| C | 12.324330000 | 22.820550000 | 24.454200000 |
| C | 12.194560000 | 21.519070000 | 24.988680000 |
| C | 13.135390000 | 20.524170000 | 24.685290000 |
| C | 15.549350000 | 22.455900000 | 22.390100000 |
| C | 11.316520000 | 23.900490000 | 24.777480000 |
| C | 12.005100000 | 12.145220000 | 26.231720000 |
| C | 12.877310000 | 11.636710000 | 27.239470000 |
| C | 12.789270000 | 12.183170000 | 28.536830000 |
| C | 11.875430000 | 13.201000000 | 28.883490000 |
| C | 11.005340000 | 13.672570000 | 27.875610000 |

|   |              |              |              |
|---|--------------|--------------|--------------|
| C | 11.072510000 | 13.155570000 | 26.571800000 |
| C | 13.887170000 | 10.555740000 | 26.944700000 |
| C | 11.870140000 | 13.799460000 | 30.272130000 |
| H | 19.108030000 | 16.972130000 | 11.230940000 |
| H | 14.824560000 | 16.261120000 | 11.027110000 |
| H | 14.573430000 | 17.149920000 | 13.346040000 |
| H | 19.128060000 | 19.076990000 | 14.053850000 |
| H | 20.125190000 | 17.902810000 | 13.094640000 |
| H | 19.361490000 | 17.413800000 | 14.660270000 |
| H | 18.101920000 | 16.232190000 | 9.104890000  |
| H | 16.312530000 | 16.090170000 | 8.935200000  |
| H | 17.245330000 | 14.775940000 | 9.724420000  |
| H | 5.288280000  | 12.403610000 | 22.316340000 |
| H | 7.405100000  | 12.110150000 | 18.523480000 |
| H | 9.287500000  | 13.425800000 | 19.491320000 |
| H | 7.957220000  | 13.368460000 | 24.303440000 |
| H | 6.167060000  | 13.546590000 | 24.152070000 |
| H | 7.272270000  | 14.935020000 | 23.792060000 |
| H | 5.263500000  | 10.268220000 | 19.824320000 |
| H | 4.861170000  | 11.619340000 | 18.716180000 |
| H | 4.108840000  | 11.537640000 | 20.352300000 |
| H | 19.281400000 | 7.341960000  | 15.929900000 |
| H | 17.410770000 | 10.805410000 | 14.065750000 |
| H | 16.467550000 | 11.466040000 | 16.274910000 |
| H | 18.784350000 | 8.293760000  | 19.326480000 |
| H | 19.100420000 | 6.906060000  | 18.211290000 |
| H | 17.435520000 | 7.246040000  | 18.827530000 |

|   |              |              |              |
|---|--------------|--------------|--------------|
| H | 19.929820000 | 9.237610000  | 13.273450000 |
| H | 18.310360000 | 8.765560000  | 12.670970000 |
| H | 19.348160000 | 7.554080000  | 13.512100000 |
| H | 9.519200000  | 6.462300000  | 21.368390000 |
| H | 8.188870000  | 10.593800000 | 21.705670000 |
| H | 10.540880000 | 11.359850000 | 21.369710000 |
| H | 12.769060000 | 7.130630000  | 20.103680000 |
| H | 11.747660000 | 5.901100000  | 20.955890000 |
| H | 12.901000000 | 6.953710000  | 21.868890000 |
| H | 6.917810000  | 7.361380000  | 20.902860000 |
| H | 6.556400000  | 8.837970000  | 21.870960000 |
| H | 7.161110000  | 7.347410000  | 22.677000000 |
| H | 9.863870000  | 23.221430000 | 21.471250000 |
| H | 13.478450000 | 22.266630000 | 19.241830000 |
| H | 13.361850000 | 19.923620000 | 20.079870000 |
| H | 8.802850000  | 19.964520000 | 22.131170000 |
| H | 8.765960000  | 21.641350000 | 22.801020000 |
| H | 9.822180000  | 20.363890000 | 23.536400000 |
| H | 10.740280000 | 24.811480000 | 19.726600000 |
| H | 12.270880000 | 24.437490000 | 18.850630000 |
| H | 12.319860000 | 24.999870000 | 20.552320000 |
| H | 10.559480000 | 21.574620000 | 14.166140000 |
| H | 10.132400000 | 21.149490000 | 18.474920000 |
| H | 11.087380000 | 18.844610000 | 18.327650000 |
| H | 12.733930000 | 18.908150000 | 13.624020000 |
| H | 11.439950000 | 19.884790000 | 12.828260000 |
| H | 11.118330000 | 18.190420000 | 13.378600000 |

|   |              |              |              |
|---|--------------|--------------|--------------|
| H | 9.737030000  | 23.454840000 | 15.439630000 |
| H | 10.078250000 | 23.513630000 | 17.207800000 |
| H | 8.532630000  | 22.827030000 | 16.620170000 |
| H | 16.883030000 | 12.107860000 | 10.983460000 |
| H | 19.382950000 | 13.970370000 | 14.020930000 |
| H | 17.342240000 | 14.493630000 | 15.361540000 |
| H | 13.920050000 | 11.911120000 | 12.864610000 |
| H | 14.571730000 | 11.990210000 | 11.178150000 |
| H | 13.826740000 | 13.443410000 | 11.959280000 |
| H | 19.806890000 | 11.569300000 | 11.764570000 |
| H | 20.386850000 | 13.264700000 | 11.894540000 |
| H | 19.351540000 | 12.761370000 | 10.505430000 |
| H | 6.255530000  | 20.692170000 | 17.521790000 |
| H | 7.724100000  | 18.256630000 | 14.230920000 |
| H | 8.604740000  | 16.591810000 | 15.871720000 |
| H | 6.587410000  | 18.321070000 | 20.100630000 |
| H | 6.554350000  | 20.094910000 | 19.743470000 |
| H | 8.116080000  | 19.243330000 | 20.065050000 |
| H | 5.742860000  | 21.367870000 | 15.267020000 |
| H | 5.872820000  | 20.165220000 | 13.931920000 |
| H | 7.272000000  | 21.213690000 | 14.334610000 |
| H | 14.820320000 | 16.094630000 | 29.422480000 |
| H | 16.546700000 | 12.947950000 | 26.961830000 |
| H | 15.068280000 | 13.634580000 | 25.069640000 |
| H | 13.313730000 | 17.945410000 | 26.948340000 |
| H | 13.074800000 | 17.447190000 | 28.666680000 |
| H | 12.013510000 | 16.787740000 | 27.354130000 |

|   |              |              |              |
|---|--------------|--------------|--------------|
| H | 16.990460000 | 14.916140000 | 30.111420000 |
| H | 17.589470000 | 13.530830000 | 29.121980000 |
| H | 16.142840000 | 13.337620000 | 30.165170000 |
| H | 6.998440000  | 10.362080000 | 15.432790000 |
| H | 9.555210000  | 9.153600000  | 18.740320000 |
| H | 11.030050000 | 11.116040000 | 18.303950000 |
| H | 8.113260000  | 13.601320000 | 15.045500000 |
| H | 7.499910000  | 12.203160000 | 14.080270000 |
| H | 9.231030000  | 12.720040000 | 13.970040000 |
| H | 6.544970000  | 8.670480000  | 18.229780000 |
| H | 7.842940000  | 7.546700000  | 17.710310000 |
| H | 6.646530000  | 8.163230000  | 16.508500000 |
| H | 19.409830000 | 10.287270000 | 26.886880000 |
| H | 19.270580000 | 14.446070000 | 25.622020000 |
| H | 17.622230000 | 13.840130000 | 23.850660000 |
| H | 16.551350000 | 9.163180000  | 25.152890000 |
| H | 18.126780000 | 8.629630000  | 25.863790000 |
| H | 17.937230000 | 8.842880000  | 24.078650000 |
| H | 20.206940000 | 13.674570000 | 27.987280000 |
| H | 21.498100000 | 12.967390000 | 26.967540000 |
| H | 20.640930000 | 11.932400000 | 28.159770000 |
| H | 21.276780000 | 17.204110000 | 26.322820000 |
| H | 17.012870000 | 16.887410000 | 27.142410000 |
| H | 16.567950000 | 16.693880000 | 24.694570000 |
| H | 21.194020000 | 16.077830000 | 23.017420000 |
| H | 22.137060000 | 17.124320000 | 24.153530000 |
| H | 21.075700000 | 17.856480000 | 22.877130000 |

|   |              |              |              |
|---|--------------|--------------|--------------|
| H | 20.239580000 | 16.489620000 | 28.731060000 |
| H | 18.548420000 | 17.048840000 | 28.994600000 |
| H | 19.854760000 | 18.235130000 | 28.647530000 |
| H | 22.439790000 | 14.032370000 | 14.737820000 |
| H | 20.027090000 | 10.833520000 | 16.435440000 |
| H | 18.767060000 | 12.522020000 | 17.786480000 |
| H | 20.564860000 | 16.795850000 | 16.242340000 |
| H | 22.002490000 | 16.313070000 | 15.244280000 |
| H | 22.086890000 | 16.327900000 | 17.048060000 |
| H | 22.147380000 | 11.557380000 | 13.605360000 |
| H | 21.683280000 | 10.279670000 | 14.791490000 |
| H | 23.182850000 | 11.247770000 | 15.038660000 |
| H | 9.829570000  | 8.208110000  | 13.520230000 |
| H | 10.529180000 | 5.922820000  | 17.152040000 |
| H | 12.451280000 | 7.421140000  | 17.699500000 |
| H | 11.806510000 | 10.989090000 | 14.249180000 |
| H | 11.127330000 | 9.997980000  | 12.901900000 |
| H | 12.871170000 | 9.861880000  | 13.348110000 |
| H | 8.100740000  | 6.574250000  | 14.355740000 |
| H | 8.437870000  | 5.561660000  | 15.807860000 |
| H | 9.251050000  | 5.203190000  | 14.249540000 |
| H | 23.433190000 | 10.616840000 | 18.510390000 |
| H | 23.264890000 | 14.939690000 | 18.822040000 |
| H | 21.333820000 | 14.729600000 | 20.437290000 |
| H | 21.271030000 | 9.853060000  | 21.257480000 |
| H | 21.986820000 | 9.214380000  | 19.719180000 |
| H | 20.313510000 | 9.897930000  | 19.752170000 |

|   |              |              |              |
|---|--------------|--------------|--------------|
| H | 24.952680000 | 11.954370000 | 17.159660000 |
| H | 25.491510000 | 13.444750000 | 17.994670000 |
| H | 24.279110000 | 13.550490000 | 16.677800000 |
| H | 13.549640000 | 24.089950000 | 23.181690000 |
| H | 11.339990000 | 21.274160000 | 25.651280000 |
| H | 13.005150000 | 19.503470000 | 25.098290000 |
| H | 16.534640000 | 22.290040000 | 22.885340000 |
| H | 15.483110000 | 23.517990000 | 22.065650000 |
| H | 15.544070000 | 21.810910000 | 21.475500000 |
| H | 11.475320000 | 24.315310000 | 25.801940000 |
| H | 10.275760000 | 23.504500000 | 24.745620000 |
| H | 11.383350000 | 24.747730000 | 24.059610000 |
| H | 13.471190000 | 11.787170000 | 29.317700000 |
| H | 10.260440000 | 14.458360000 | 28.113630000 |
| H | 10.390860000 | 13.547180000 | 25.789660000 |
| H | 13.397880000 | 9.636510000  | 26.546230000 |
| H | 14.465920000 | 10.291760000 | 27.856960000 |
| H | 14.613020000 | 10.886090000 | 26.158170000 |
| H | 12.215370000 | 13.067730000 | 31.036970000 |
| H | 10.858010000 | 14.158110000 | 30.564890000 |
| H | 12.559530000 | 14.676870000 | 30.324730000 |
| C | 17.851440000 | 20.246720000 | 18.518300000 |
| H | 17.774000000 | 21.308370000 | 18.854060000 |
| H | 17.921740000 | 20.271720000 | 17.401590000 |
| C | 19.156000000 | 19.675600000 | 19.044240000 |
| C | 19.350420000 | 18.382570000 | 19.563670000 |
| C | 20.303670000 | 20.493510000 | 18.952900000 |



|   |              |              |              |
|---|--------------|--------------|--------------|
| C | 20.646920000 | 17.944430000 | 19.904150000 |
| N | 21.552780000 | 20.090360000 | 19.282430000 |
| C | 21.756070000 | 18.798660000 | 19.744600000 |
| H | 20.225200000 | 21.533110000 | 18.578800000 |
| H | 20.774000000 | 16.913460000 | 20.281320000 |
| C | 23.177120000 | 18.435390000 | 19.989280000 |
| N | 24.086940000 | 19.435760000 | 19.708820000 |
| C | 25.416720000 | 19.199210000 | 19.868130000 |
| H | 26.084590000 | 20.046350000 | 19.628070000 |
| C | 25.968610000 | 17.987670000 | 20.321570000 |
| C | 25.038290000 | 16.956350000 | 20.612350000 |
| H | 25.402750000 | 15.966720000 | 20.953530000 |
| C | 23.656610000 | 17.188870000 | 20.458930000 |
| H | 22.939930000 | 16.384920000 | 20.711900000 |
| H | 22.574750000 | 20.951220000 | 24.333330000 |
| C | 22.501550000 | 21.613850000 | 23.451320000 |
| C | 21.969910000 | 22.919270000 | 23.544890000 |
| C | 22.949200000 | 21.156040000 | 22.206310000 |
| C | 21.893260000 | 23.697640000 | 22.384500000 |
| N | 22.884800000 | 21.904320000 | 21.068130000 |
| C | 22.336070000 | 23.177080000 | 21.144180000 |
| H | 21.605480000 | 23.314990000 | 24.511410000 |
| H | 23.385530000 | 20.144890000 | 22.096670000 |
| H | 21.449200000 | 24.708470000 | 22.427090000 |
| C | 22.187260000 | 23.875760000 | 19.862890000 |
| N | 22.454220000 | 23.111680000 | 18.731380000 |
| C | 22.268980000 | 23.682600000 | 17.508540000 |

|   |              |              |              |
|---|--------------|--------------|--------------|
| H | 22.487680000 | 23.031860000 | 16.640890000 |
| C | 21.838560000 | 25.002910000 | 17.333350000 |
| C | 21.595090000 | 25.796200000 | 18.478200000 |
| H | 21.272880000 | 26.850270000 | 18.379590000 |
| C | 21.774270000 | 25.224900000 | 19.742180000 |
| H | 21.611250000 | 25.830430000 | 20.653320000 |
| C | 27.110420000 | 23.361440000 | 19.605770000 |
| C | 27.656590000 | 23.295610000 | 18.304510000 |
| C | 25.853360000 | 22.790820000 | 19.837710000 |
| C | 26.919660000 | 22.654600000 | 17.301470000 |
| N | 25.137620000 | 22.140730000 | 18.874770000 |
| C | 25.674340000 | 22.054220000 | 17.598250000 |
| H | 28.649780000 | 23.727410000 | 18.075950000 |
| H | 25.383460000 | 22.831310000 | 20.838430000 |
| H | 27.317700000 | 22.606700000 | 16.272360000 |
| C | 24.905540000 | 21.239980000 | 16.644390000 |
| N | 23.719890000 | 20.713900000 | 17.133130000 |
| C | 23.019450000 | 19.843450000 | 16.352640000 |
| H | 22.096160000 | 19.430320000 | 16.801310000 |
| C | 23.432520000 | 19.467630000 | 15.068190000 |
| C | 24.622940000 | 20.023580000 | 14.548240000 |
| H | 24.988300000 | 19.745880000 | 13.540870000 |
| C | 25.353680000 | 20.916210000 | 15.342270000 |
| H | 26.297990000 | 21.344830000 | 14.960480000 |
| H | 21.708500000 | 25.405730000 | 16.311900000 |
| H | 27.649920000 | 23.852940000 | 20.437160000 |
| H | 22.824700000 | 18.743900000 | 14.493530000 |

|    |              |              |              |
|----|--------------|--------------|--------------|
| Ru | 23.291800000 | 21.243240000 | 19.121240000 |
| C  | 27.470060000 | 17.936560000 | 20.551850000 |
| H  | 27.940190000 | 18.816810000 | 20.059550000 |
| H  | 27.655060000 | 18.054910000 | 21.648090000 |
| H  | 18.476820000 | 17.713620000 | 19.690740000 |
| Ag | 33.276640000 | 15.227890000 | 19.122800000 |
| Ag | 32.970330000 | 12.442850000 | 19.123070000 |
| Ag | 33.103120000 | 13.938180000 | 16.612550000 |
| Ag | 31.810240000 | 14.033150000 | 21.250590000 |
| Ag | 30.780060000 | 14.163800000 | 18.336560000 |
| Ag | 33.387280000 | 16.422920000 | 21.654040000 |
| Ag | 33.516190000 | 18.024420000 | 19.093780000 |
| Ag | 34.889720000 | 16.385220000 | 17.108670000 |
| Ag | 31.781500000 | 16.693790000 | 17.247800000 |
| Ag | 34.725950000 | 13.900520000 | 21.144630000 |
| Ag | 35.857750000 | 16.214690000 | 19.804720000 |
| Ag | 30.954500000 | 16.672970000 | 19.998730000 |
| Ag | 35.555780000 | 13.790270000 | 18.183810000 |
| Ag | 28.702230000 | 16.226650000 | 17.657670000 |
| Ag | 33.166990000 | 11.159180000 | 21.794270000 |
| Ag | 34.268450000 | 19.039560000 | 15.980000000 |
| Ag | 36.503780000 | 16.055490000 | 22.692830000 |
| Ag | 34.772380000 | 11.240360000 | 16.867530000 |
| Ag | 30.054670000 | 11.805760000 | 20.458030000 |
| Ag | 36.193990000 | 19.134410000 | 18.379870000 |
| Ag | 37.595680000 | 13.693520000 | 20.494940000 |
| Ag | 32.469960000 | 19.235340000 | 21.606730000 |

|    |              |              |              |
|----|--------------|--------------|--------------|
| Ag | 30.570720000 | 16.522330000 | 22.923150000 |
| Ag | 35.671550000 | 13.991910000 | 15.042140000 |
| Ag | 30.873200000 | 15.162260000 | 14.947250000 |
| S  | 31.133160000 | 18.786290000 | 23.594640000 |
| S  | 33.889190000 | 10.118690000 | 18.845820000 |
| S  | 34.767510000 | 17.637190000 | 23.368130000 |
| S  | 32.310290000 | 17.880920000 | 15.068340000 |
| S  | 32.646830000 | 13.722380000 | 14.116370000 |
| S  | 35.490060000 | 11.794480000 | 22.262550000 |
| S  | 29.896380000 | 14.191850000 | 22.905770000 |
| S  | 28.333340000 | 16.376790000 | 20.067530000 |
| S  | 31.037600000 | 9.957220000  | 21.675280000 |
| S  | 37.525500000 | 12.253560000 | 18.529070000 |
| S  | 28.592820000 | 13.084390000 | 18.991250000 |
| S  | 35.655120000 | 16.417830000 | 14.714590000 |
| S  | 37.394680000 | 18.146580000 | 20.288140000 |
| S  | 33.993010000 | 20.343200000 | 20.038310000 |
| S  | 28.762130000 | 16.368470000 | 15.227920000 |
| S  | 36.252730000 | 20.418590000 | 16.278950000 |
| S  | 38.616920000 | 14.888120000 | 22.350720000 |
| S  | 35.750130000 | 11.577820000 | 14.670740000 |
| C  | 29.645640000 | 19.774650000 | 23.597530000 |
| C  | 29.714350000 | 21.192530000 | 23.446770000 |
| C  | 28.522010000 | 21.938410000 | 23.576250000 |
| C  | 27.273810000 | 21.350810000 | 23.864320000 |
| C  | 27.227720000 | 19.945810000 | 24.021610000 |
| C  | 28.393120000 | 19.175880000 | 23.890370000 |

|   |              |              |              |
|---|--------------|--------------|--------------|
| C | 31.012050000 | 21.906130000 | 23.163320000 |
| C | 26.032790000 | 22.199890000 | 24.013460000 |
| C | 32.579180000 | 9.082160000  | 18.194670000 |
| C | 32.881490000 | 7.742120000  | 17.811090000 |
| C | 31.813430000 | 6.902310000  | 17.421720000 |
| C | 30.469760000 | 7.334220000  | 17.396960000 |
| C | 30.201390000 | 8.677490000  | 17.743120000 |
| C | 31.242270000 | 9.535550000  | 18.126030000 |
| C | 34.300600000 | 7.226220000  | 17.808380000 |
| C | 29.342170000 | 6.406990000  | 16.998940000 |
| C | 34.313190000 | 17.100600000 | 25.016010000 |
| C | 35.059540000 | 17.594720000 | 26.128030000 |
| C | 34.655550000 | 17.208890000 | 27.425090000 |
| C | 33.536520000 | 16.381260000 | 27.666370000 |
| C | 32.812840000 | 15.908290000 | 26.549080000 |
| C | 33.205580000 | 16.254510000 | 25.247270000 |
| C | 36.241130000 | 18.516370000 | 25.936130000 |
| C | 33.103260000 | 16.034120000 | 29.074410000 |
| C | 31.231210000 | 19.235720000 | 14.641350000 |
| C | 31.499510000 | 19.974460000 | 13.448710000 |
| C | 30.642040000 | 21.046070000 | 13.118740000 |
| C | 29.528940000 | 21.406080000 | 13.907990000 |
| C | 29.278810000 | 20.647860000 | 15.075450000 |
| C | 30.118440000 | 19.583920000 | 15.440350000 |
| C | 32.667480000 | 19.624740000 | 12.558870000 |
| C | 28.632350000 | 22.559890000 | 13.508950000 |
| C | 31.860050000 | 12.136050000 | 13.825750000 |

|   |              |              |              |
|---|--------------|--------------|--------------|
| C | 31.324280000 | 11.851040000 | 12.531660000 |
| C | 30.803690000 | 10.559620000 | 12.295950000 |
| C | 30.809740000 | 9.540340000  | 13.275560000 |
| C | 31.338850000 | 9.849090000  | 14.545730000 |
| C | 31.845320000 | 11.129340000 | 14.817370000 |
| C | 31.333070000 | 12.880550000 | 11.423730000 |
| C | 30.287000000 | 8.153550000  | 12.971230000 |
| C | 35.525920000 | 12.038380000 | 24.038050000 |
| C | 35.857910000 | 10.927450000 | 24.872100000 |
| C | 35.956820000 | 11.142480000 | 26.263500000 |
| C | 35.757530000 | 12.407530000 | 26.860290000 |
| C | 35.428080000 | 13.489580000 | 26.015770000 |
| C | 35.308150000 | 13.303770000 | 24.628510000 |
| C | 36.131730000 | 9.562620000  | 24.287210000 |
| C | 35.929250000 | 12.607500000 | 28.350540000 |
| C | 30.472260000 | 13.615950000 | 24.505620000 |
| C | 29.677880000 | 13.859370000 | 25.665130000 |
| C | 30.097210000 | 13.301510000 | 26.893370000 |
| C | 31.263470000 | 12.514910000 | 27.018280000 |
| C | 32.047140000 | 12.309250000 | 25.861400000 |
| C | 31.655930000 | 12.852700000 | 24.629040000 |
| C | 28.430330000 | 14.705620000 | 25.598550000 |
| C | 31.652930000 | 11.879470000 | 28.334380000 |
| C | 30.284650000 | 9.941190000  | 23.298560000 |
| C | 30.889940000 | 9.186690000  | 24.345830000 |
| C | 30.227870000 | 9.118210000  | 25.590870000 |
| C | 29.000990000 | 9.767500000  | 25.844150000 |

|   |              |              |              |
|---|--------------|--------------|--------------|
| C | 28.415410000 | 10.499200000 | 24.786080000 |
| C | 29.044480000 | 10.580540000 | 23.534750000 |
| C | 32.215550000 | 8.494340000  | 24.149680000 |
| C | 28.351170000 | 9.719150000  | 27.208570000 |
| C | 38.957800000 | 12.863930000 | 17.631730000 |
| C | 40.231470000 | 12.261280000 | 17.870710000 |
| C | 41.330440000 | 12.693200000 | 17.098520000 |
| C | 41.221600000 | 13.679380000 | 16.092420000 |
| C | 39.957300000 | 14.271230000 | 15.885840000 |
| C | 38.847430000 | 13.873440000 | 16.650030000 |
| C | 40.421660000 | 11.202270000 | 18.929500000 |
| C | 42.415350000 | 14.074150000 | 15.250100000 |
| C | 28.143620000 | 11.879300000 | 17.739000000 |
| C | 27.264540000 | 10.797440000 | 18.060860000 |
| C | 26.824380000 | 9.962250000  | 17.009630000 |
| C | 27.222260000 | 10.144330000 | 15.665100000 |
| C | 28.112650000 | 11.200780000 | 15.381480000 |
| C | 28.564910000 | 12.054230000 | 16.401080000 |
| C | 26.815000000 | 10.530160000 | 19.478240000 |
| C | 26.737370000 | 9.216840000  | 14.572030000 |
| C | 37.373790000 | 16.912350000 | 14.619710000 |
| C | 38.029120000 | 16.891570000 | 13.353000000 |
| C | 39.353090000 | 17.380380000 | 13.280490000 |
| C | 40.042270000 | 17.895710000 | 14.399470000 |
| C | 39.370620000 | 17.905180000 | 15.643850000 |
| C | 38.061810000 | 17.413450000 | 15.749290000 |
| C | 37.329150000 | 16.394170000 | 12.110560000 |

|   |              |              |              |
|---|--------------|--------------|--------------|
| C | 41.454580000 | 18.425920000 | 14.280810000 |
| C | 39.020760000 | 17.872160000 | 19.580830000 |
| C | 39.908380000 | 18.981620000 | 19.417080000 |
| C | 41.215440000 | 18.727400000 | 18.952930000 |
| C | 41.683000000 | 17.428700000 | 18.645810000 |
| C | 40.785460000 | 16.351440000 | 18.801260000 |
| C | 39.473820000 | 16.575080000 | 19.252430000 |
| C | 39.461310000 | 20.398280000 | 19.686350000 |
| C | 43.096390000 | 17.212030000 | 18.152720000 |
| C | 32.983930000 | 21.564790000 | 19.205370000 |
| C | 32.992900000 | 22.904960000 | 19.702190000 |
| C | 32.285730000 | 23.890460000 | 18.982450000 |
| C | 31.600010000 | 23.614030000 | 17.778380000 |
| C | 31.591660000 | 22.279930000 | 17.317590000 |
| C | 32.263810000 | 21.268700000 | 18.026190000 |
| C | 33.779740000 | 23.284770000 | 20.933790000 |
| C | 30.957790000 | 24.724240000 | 16.972700000 |
| C | 27.609070000 | 15.237350000 | 14.449270000 |
| C | 26.209870000 | 15.307240000 | 14.708090000 |
| C | 25.351980000 | 14.480620000 | 13.951990000 |
| C | 25.812010000 | 13.577190000 | 12.967920000 |
| C | 27.201180000 | 13.536280000 | 12.720210000 |
| C | 28.078340000 | 14.355890000 | 13.446660000 |
| C | 25.653810000 | 16.232100000 | 15.763370000 |
| C | 24.853050000 | 12.658150000 | 12.245070000 |
| C | 35.779530000 | 22.100540000 | 16.671200000 |
| C | 35.016500000 | 22.878500000 | 15.750580000 |



|   |              |              |              |
|---|--------------|--------------|--------------|
| C | 34.824150000 | 24.249360000 | 16.028340000 |
| C | 35.356460000 | 24.884420000 | 17.168920000 |
| C | 36.113570000 | 24.095490000 | 18.064650000 |
| C | 36.316680000 | 22.728520000 | 17.821760000 |
| C | 34.412430000 | 22.270070000 | 14.510600000 |
| C | 35.096770000 | 26.349380000 | 17.441190000 |
| C | 38.881360000 | 13.609030000 | 23.574180000 |
| C | 38.945230000 | 13.932200000 | 24.961160000 |
| C | 39.254970000 | 12.901690000 | 25.874160000 |
| C | 39.513860000 | 11.573990000 | 25.476400000 |
| C | 39.466970000 | 11.281960000 | 24.094260000 |
| C | 39.151890000 | 12.281250000 | 23.161520000 |
| C | 38.668670000 | 15.328090000 | 25.459080000 |
| C | 39.826360000 | 10.500220000 | 26.495080000 |
| C | 37.426250000 | 10.974460000 | 14.853960000 |
| C | 38.459230000 | 11.442570000 | 13.987980000 |
| C | 39.739900000 | 10.861750000 | 14.098770000 |
| C | 40.043820000 | 9.837800000  | 15.021600000 |
| C | 39.004430000 | 9.386640000  | 15.864800000 |
| C | 37.719870000 | 9.947680000  | 15.782950000 |
| C | 38.209880000 | 12.535260000 | 12.979150000 |
| C | 41.443890000 | 9.275710000  | 15.126040000 |
| H | 28.578490000 | 23.041650000 | 23.463380000 |
| H | 26.268020000 | 19.445170000 | 24.264780000 |
| H | 28.349790000 | 18.077200000 | 24.040430000 |
| H | 31.796590000 | 21.641710000 | 23.909490000 |
| H | 30.870960000 | 23.009520000 | 23.169450000 |

|   |              |              |              |
|---|--------------|--------------|--------------|
| H | 31.421370000 | 21.615250000 | 22.162450000 |
| H | 26.259540000 | 23.279160000 | 23.866090000 |
| H | 25.571550000 | 22.087230000 | 25.023290000 |
| H | 25.247510000 | 21.908490000 | 23.278550000 |
| H | 32.050700000 | 5.858210000  | 17.130940000 |
| H | 29.166360000 | 9.068820000  | 17.703270000 |
| H | 31.015220000 | 10.593610000 | 18.377850000 |
| H | 34.931120000 | 7.799730000  | 17.086760000 |
| H | 34.338820000 | 6.151740000  | 17.522900000 |
| H | 34.780790000 | 7.349380000  | 18.806410000 |
| H | 28.839860000 | 6.759270000  | 16.066920000 |
| H | 28.554110000 | 6.365230000  | 17.786720000 |
| H | 29.703300000 | 5.370470000  | 16.821230000 |
| H | 35.244130000 | 17.584740000 | 28.287500000 |
| H | 31.940220000 | 15.242160000 | 26.691430000 |
| H | 32.645020000 | 15.848780000 | 24.378490000 |
| H | 37.012850000 | 18.059600000 | 25.272260000 |
| H | 36.716500000 | 18.764660000 | 26.910190000 |
| H | 35.933520000 | 19.465790000 | 25.438620000 |
| H | 33.960510000 | 16.038720000 | 29.784600000 |
| H | 32.620920000 | 15.031570000 | 29.112940000 |
| H | 32.356920000 | 16.769700000 | 29.459580000 |
| H | 30.858770000 | 21.627250000 | 12.198840000 |
| H | 28.433440000 | 20.904440000 | 15.742520000 |
| H | 29.926740000 | 19.010620000 | 16.369780000 |
| H | 33.611900000 | 19.548030000 | 13.148280000 |
| H | 32.802810000 | 20.381560000 | 11.756700000 |

|   |              |              |              |
|---|--------------|--------------|--------------|
| H | 32.523680000 | 18.623210000 | 12.089010000 |
| H | 28.493850000 | 23.291290000 | 14.341130000 |
| H | 27.615820000 | 22.212380000 | 13.204200000 |
| H | 29.053390000 | 23.122290000 | 12.646870000 |
| H | 30.387750000 | 10.341140000 | 11.289660000 |
| H | 31.340800000 | 9.083670000  | 15.345340000 |
| H | 32.237940000 | 11.361500000 | 15.830230000 |
| H | 30.928090000 | 13.862890000 | 11.762680000 |
| H | 30.735560000 | 12.532830000 | 10.551760000 |
| H | 32.371030000 | 13.086460000 | 11.072810000 |
| H | 29.294400000 | 8.183570000  | 12.466450000 |
| H | 30.185630000 | 7.553920000  | 13.902540000 |
| H | 30.980790000 | 7.600980000  | 12.294460000 |
| H | 36.220540000 | 10.278020000 | 26.907590000 |
| H | 35.244730000 | 14.493180000 | 26.445830000 |
| H | 35.033250000 | 14.162470000 | 23.979870000 |
| H | 35.289690000 | 9.212790000  | 23.644990000 |
| H | 36.302920000 | 8.810720000  | 25.089230000 |
| H | 37.030570000 | 9.589770000  | 23.627510000 |
| H | 35.552710000 | 11.735820000 | 28.933520000 |
| H | 35.390870000 | 13.517560000 | 28.698730000 |
| H | 37.005450000 | 12.736860000 | 28.620860000 |
| H | 29.478540000 | 13.492940000 | 27.795130000 |
| H | 32.980760000 | 11.715890000 | 25.924100000 |
| H | 32.276280000 | 12.669740000 | 23.725780000 |
| H | 28.677860000 | 15.743860000 | 25.267720000 |
| H | 27.931300000 | 14.762330000 | 26.590710000 |

|   |              |              |              |
|---|--------------|--------------|--------------|
| H | 27.705540000 | 14.305230000 | 24.852070000 |
| H | 31.178110000 | 12.393550000 | 29.200280000 |
| H | 32.756730000 | 11.896230000 | 28.480150000 |
| H | 31.337000000 | 10.808600000 | 28.367720000 |
| H | 30.703130000 | 8.528670000  | 26.402400000 |
| H | 27.452440000 | 11.024850000 | 24.943960000 |
| H | 28.574950000 | 11.165660000 | 22.718360000 |
| H | 32.177530000 | 7.766070000  | 23.306500000 |
| H | 32.531960000 | 7.958270000  | 25.071210000 |
| H | 33.010580000 | 9.235180000  | 23.883580000 |
| H | 28.785560000 | 8.914210000  | 27.841720000 |
| H | 27.253240000 | 9.545290000  | 27.138090000 |
| H | 28.492180000 | 10.685500000 | 27.750600000 |
| H | 42.320090000 | 12.230540000 | 17.298050000 |
| H | 39.834910000 | 15.064480000 | 15.123290000 |
| H | 37.863270000 | 14.360680000 | 16.484580000 |
| H | 40.226950000 | 11.618230000 | 19.947110000 |
| H | 41.460340000 | 10.803830000 | 18.910640000 |
| H | 39.711260000 | 10.355780000 | 18.789020000 |
| H | 43.330850000 | 14.223040000 | 15.868590000 |
| H | 42.217510000 | 15.015320000 | 14.690310000 |
| H | 42.658230000 | 13.283200000 | 14.500290000 |
| H | 26.133320000 | 9.129530000  | 17.258720000 |
| H | 28.464600000 | 11.359730000 | 14.344700000 |
| H | 29.258430000 | 12.885280000 | 16.156380000 |
| H | 27.694060000 | 10.322490000 | 20.138640000 |
| H | 26.136290000 | 9.649980000  | 19.522380000 |

|   |              |              |              |
|---|--------------|--------------|--------------|
| H | 26.285750000 | 11.406330000 | 19.920050000 |
| H | 27.282860000 | 8.242590000  | 14.588500000 |
| H | 26.896260000 | 9.663710000  | 13.565400000 |
| H | 25.654400000 | 8.979990000  | 14.678930000 |
| H | 39.863390000 | 17.368620000 | 12.294670000 |
| H | 39.876770000 | 18.295380000 | 16.548680000 |
| H | 37.548620000 | 17.421090000 | 16.733530000 |
| H | 36.896840000 | 15.376670000 | 12.259740000 |
| H | 38.028930000 | 16.358400000 | 11.246830000 |
| H | 36.470680000 | 17.054290000 | 11.841680000 |
| H | 42.157700000 | 17.848390000 | 14.926780000 |
| H | 41.517920000 | 19.488500000 | 14.612810000 |
| H | 41.830410000 | 18.369660000 | 13.235440000 |
| H | 41.900490000 | 19.590980000 | 18.821620000 |
| H | 41.107810000 | 15.320220000 | 18.556540000 |
| H | 38.773100000 | 15.720560000 | 19.354800000 |
| H | 38.672220000 | 20.697520000 | 18.953440000 |
| H | 40.309750000 | 21.110790000 | 19.589320000 |
| H | 39.008340000 | 20.506680000 | 20.698430000 |
| H | 43.310740000 | 17.829820000 | 17.249040000 |
| H | 43.272690000 | 16.146250000 | 17.888160000 |
| H | 43.848530000 | 17.504080000 | 18.922560000 |
| H | 32.299720000 | 24.929590000 | 19.372900000 |
| H | 31.065040000 | 22.020500000 | 16.378530000 |
| H | 32.257450000 | 20.226630000 | 17.642880000 |
| H | 33.579520000 | 22.591450000 | 21.782570000 |
| H | 33.544710000 | 24.325300000 | 21.249690000 |

|   |              |              |              |
|---|--------------|--------------|--------------|
| H | 34.874640000 | 23.219680000 | 20.733230000 |
| H | 30.337840000 | 25.404620000 | 17.603310000 |
| H | 30.316870000 | 24.317070000 | 16.157910000 |
| H | 31.731960000 | 25.364600000 | 16.486330000 |
| H | 24.262560000 | 14.552650000 | 14.143060000 |
| H | 27.614150000 | 12.846490000 | 11.955590000 |
| H | 29.167440000 | 14.310330000 | 13.241600000 |
| H | 26.095560000 | 16.002630000 | 16.765870000 |
| H | 24.548220000 | 16.136100000 | 15.840740000 |
| H | 25.910500000 | 17.296960000 | 15.549190000 |
| H | 24.615390000 | 11.765390000 | 12.869580000 |
| H | 25.280130000 | 12.287790000 | 11.286560000 |
| H | 23.886780000 | 13.167320000 | 12.019470000 |
| H | 34.236180000 | 24.851010000 | 15.304360000 |
| H | 36.562890000 | 24.561360000 | 18.964150000 |
| H | 36.915060000 | 22.123940000 | 18.531970000 |
| H | 35.184750000 | 21.774970000 | 13.877320000 |
| H | 33.886000000 | 23.038990000 | 13.902300000 |
| H | 33.672880000 | 21.476720000 | 14.781780000 |
| H | 34.748490000 | 26.879530000 | 16.527340000 |
| H | 36.008040000 | 26.870550000 | 17.813920000 |
| H | 34.308520000 | 26.478810000 | 18.222320000 |
| H | 39.287020000 | 13.153850000 | 26.954100000 |
| H | 39.669790000 | 10.252400000 | 23.737800000 |
| H | 39.098330000 | 12.031200000 | 22.082380000 |
| H | 39.362390000 | 16.071560000 | 25.001620000 |
| H | 38.761070000 | 15.384450000 | 26.565700000 |

|   |              |              |              |
|---|--------------|--------------|--------------|
| H | 37.635280000 | 15.649680000 | 25.178450000 |
| H | 40.917910000 | 10.268840000 | 26.531930000 |
| H | 39.299960000 | 9.548640000  | 26.252540000 |
| H | 39.516850000 | 10.812960000 | 27.517210000 |
| H | 40.540140000 | 11.233680000 | 13.425670000 |
| H | 39.200350000 | 8.580380000  | 16.600050000 |
| H | 36.916970000 | 9.584820000  | 16.455900000 |
| H | 37.426630000 | 12.243610000 | 12.241310000 |
| H | 39.140950000 | 12.792300000 | 12.428430000 |
| H | 37.836160000 | 13.461080000 | 13.482470000 |
| H | 41.966730000 | 9.294290000  | 14.143150000 |
| H | 41.440510000 | 8.226690000  | 15.497500000 |
| H | 42.061000000 | 9.875890000  | 15.837670000 |

#### C Isomer

|    |              |              |              |
|----|--------------|--------------|--------------|
| Ag | 14.642820000 | 16.559010000 | 20.590430000 |
| Ag | 12.058570000 | 16.707390000 | 21.743390000 |
| Ag | 12.991500000 | 14.278890000 | 20.468650000 |
| Ag | 13.293400000 | 19.045360000 | 20.537060000 |
| Ag | 12.416380000 | 16.670260000 | 18.869270000 |
| Ag | 16.270650000 | 18.829340000 | 20.660790000 |
| Ag | 17.137330000 | 16.294790000 | 19.267280000 |
| Ag | 16.023770000 | 14.118510000 | 20.792720000 |
| Ag | 14.757260000 | 15.109270000 | 18.150040000 |
| Ag | 14.499860000 | 18.105230000 | 22.954250000 |
| Ag | 16.800470000 | 16.439210000 | 22.381250000 |
| Ag | 15.030200000 | 18.001810000 | 18.171070000 |
| Ag | 14.303600000 | 15.017460000 | 22.956820000 |

|    |              |              |              |
|----|--------------|--------------|--------------|
| Ag | 12.887820000 | 16.637370000 | 15.970280000 |
| Ag | 11.382020000 | 19.191960000 | 23.196600000 |
| Ag | 17.417900000 | 13.250740000 | 18.315110000 |
| Ag | 17.339560000 | 19.227340000 | 23.608550000 |
| Ag | 11.516180000 | 13.989720000 | 23.252120000 |
| Ag | 10.397960000 | 18.805890000 | 19.873980000 |
| Ag | 19.142930000 | 14.714740000 | 20.840030000 |
| Ag | 15.645140000 | 16.616000000 | 25.215360000 |
| Ag | 17.885170000 | 19.236500000 | 18.238200000 |
| Ag | 14.892160000 | 20.915040000 | 18.773660000 |
| Ag | 14.134840000 | 11.971420000 | 22.064640000 |
| Ag | 12.432680000 | 13.463280000 | 17.377900000 |
| S  | 17.132620000 | 21.550650000 | 18.060060000 |
| S  | 10.352070000 | 16.114260000 | 23.502820000 |
| S  | 17.579630000 | 20.749860000 | 21.727760000 |
| S  | 15.443460000 | 13.015650000 | 16.913060000 |
| S  | 12.221930000 | 12.144210000 | 19.416130000 |
| S  | 13.149460000 | 19.005100000 | 24.876760000 |
| S  | 12.510560000 | 21.099060000 | 19.288550000 |
| S  | 14.055690000 | 18.811130000 | 16.007520000 |
| S  | 9.324420000  | 19.553730000 | 21.928970000 |
| S  | 14.071910000 | 14.771830000 | 25.459290000 |
| S  | 10.603540000 | 17.901010000 | 17.601000000 |
| S  | 16.175780000 | 11.614210000 | 20.751400000 |
| S  | 19.281410000 | 16.250070000 | 22.734010000 |
| S  | 19.307580000 | 17.246020000 | 18.376070000 |
| S  | 12.279190000 | 14.421810000 | 15.143410000 |



|   |              |              |              |
|---|--------------|--------------|--------------|
| S | 19.571710000 | 12.827450000 | 19.373390000 |
| S | 17.409750000 | 18.190950000 | 25.801720000 |
| S | 12.051670000 | 11.619140000 | 23.285280000 |
| C | 16.964820000 | 21.874760000 | 16.300530000 |
| C | 18.119720000 | 21.909930000 | 15.465510000 |
| C | 17.953670000 | 22.206020000 | 14.096780000 |
| C | 16.695310000 | 22.475090000 | 13.519560000 |
| C | 15.568090000 | 22.459140000 | 14.369740000 |
| C | 15.699530000 | 22.163340000 | 15.735540000 |
| C | 19.493120000 | 21.595170000 | 16.004070000 |
| C | 16.550480000 | 22.715080000 | 12.034410000 |
| C | 8.755280000  | 15.828710000 | 22.729800000 |
| C | 7.686050000  | 15.319420000 | 23.526100000 |
| C | 6.408330000  | 15.209720000 | 22.933880000 |
| C | 6.145450000  | 15.581230000 | 21.596530000 |
| C | 7.223730000  | 16.066150000 | 20.824090000 |
| C | 8.505740000  | 16.179000000 | 21.383780000 |
| C | 7.903100000  | 14.896830000 | 24.959520000 |
| C | 4.764110000  | 15.429410000 | 20.997390000 |
| C | 15.941160000 | 13.404770000 | 15.236860000 |
| C | 16.433020000 | 12.353610000 | 14.406970000 |
| C | 16.760510000 | 12.661900000 | 13.068720000 |
| C | 16.589540000 | 13.948810000 | 12.512900000 |
| C | 16.081190000 | 14.967460000 | 13.349980000 |
| C | 15.773410000 | 14.698440000 | 14.692810000 |
| C | 16.566770000 | 10.939630000 | 14.918920000 |
| C | 16.955770000 | 14.231160000 | 11.072130000 |

|   |              |              |              |
|---|--------------|--------------|--------------|
| C | 10.453530000 | 11.953570000 | 19.648160000 |
| C | 9.784800000  | 10.884280000 | 18.978270000 |
| C | 8.409900000  | 10.697850000 | 19.230230000 |
| C | 7.676320000  | 11.514010000 | 20.122640000 |
| C | 8.357540000  | 12.567280000 | 20.767750000 |
| C | 9.722980000  | 12.787430000 | 20.522070000 |
| C | 10.522440000 | 9.964090000  | 18.035300000 |
| C | 6.207640000  | 11.262220000 | 20.384900000 |
| C | 13.589710000 | 20.712960000 | 25.191370000 |
| C | 12.914730000 | 21.416310000 | 26.234570000 |
| C | 13.313670000 | 22.740970000 | 26.513140000 |
| C | 14.351590000 | 23.395150000 | 25.813000000 |
| C | 14.996960000 | 22.682050000 | 24.778850000 |
| C | 14.618330000 | 21.364920000 | 24.474490000 |
| C | 11.818110000 | 20.768160000 | 27.044590000 |
| C | 14.785010000 | 24.793710000 | 26.193110000 |
| C | 12.485880000 | 22.514640000 | 20.390950000 |
| C | 12.428070000 | 23.826300000 | 19.834540000 |
| C | 12.294110000 | 24.919530000 | 20.717500000 |
| C | 12.211170000 | 24.764500000 | 22.117610000 |
| C | 12.291480000 | 23.456440000 | 22.644390000 |
| C | 12.430630000 | 22.351310000 | 21.792670000 |
| C | 12.513080000 | 24.057580000 | 18.345130000 |
| C | 12.009730000 | 25.951730000 | 23.032030000 |
| C | 15.281670000 | 18.656460000 | 14.708640000 |
| C | 14.880160000 | 18.841540000 | 13.349870000 |
| C | 15.866660000 | 18.773110000 | 12.342240000 |

|   |              |              |              |
|---|--------------|--------------|--------------|
| C | 17.233680000 | 18.549260000 | 12.621610000 |
| C | 17.610240000 | 18.383600000 | 13.971380000 |
| C | 16.647060000 | 18.426770000 | 14.992970000 |
| C | 13.437460000 | 19.099000000 | 12.990560000 |
| C | 18.251240000 | 18.441450000 | 11.506740000 |
| C | 9.057250000  | 21.314140000 | 21.743960000 |
| C | 8.824010000  | 22.124500000 | 22.893550000 |
| C | 8.520830000  | 23.489020000 | 22.700500000 |
| C | 8.441980000  | 24.083810000 | 21.424820000 |
| C | 8.669260000  | 23.259550000 | 20.298880000 |
| C | 8.968500000  | 21.898570000 | 20.457000000 |
| C | 8.924480000  | 21.563820000 | 24.289300000 |
| C | 8.155440000  | 25.559700000 | 21.265670000 |
| C | 15.187360000 | 13.494660000 | 26.053690000 |
| C | 15.399790000 | 13.358830000 | 27.459940000 |
| C | 16.242120000 | 12.320260000 | 27.912420000 |
| C | 16.872050000 | 11.406820000 | 27.037380000 |
| C | 16.642100000 | 11.556620000 | 25.653750000 |
| C | 15.818330000 | 12.588020000 | 25.172290000 |
| C | 14.765500000 | 14.302520000 | 28.452890000 |
| C | 17.760200000 | 10.298380000 | 27.558040000 |
| C | 9.217630000  | 16.768200000 | 17.485450000 |
| C | 7.982050000  | 17.237450000 | 16.949060000 |
| C | 6.927330000  | 16.310850000 | 16.796880000 |
| C | 7.048080000  | 14.948870000 | 17.148760000 |
| C | 8.280710000  | 14.509040000 | 17.678640000 |
| C | 9.344290000  | 15.407260000 | 17.846310000 |

|   |              |              |              |
|---|--------------|--------------|--------------|
| C | 7.792030000  | 18.681470000 | 16.550820000 |
| C | 5.892040000  | 13.987490000 | 16.986460000 |
| C | 17.446970000 | 11.062560000 | 21.887520000 |
| C | 17.681110000 | 9.660070000  | 22.009540000 |
| C | 18.749910000 | 9.229740000  | 22.824530000 |
| C | 19.597880000 | 10.123560000 | 23.515170000 |
| C | 19.334360000 | 11.506190000 | 23.396290000 |
| C | 18.270640000 | 11.963340000 | 22.600910000 |
| C | 16.822800000 | 8.649290000  | 21.286290000 |
| C | 20.766100000 | 9.614930000  | 24.332100000 |
| C | 19.761050000 | 15.199600000 | 24.102510000 |
| C | 21.124170000 | 14.794730000 | 24.234310000 |
| C | 21.493890000 | 14.048040000 | 25.372190000 |
| C | 20.573300000 | 13.689050000 | 26.383530000 |
| C | 19.229010000 | 14.086840000 | 26.221250000 |
| C | 18.829790000 | 14.823550000 | 25.094540000 |
| C | 22.151610000 | 15.130060000 | 23.179540000 |
| C | 21.017780000 | 12.913780000 | 27.604440000 |
| C | 19.687570000 | 16.767250000 | 16.696320000 |
| C | 20.787530000 | 17.392390000 | 16.036020000 |
| C | 21.124280000 | 16.951110000 | 14.739380000 |
| C | 20.442640000 | 15.897150000 | 14.089990000 |
| C | 19.366640000 | 15.287570000 | 14.770350000 |
| C | 18.986360000 | 15.725410000 | 16.049640000 |
| C | 21.614110000 | 18.462470000 | 16.710730000 |
| C | 20.882930000 | 15.408960000 | 12.728030000 |
| C | 10.558770000 | 14.166820000 | 14.708340000 |

|   |              |              |              |
|---|--------------|--------------|--------------|
| C | 9.792770000  | 15.114900000 | 13.968930000 |
| C | 8.499050000  | 14.739950000 | 13.544400000 |
| C | 7.937800000  | 13.471300000 | 13.802870000 |
| C | 8.713500000  | 12.551890000 | 14.542550000 |
| C | 9.995330000  | 12.898890000 | 14.991040000 |
| C | 10.328060000 | 16.481640000 | 13.617280000 |
| C | 6.570190000  | 13.096790000 | 13.277380000 |
| C | 20.815580000 | 13.290180000 | 18.175420000 |
| C | 21.027300000 | 12.467520000 | 17.029870000 |
| C | 22.059650000 | 12.817280000 | 16.133150000 |
| C | 22.887790000 | 13.942860000 | 16.320690000 |
| C | 22.668200000 | 14.735820000 | 17.469220000 |
| C | 21.654300000 | 14.409130000 | 18.380940000 |
| C | 20.138240000 | 11.283760000 | 16.742840000 |
| C | 23.944200000 | 14.332730000 | 15.314380000 |
| C | 16.591470000 | 19.265890000 | 26.980480000 |
| C | 17.064830000 | 20.587900000 | 27.222380000 |
| C | 16.428720000 | 21.354380000 | 28.223850000 |
| C | 15.356020000 | 20.867480000 | 28.999520000 |
| C | 14.919110000 | 19.545770000 | 28.756810000 |
| C | 15.522640000 | 18.763240000 | 27.762170000 |
| C | 18.194360000 | 21.182070000 | 26.418680000 |
| C | 14.685360000 | 21.724800000 | 30.050330000 |
| C | 12.409940000 | 11.285070000 | 25.007940000 |
| C | 13.236560000 | 10.184120000 | 25.381320000 |
| C | 13.407870000 | 9.911870000  | 26.755280000 |
| C | 12.796470000 | 10.673840000 | 27.772440000 |

|   |              |              |              |
|---|--------------|--------------|--------------|
| C | 11.970010000 | 11.749350000 | 27.378670000 |
| C | 11.783920000 | 12.051100000 | 26.021740000 |
| C | 13.937700000 | 9.326990000  | 24.357290000 |
| C | 13.050290000 | 10.374470000 | 29.232300000 |
| H | 18.854470000 | 22.219110000 | 13.448510000 |
| H | 14.563070000 | 22.671700000 | 13.953620000 |
| H | 14.796230000 | 22.129440000 | 16.378810000 |
| H | 19.775410000 | 22.275670000 | 16.842080000 |
| H | 20.259260000 | 21.669600000 | 15.199970000 |
| H | 19.520010000 | 20.557640000 | 16.420370000 |
| H | 17.478350000 | 23.137570000 | 11.587750000 |
| H | 15.710930000 | 23.410880000 | 11.809520000 |
| H | 16.334370000 | 21.755190000 | 11.505850000 |
| H | 5.575160000  | 14.822910000 | 23.557060000 |
| H | 7.067330000  | 16.354920000 | 19.766020000 |
| H | 9.343060000  | 16.554550000 | 20.759270000 |
| H | 8.641580000  | 14.061170000 | 25.020100000 |
| H | 6.951790000  | 14.557270000 | 25.425900000 |
| H | 8.326020000  | 15.727830000 | 25.570310000 |
| H | 4.658910000  | 14.452860000 | 20.465240000 |
| H | 4.555370000  | 16.228650000 | 20.251150000 |
| H | 3.970790000  | 15.465400000 | 21.777090000 |
| H | 17.146710000 | 11.845030000 | 12.424200000 |
| H | 15.929560000 | 15.991510000 | 12.955400000 |
| H | 15.382600000 | 15.510290000 | 15.340600000 |
| H | 17.151890000 | 10.894810000 | 15.866760000 |
| H | 17.060890000 | 10.287820000 | 14.165010000 |

|   |              |              |              |
|---|--------------|--------------|--------------|
| H | 15.567670000 | 10.504500000 | 15.156960000 |
| H | 17.995550000 | 14.630830000 | 10.983760000 |
| H | 16.278770000 | 14.992780000 | 10.624120000 |
| H | 16.905180000 | 13.311810000 | 10.446480000 |
| H | 7.891230000  | 9.867330000  | 18.706970000 |
| H | 7.814330000  | 13.240130000 | 21.459560000 |
| H | 10.241090000 | 13.635790000 | 21.017100000 |
| H | 11.076170000 | 10.539180000 | 17.255380000 |
| H | 9.820620000  | 9.263900000  | 17.531040000 |
| H | 11.292640000 | 9.363880000  | 18.573980000 |
| H | 5.612650000  | 11.264980000 | 19.441690000 |
| H | 5.784750000  | 12.039100000 | 21.059960000 |
| H | 6.043710000  | 10.269570000 | 20.866790000 |
| H | 12.785470000 | 23.283460000 | 27.324970000 |
| H | 15.799120000 | 23.161750000 | 24.182620000 |
| H | 15.126330000 | 20.824420000 | 23.650360000 |
| H | 11.010330000 | 20.361630000 | 26.391980000 |
| H | 11.365530000 | 21.495850000 | 27.754140000 |
| H | 12.212930000 | 19.902250000 | 27.625290000 |
| H | 13.932210000 | 25.408800000 | 26.560370000 |
| H | 15.251310000 | 25.326360000 | 25.334250000 |
| H | 15.541950000 | 24.765070000 | 27.014090000 |
| H | 12.250700000 | 25.940680000 | 20.284060000 |
| H | 12.249280000 | 23.294210000 | 23.739520000 |
| H | 12.485390000 | 21.327840000 | 22.221790000 |
| H | 13.503470000 | 23.731870000 | 17.943940000 |
| H | 12.374700000 | 25.134280000 | 18.102420000 |

|   |              |              |              |
|---|--------------|--------------|--------------|
| H | 11.744630000 | 23.465570000 | 17.795560000 |
| H | 12.315670000 | 26.905250000 | 22.546260000 |
| H | 12.592370000 | 25.839930000 | 23.975010000 |
| H | 10.936040000 | 26.053870000 | 23.323110000 |
| H | 15.547060000 | 18.899840000 | 11.286090000 |
| H | 18.670970000 | 18.203000000 | 14.234540000 |
| H | 16.957360000 | 18.265120000 | 16.048120000 |
| H | 12.780990000 | 18.269220000 | 13.346750000 |
| H | 13.308680000 | 19.204570000 | 11.890980000 |
| H | 13.056800000 | 20.022590000 | 13.486750000 |
| H | 18.254340000 | 17.417320000 | 11.060870000 |
| H | 19.280540000 | 18.641380000 | 11.879040000 |
| H | 18.036380000 | 19.154630000 | 10.678290000 |
| H | 8.339480000  | 24.117780000 | 23.597190000 |
| H | 8.620130000  | 23.690640000 | 19.278530000 |
| H | 9.151990000  | 21.263650000 | 19.566290000 |
| H | 8.219230000  | 20.715000000 | 24.446400000 |
| H | 8.721130000  | 22.346700000 | 25.052410000 |
| H | 9.949200000  | 21.153910000 | 24.472460000 |
| H | 7.855930000  | 26.025840000 | 22.230860000 |
| H | 7.339310000  | 25.744400000 | 20.529660000 |
| H | 9.056180000  | 26.102430000 | 20.892290000 |
| H | 16.416720000 | 12.229950000 | 29.005300000 |
| H | 17.131050000 | 10.869650000 | 24.936450000 |
| H | 15.660990000 | 12.705530000 | 24.078140000 |
| H | 15.159420000 | 15.340540000 | 28.332340000 |
| H | 14.973340000 | 13.972270000 | 29.494690000 |



|   |              |              |              |
|---|--------------|--------------|--------------|
| H | 13.662320000 | 14.362570000 | 28.308380000 |
| H | 18.406510000 | 10.642520000 | 28.398080000 |
| H | 18.420080000 | 9.905890000  | 26.752120000 |
| H | 17.155950000 | 9.443710000  | 27.945710000 |
| H | 5.968080000  | 16.674650000 | 16.372390000 |
| H | 8.417340000  | 13.449520000 | 17.968310000 |
| H | 10.307430000 | 15.041320000 | 18.261670000 |
| H | 7.952320000  | 19.362230000 | 17.420720000 |
| H | 6.766380000  | 18.852530000 | 16.154730000 |
| H | 8.528200000  | 18.991040000 | 15.772180000 |
| H | 5.348870000  | 13.841110000 | 17.951230000 |
| H | 6.248920000  | 12.985590000 | 16.656020000 |
| H | 5.152020000  | 14.357230000 | 16.241970000 |
| H | 18.933420000 | 8.138520000  | 22.909470000 |
| H | 19.954420000 | 12.240520000 | 23.945510000 |
| H | 18.056590000 | 13.051550000 | 22.544370000 |
| H | 15.747210000 | 8.752490000  | 21.564480000 |
| H | 17.150170000 | 7.614000000  | 21.525750000 |
| H | 16.870250000 | 8.793610000  | 20.181810000 |
| H | 20.964740000 | 10.270200000 | 25.210600000 |
| H | 21.702290000 | 9.589410000  | 23.723630000 |
| H | 20.587640000 | 8.579790000  | 24.701320000 |
| H | 22.553110000 | 13.731080000 | 25.468740000 |
| H | 18.470410000 | 13.803160000 | 26.976480000 |
| H | 17.766050000 | 15.116580000 | 24.974260000 |
| H | 21.836670000 | 14.731470000 | 22.183230000 |
| H | 23.142890000 | 14.694090000 | 23.436360000 |

|   |              |              |              |
|---|--------------|--------------|--------------|
| H | 22.263470000 | 16.233920000 | 23.057750000 |
| H | 21.667070000 | 12.049720000 | 27.333170000 |
| H | 20.144030000 | 12.523210000 | 28.170240000 |
| H | 21.609580000 | 13.554100000 | 28.301530000 |
| H | 21.967230000 | 17.451130000 | 14.218280000 |
| H | 18.800190000 | 14.468590000 | 14.285900000 |
| H | 18.128480000 | 15.245220000 | 16.565630000 |
| H | 20.972710000 | 19.234800000 | 17.196050000 |
| H | 22.291940000 | 18.958820000 | 15.980510000 |
| H | 22.241800000 | 18.026180000 | 17.525450000 |
| H | 21.161680000 | 16.251180000 | 12.053820000 |
| H | 20.079230000 | 14.819760000 | 12.233410000 |
| H | 21.776730000 | 14.743780000 | 12.811020000 |
| H | 7.904100000  | 15.482140000 | 12.972820000 |
| H | 8.309440000  | 11.545790000 | 14.773970000 |
| H | 10.594110000 | 12.166980000 | 15.568720000 |
| H | 10.634550000 | 17.050250000 | 14.530420000 |
| H | 9.560560000  | 17.080530000 | 13.078370000 |
| H | 11.231820000 | 16.407390000 | 12.966640000 |
| H | 5.866640000  | 13.959080000 | 13.306880000 |
| H | 6.122860000  | 12.266070000 | 13.867360000 |
| H | 6.623630000  | 12.754080000 | 12.216370000 |
| H | 22.219770000 | 12.173520000 | 15.243740000 |
| H | 23.300530000 | 15.629880000 | 17.643960000 |
| H | 21.461820000 | 15.047330000 | 19.266810000 |
| H | 20.069620000 | 10.592200000 | 17.614360000 |
| H | 20.495840000 | 10.716110000 | 15.855410000 |

|   |              |              |              |
|---|--------------|--------------|--------------|
| H | 19.095090000 | 11.633560000 | 16.539990000 |
| H | 24.143090000 | 13.520280000 | 14.580640000 |
| H | 24.908130000 | 14.592700000 | 15.809590000 |
| H | 23.619180000 | 15.233840000 | 14.739470000 |
| H | 16.791210000 | 22.389450000 | 28.398430000 |
| H | 14.083660000 | 19.121420000 | 29.349460000 |
| H | 15.144150000 | 17.739610000 | 27.563720000 |
| H | 19.109010000 | 20.546280000 | 26.464380000 |
| H | 18.446520000 | 22.202330000 | 26.782570000 |
| H | 17.914420000 | 21.254920000 | 25.337550000 |
| H | 14.939070000 | 21.379890000 | 31.081140000 |
| H | 13.575400000 | 21.679530000 | 29.956960000 |
| H | 14.994430000 | 22.789840000 | 29.963530000 |
| H | 14.058280000 | 9.059890000  | 27.041640000 |
| H | 11.460330000 | 12.364230000 | 28.147410000 |
| H | 11.138540000 | 12.904010000 | 25.730420000 |
| H | 13.217080000 | 8.852980000  | 23.651190000 |
| H | 14.533230000 | 8.528370000  | 24.851490000 |
| H | 14.636330000 | 9.940100000  | 23.733010000 |
| H | 13.389390000 | 9.325160000  | 29.382320000 |
| H | 12.138450000 | 10.536300000 | 29.851070000 |
| H | 13.846280000 | 11.042690000 | 29.641670000 |
| C | 19.340560000 | 21.247080000 | 21.512230000 |
| H | 19.575890000 | 21.936400000 | 22.357670000 |
| H | 19.330620000 | 21.875330000 | 20.586110000 |
| C | 20.468870000 | 20.240670000 | 21.372360000 |
| C | 20.310690000 | 18.881710000 | 21.046700000 |

|   |              |              |              |
|---|--------------|--------------|--------------|
| C | 21.796750000 | 20.703790000 | 21.504950000 |
| C | 21.440690000 | 18.073610000 | 20.813340000 |
| N | 22.895660000 | 19.943900000 | 21.271920000 |
| C | 22.735980000 | 18.616870000 | 20.903650000 |
| H | 22.000410000 | 21.751340000 | 21.801400000 |
| H | 21.292000000 | 17.013300000 | 20.540840000 |
| C | 23.999600000 | 17.904390000 | 20.607760000 |
| N | 25.118570000 | 18.701860000 | 20.698710000 |
| C | 26.341720000 | 18.169810000 | 20.460120000 |
| H | 27.198800000 | 18.858010000 | 20.568140000 |
| C | 26.580680000 | 16.819760000 | 20.162860000 |
| C | 25.433870000 | 15.993200000 | 20.034870000 |
| H | 25.544100000 | 14.919340000 | 19.783030000 |
| C | 24.155260000 | 16.540240000 | 20.255640000 |
| H | 23.265360000 | 15.887190000 | 20.181120000 |
| H | 25.441520000 | 17.821560000 | 25.690290000 |
| C | 25.261950000 | 18.837580000 | 25.294890000 |
| C | 25.157630000 | 19.957560000 | 26.150180000 |
| C | 25.148930000 | 19.031110000 | 23.913840000 |
| C | 24.938310000 | 21.216350000 | 25.581870000 |
| N | 24.944350000 | 20.255370000 | 23.344410000 |
| C | 24.825900000 | 21.356190000 | 24.178580000 |
| H | 25.250670000 | 19.847930000 | 27.247370000 |
| H | 25.236610000 | 18.178940000 | 23.213600000 |
| H | 24.855360000 | 22.106660000 | 26.230990000 |
| C | 24.572690000 | 22.626100000 | 23.497440000 |
| N | 24.490370000 | 22.544150000 | 22.113850000 |

|   |              |              |              |
|---|--------------|--------------|--------------|
| C | 24.224440000 | 23.689600000 | 21.419960000 |
| H | 24.164120000 | 23.583540000 | 20.320630000 |
| C | 24.035830000 | 24.933630000 | 22.032140000 |
| C | 24.126730000 | 25.024220000 | 23.440270000 |
| H | 23.991110000 | 25.991400000 | 23.960320000 |
| C | 24.395020000 | 23.860510000 | 24.166550000 |
| H | 24.477380000 | 23.902320000 | 25.267440000 |
| C | 29.222820000 | 21.135860000 | 21.764280000 |
| C | 29.605210000 | 21.629730000 | 20.496060000 |
| C | 27.864470000 | 20.914140000 | 22.017390000 |
| C | 28.609910000 | 21.869750000 | 19.539720000 |
| N | 26.886870000 | 21.133270000 | 21.091770000 |
| C | 27.251370000 | 21.610340000 | 19.841550000 |
| H | 30.673250000 | 21.799200000 | 20.256290000 |
| H | 27.523650000 | 20.517110000 | 22.992190000 |
| H | 28.888870000 | 22.239870000 | 18.535620000 |
| C | 26.153710000 | 21.741330000 | 18.872210000 |
| N | 24.913650000 | 21.297760000 | 19.311010000 |
| C | 23.863470000 | 21.331410000 | 18.442610000 |
| H | 22.901170000 | 20.953070000 | 18.836970000 |
| C | 23.964880000 | 21.825260000 | 17.136610000 |
| C | 25.215560000 | 22.308830000 | 16.690060000 |
| H | 25.336900000 | 22.718890000 | 15.669680000 |
| C | 26.308580000 | 22.258550000 | 17.563770000 |
| H | 27.296710000 | 22.624750000 | 17.231410000 |
| H | 23.827520000 | 25.822350000 | 21.409100000 |
| H | 29.967640000 | 20.907430000 | 22.547970000 |

|    |              |              |              |
|----|--------------|--------------|--------------|
| H  | 23.070830000 | 21.830420000 | 16.485500000 |
| Ru | 24.859510000 | 20.660190000 | 21.306290000 |
| C  | 28.020990000 | 16.377920000 | 20.241880000 |
| H  | 28.659430000 | 17.270610000 | 20.418240000 |
| H  | 28.103510000 | 15.753130000 | 21.169690000 |
| H  | 19.286600000 | 18.464750000 | 20.972980000 |
| Ag | 33.440820000 | 13.464050000 | 18.988010000 |
| Ag | 31.333590000 | 15.226380000 | 19.545430000 |
| Ag | 33.237630000 | 15.818790000 | 17.423360000 |
| Ag | 32.830740000 | 13.798380000 | 21.716690000 |
| Ag | 34.212330000 | 15.918980000 | 20.095950000 |
| Ag | 33.641530000 | 11.235510000 | 20.707590000 |
| Ag | 35.527080000 | 11.669860000 | 18.335140000 |
| Ag | 34.082710000 | 13.067050000 | 16.274970000 |
| Ag | 35.938710000 | 14.544560000 | 18.154060000 |
| Ag | 31.020950000 | 12.283580000 | 19.992800000 |
| Ag | 32.562080000 | 11.070730000 | 17.825930000 |
| Ag | 35.679780000 | 13.309750000 | 20.747760000 |
| Ag | 31.368000000 | 13.596740000 | 17.033820000 |
| Ag | 37.125990000 | 16.244390000 | 20.528910000 |
| Ag | 29.988260000 | 14.550340000 | 22.034200000 |
| Ag | 36.938150000 | 12.658650000 | 15.568740000 |
| Ag | 31.299460000 | 9.247770000  | 19.863510000 |
| Ag | 30.010360000 | 16.315750000 | 17.090290000 |
| Ag | 32.522240000 | 16.659750000 | 22.376970000 |
| Ag | 34.999890000 | 9.934540000  | 16.026460000 |
| Ag | 29.453400000 | 11.288630000 | 17.664360000 |

|    |              |              |              |
|----|--------------|--------------|--------------|
| Ag | 36.420510000 | 10.220430000 | 20.977160000 |
| Ag | 34.975780000 | 12.300520000 | 23.417270000 |
| Ag | 32.421400000 | 15.379600000 | 14.637990000 |
| Ag | 36.123650000 | 17.425390000 | 17.536210000 |
| S  | 36.292270000 | 10.255780000 | 23.413760000 |
| S  | 28.745600000 | 15.323360000 | 18.924190000 |
| S  | 33.322420000 | 8.789530000  | 21.153970000 |
| S  | 37.507770000 | 14.948040000 | 16.215710000 |
| S  | 34.277150000 | 17.609220000 | 15.953900000 |
| S  | 28.736970000 | 12.671710000 | 21.030840000 |
| S  | 33.521990000 | 14.129930000 | 24.138730000 |
| S  | 37.377860000 | 14.441840000 | 22.209680000 |
| S  | 30.171100000 | 16.840730000 | 22.997000000 |
| S  | 28.972320000 | 13.249960000 | 16.310660000 |
| S  | 34.844220000 | 17.415940000 | 22.080960000 |
| S  | 34.345780000 | 14.022980000 | 13.974070000 |
| S  | 33.093530000 | 8.758140000  | 16.999900000 |
| S  | 36.825300000 | 9.537860000  | 18.662080000 |
| S  | 38.099680000 | 17.811780000 | 18.903960000 |
| S  | 36.668150000 | 10.556200000 | 14.371130000 |
| S  | 29.272200000 | 9.033500000  | 18.533170000 |
| S  | 30.651380000 | 17.076620000 | 14.867310000 |
| C  | 37.910960000 | 10.721540000 | 24.027970000 |
| C  | 39.039290000 | 9.883750000  | 23.779300000 |
| C  | 40.277240000 | 10.240770000 | 24.353750000 |
| C  | 40.447580000 | 11.385400000 | 25.160580000 |
| C  | 39.313200000 | 12.190640000 | 25.406440000 |

|   |              |              |              |
|---|--------------|--------------|--------------|
| C | 38.067070000 | 11.863260000 | 24.849930000 |
| C | 38.942890000 | 8.663040000  | 22.898480000 |
| C | 41.809740000 | 11.764770000 | 25.694110000 |
| C | 32.726060000 | 8.544530000  | 22.827240000 |
| C | 32.349350000 | 7.226590000  | 23.225500000 |
| C | 31.933780000 | 7.027240000  | 24.559780000 |
| C | 31.892700000 | 8.066570000  | 25.515440000 |
| C | 32.277750000 | 9.360900000  | 25.099860000 |
| C | 32.678270000 | 9.593020000  | 23.774360000 |
| C | 32.393460000 | 6.068250000  | 22.256800000 |
| C | 31.463170000 | 7.797230000  | 26.941430000 |
| C | 39.216160000 | 14.868730000 | 16.749280000 |
| C | 40.247820000 | 14.976950000 | 15.766950000 |
| C | 41.587460000 | 14.977210000 | 16.208140000 |
| C | 41.947150000 | 14.894430000 | 17.572650000 |
| C | 40.908660000 | 14.798440000 | 18.523880000 |
| C | 39.564570000 | 14.775850000 | 18.114380000 |
| C | 39.927730000 | 15.115430000 | 14.297800000 |
| C | 43.401110000 | 14.893340000 | 17.992680000 |
| C | 33.519650000 | 19.187350000 | 16.330730000 |
| C | 34.064890000 | 20.373480000 | 15.750230000 |
| C | 33.422590000 | 21.602700000 | 16.011340000 |
| C | 32.254660000 | 21.705750000 | 16.799490000 |
| C | 31.723770000 | 20.515840000 | 17.344270000 |
| C | 32.352290000 | 19.280240000 | 17.122040000 |
| C | 35.281110000 | 20.317090000 | 14.859080000 |
| C | 31.593140000 | 23.048160000 | 17.027390000 |



|   |              |              |              |
|---|--------------|--------------|--------------|
| C | 28.382860000 | 11.521170000 | 22.355490000 |
| C | 27.118540000 | 11.595960000 | 23.016990000 |
| C | 26.838950000 | 10.659340000 | 24.034760000 |
| C | 27.745340000 | 9.641200000  | 24.405550000 |
| C | 28.979970000 | 9.575840000  | 23.724610000 |
| C | 29.295300000 | 10.506590000 | 22.722500000 |
| C | 26.076640000 | 12.618550000 | 22.624110000 |
| C | 27.392320000 | 8.620880000  | 25.464980000 |
| C | 32.366160000 | 13.293770000 | 25.226690000 |
| C | 32.743920000 | 13.029510000 | 26.577620000 |
| C | 31.776120000 | 12.475940000 | 27.445930000 |
| C | 30.458360000 | 12.174060000 | 27.036440000 |
| C | 30.117390000 | 12.412320000 | 25.686930000 |
| C | 31.062190000 | 12.952370000 | 24.801310000 |
| C | 34.145670000 | 13.297740000 | 27.069180000 |
| C | 29.439150000 | 11.623640000 | 28.009590000 |
| C | 38.995300000 | 13.749840000 | 21.869820000 |
| C | 40.149110000 | 14.380100000 | 22.426390000 |
| C | 41.409540000 | 13.778200000 | 22.217650000 |
| C | 41.577620000 | 12.577850000 | 21.494150000 |
| C | 40.422500000 | 11.971630000 | 20.953530000 |
| C | 39.158400000 | 12.553180000 | 21.134050000 |
| C | 40.041610000 | 15.662260000 | 23.214000000 |
| C | 42.948600000 | 11.981540000 | 21.260810000 |
| C | 30.126790000 | 16.525720000 | 24.759620000 |
| C | 28.927190000 | 16.049040000 | 25.366050000 |
| C | 28.919070000 | 15.835960000 | 26.760110000 |

|   |             |             |             |
|---|-------------|-------------|-------------|
| C | 30.04660000 | 16.06766000 | 27.57602000 |
| C | 31.21650000 | 16.55960000 | 26.95499000 |
| C | 31.25462000 | 16.78947000 | 25.57161000 |
| C | 27.70837000 | 15.71231000 | 24.54332000 |
| C | 30.02143000 | 15.73928000 | 29.05163000 |
| C | 28.90746000 | 12.58546000 | 14.64760000 |
| C | 27.73375000 | 11.89930000 | 14.21078000 |
| C | 27.65760000 | 11.50666000 | 12.85684000 |
| C | 28.69484000 | 11.75140000 | 11.92865000 |
| C | 29.86291000 | 12.39319000 | 12.39458000 |
| C | 29.96167000 | 12.80400000 | 13.73278000 |
| C | 26.62202000 | 11.54688000 | 15.16921000 |
| C | 28.55522000 | 11.35253000 | 10.47694000 |
| C | 34.60798000 | 19.11756000 | 21.56434000 |
| C | 34.71971000 | 20.15444000 | 22.53718000 |
| C | 34.60890000 | 21.49350000 | 22.10222000 |
| C | 34.39969000 | 21.84472000 | 20.75184000 |
| C | 34.29170000 | 20.79929000 | 19.80745000 |
| C | 34.39238000 | 19.45951000 | 20.20976000 |
| C | 34.96246000 | 19.84426000 | 23.99541000 |
| C | 34.30405000 | 23.29112000 | 20.31785000 |
| C | 33.75809000 | 12.80271000 | 12.80155000 |
| C | 33.78201000 | 13.11725000 | 11.41150000 |
| C | 33.40363000 | 12.11080000 | 10.49416000 |
| C | 33.01275000 | 10.81532000 | 10.89551000 |
| C | 32.99629000 | 10.52924000 | 12.27947000 |
| C | 33.35887000 | 11.51014000 | 13.21276000 |

|   |              |              |              |
|---|--------------|--------------|--------------|
| C | 34.217710000 | 14.477420000 | 10.920160000 |
| C | 32.634640000 | 9.754470000  | 9.884720000  |
| C | 32.138810000 | 8.428690000  | 15.515860000 |
| C | 32.508320000 | 7.337580000  | 14.671340000 |
| C | 31.689090000 | 7.044500000  | 13.560000000 |
| C | 30.531740000 | 7.790990000  | 13.240410000 |
| C | 30.201340000 | 8.880960000  | 14.074130000 |
| C | 30.995490000 | 9.191080000  | 15.189860000 |
| C | 33.762120000 | 6.535690000  | 14.922870000 |
| C | 29.667700000 | 7.429190000  | 12.051790000 |
| C | 38.557590000 | 9.871090000  | 18.335260000 |
| C | 39.498430000 | 8.807560000  | 18.497710000 |
| C | 40.845390000 | 9.049570000  | 18.153080000 |
| C | 41.296500000 | 10.287480000 | 17.641090000 |
| C | 40.350700000 | 11.324190000 | 17.496750000 |
| C | 39.004540000 | 11.118090000 | 17.845380000 |
| C | 39.068400000 | 7.448260000  | 18.995710000 |
| C | 42.743540000 | 10.484500000 | 17.245300000 |
| C | 37.967420000 | 19.550750000 | 19.328300000 |
| C | 38.349430000 | 20.059930000 | 20.605650000 |
| C | 38.358900000 | 21.459090000 | 20.792620000 |
| C | 38.021310000 | 22.377390000 | 19.775110000 |
| C | 37.642990000 | 21.851900000 | 18.520400000 |
| C | 37.617330000 | 20.465480000 | 18.305580000 |
| C | 38.750400000 | 19.149970000 | 21.740950000 |
| C | 38.096720000 | 23.868950000 | 20.017940000 |
| C | 38.069900000 | 9.475230000  | 14.645360000 |

|   |              |              |              |
|---|--------------|--------------|--------------|
| C | 39.370130000 | 9.859780000  | 14.203490000 |
| C | 40.414260000 | 8.912460000  | 14.287230000 |
| C | 40.229060000 | 7.607410000  | 14.787700000 |
| C | 38.932510000 | 7.250420000  | 15.224020000 |
| C | 37.873960000 | 8.169020000  | 15.156720000 |
| C | 39.646480000 | 11.243200000 | 13.671240000 |
| C | 41.381780000 | 6.632360000  | 14.881180000 |
| C | 27.813020000 | 9.078890000  | 19.568100000 |
| C | 27.616190000 | 8.084010000  | 20.571150000 |
| C | 26.402830000 | 8.092730000  | 21.289800000 |
| C | 25.372890000 | 9.026910000  | 21.048890000 |
| C | 25.583340000 | 9.992010000  | 20.039400000 |
| C | 26.787430000 | 10.022580000 | 19.318250000 |
| C | 28.672990000 | 7.053630000  | 20.881060000 |
| C | 24.081980000 | 8.980400000  | 21.835800000 |
| C | 29.208020000 | 16.533240000 | 13.947630000 |
| C | 29.305520000 | 16.087150000 | 12.595810000 |
| C | 28.122520000 | 15.704950000 | 11.927430000 |
| C | 26.846300000 | 15.770510000 | 12.523970000 |
| C | 26.768200000 | 16.265200000 | 13.844460000 |
| C | 27.927760000 | 16.627320000 | 14.545600000 |
| C | 30.625170000 | 15.993240000 | 11.873650000 |
| C | 25.617140000 | 15.288050000 | 11.786780000 |
| H | 41.152630000 | 9.588590000  | 24.151230000 |
| H | 39.406030000 | 13.093980000 | 26.042220000 |
| H | 37.188380000 | 12.511740000 | 25.043650000 |
| H | 38.157850000 | 7.955280000  | 23.253270000 |

|   |              |              |              |
|---|--------------|--------------|--------------|
| H | 39.915230000 | 8.125020000  | 22.847240000 |
| H | 38.654260000 | 8.954360000  | 21.857060000 |
| H | 42.464070000 | 10.873510000 | 25.821950000 |
| H | 41.738400000 | 12.286940000 | 26.674320000 |
| H | 42.325720000 | 12.457780000 | 24.985810000 |
| H | 31.630130000 | 6.004520000  | 24.865860000 |
| H | 32.246340000 | 10.207780000 | 25.813700000 |
| H | 32.955130000 | 10.620400000 | 23.456780000 |
| H | 31.750940000 | 6.257580000  | 21.363990000 |
| H | 32.049930000 | 5.130450000  | 22.746350000 |
| H | 33.424550000 | 5.909670000  | 21.862870000 |
| H | 30.761440000 | 6.934520000  | 27.002100000 |
| H | 30.961700000 | 8.684600000  | 27.388960000 |
| H | 32.338370000 | 7.553050000  | 27.590050000 |
| H | 42.388400000 | 15.067160000 | 15.444840000 |
| H | 41.146540000 | 14.728900000 | 19.603510000 |
| H | 38.759860000 | 14.679850000 | 18.872660000 |
| H | 39.251310000 | 14.301580000 | 13.945990000 |
| H | 40.855100000 | 15.091510000 | 13.684670000 |
| H | 39.388870000 | 16.070180000 | 14.092660000 |
| H | 43.894380000 | 13.918870000 | 17.759150000 |
| H | 43.506980000 | 15.065640000 | 19.086190000 |
| H | 43.982410000 | 15.681040000 | 17.460380000 |
| H | 33.853880000 | 22.523740000 | 15.566070000 |
| H | 30.804940000 | 20.545160000 | 17.963240000 |
| H | 31.934460000 | 18.352440000 | 17.564560000 |
| H | 36.134720000 | 19.809030000 | 15.366720000 |

|   |              |              |              |
|---|--------------|--------------|--------------|
| H | 35.603790000 | 21.333760000 | 14.544950000 |
| H | 35.073800000 | 19.711990000 | 13.945650000 |
| H | 32.330460000 | 23.879920000 | 16.971170000 |
| H | 31.106070000 | 23.104170000 | 18.028630000 |
| H | 30.807250000 | 23.255480000 | 16.260640000 |
| H | 25.858020000 | 10.723490000 | 24.550570000 |
| H | 29.718120000 | 8.794880000  | 23.990280000 |
| H | 30.278780000 | 10.453060000 | 22.209750000 |
| H | 26.474570000 | 13.659500000 | 22.672420000 |
| H | 25.184140000 | 12.548200000 | 23.286890000 |
| H | 25.745760000 | 12.454660000 | 21.571070000 |
| H | 26.730130000 | 9.050010000  | 26.250440000 |
| H | 28.304450000 | 8.219140000  | 25.960500000 |
| H | 26.852400000 | 7.751460000  | 25.018120000 |
| H | 32.074760000 | 12.263200000 | 28.493890000 |
| H | 29.105850000 | 12.157200000 | 25.313360000 |
| H | 30.788480000 | 13.102190000 | 23.732720000 |
| H | 34.883990000 | 12.675550000 | 26.506800000 |
| H | 34.244340000 | 13.059340000 | 28.151000000 |
| H | 34.444240000 | 14.358520000 | 26.903830000 |
| H | 29.928390000 | 11.146380000 | 28.888030000 |
| H | 28.778530000 | 10.869700000 | 27.523530000 |
| H | 28.774950000 | 12.433240000 | 28.399150000 |
| H | 42.302760000 | 14.280390000 | 22.643940000 |
| H | 40.509740000 | 11.037370000 | 20.366200000 |
| H | 38.264180000 | 12.065850000 | 20.689740000 |
| H | 39.566920000 | 16.463340000 | 22.599260000 |

|   |              |              |              |
|---|--------------|--------------|--------------|
| H | 41.043910000 | 16.014220000 | 23.546460000 |
| H | 39.390270000 | 15.535880000 | 24.110600000 |
| H | 43.333280000 | 12.250100000 | 20.247490000 |
| H | 42.924220000 | 10.869030000 | 21.312970000 |
| H | 43.691220000 | 12.347600000 | 22.005110000 |
| H | 27.988780000 | 15.451610000 | 27.228870000 |
| H | 32.120790000 | 16.757730000 | 27.563900000 |
| H | 32.184980000 | 17.156790000 | 25.093670000 |
| H | 27.355490000 | 16.585250000 | 23.943590000 |
| H | 26.875440000 | 15.346900000 | 25.185020000 |
| H | 27.950430000 | 14.909520000 | 23.801870000 |
| H | 28.983670000 | 15.733250000 | 29.454750000 |
| H | 30.622590000 | 16.463180000 | 29.647290000 |
| H | 30.456880000 | 14.727240000 | 29.233620000 |
| H | 26.747970000 | 10.968050000 | 12.516590000 |
| H | 30.714660000 | 12.566610000 | 11.706720000 |
| H | 30.883250000 | 13.308780000 | 14.091800000 |
| H | 26.986090000 | 10.822470000 | 15.938330000 |
| H | 25.763730000 | 11.080730000 | 14.635270000 |
| H | 26.261920000 | 12.438420000 | 15.730950000 |
| H | 27.865550000 | 10.487680000 | 10.351920000 |
| H | 29.540130000 | 11.081250000 | 10.035260000 |
| H | 28.139860000 | 12.188990000 | 9.864140000  |
| H | 34.717720000 | 22.299490000 | 22.857100000 |
| H | 34.145990000 | 21.033380000 | 18.735400000 |
| H | 34.326490000 | 18.651640000 | 19.451130000 |
| H | 34.126490000 | 19.244790000 | 24.429610000 |

|   |              |              |              |
|---|--------------|--------------|--------------|
| H | 35.068170000 | 20.778850000 | 24.589540000 |
| H | 35.883170000 | 19.231020000 | 24.133010000 |
| H | 33.247810000 | 23.598070000 | 20.121480000 |
| H | 34.869960000 | 23.463090000 | 19.373740000 |
| H | 34.710650000 | 23.978640000 | 21.092660000 |
| H | 33.429860000 | 12.355660000 | 9.411820000  |
| H | 32.685650000 | 9.529490000  | 12.640210000 |
| H | 33.336180000 | 11.270260000 | 14.296600000 |
| H | 33.575910000 | 15.288780000 | 11.337960000 |
| H | 34.173950000 | 14.534580000 | 9.810610000  |
| H | 35.257270000 | 14.711990000 | 11.248790000 |
| H | 31.641650000 | 9.307220000  | 10.123880000 |
| H | 33.369960000 | 8.915580000  | 9.885480000  |
| H | 32.591940000 | 10.167500000 | 8.852740000  |
| H | 31.980390000 | 6.192780000  | 12.909960000 |
| H | 29.323080000 | 9.515410000  | 13.841590000 |
| H | 30.731050000 | 10.060200000 | 15.828700000 |
| H | 34.667600000 | 7.178310000  | 14.795290000 |
| H | 33.841420000 | 5.685940000  | 14.209540000 |
| H | 33.802830000 | 6.140200000  | 15.963370000 |
| H | 30.277540000 | 7.190740000  | 11.150270000 |
| H | 28.976310000 | 8.262360000  | 11.793400000 |
| H | 29.042960000 | 6.529090000  | 12.263590000 |
| H | 41.574100000 | 8.222510000  | 18.285830000 |
| H | 40.667630000 | 12.317860000 | 17.125680000 |
| H | 38.278750000 | 11.952760000 | 17.745680000 |
| H | 38.512760000 | 7.519170000  | 19.959720000 |



|   |              |              |              |
|---|--------------|--------------|--------------|
| H | 39.946070000 | 6.779950000  | 19.139390000 |
| H | 38.372040000 | 6.961610000  | 18.272740000 |
| H | 43.442440000 | 10.176840000 | 18.058130000 |
| H | 42.948700000 | 11.548870000 | 16.996230000 |
| H | 43.002270000 | 9.872610000  | 16.347990000 |
| H | 38.655000000 | 21.850530000 | 21.787730000 |
| H | 37.367300000 | 22.537110000 | 17.693260000 |
| H | 37.332390000 | 20.065170000 | 17.313010000 |
| H | 37.929920000 | 18.435180000 | 21.997470000 |
| H | 39.000620000 | 19.736160000 | 22.652770000 |
| H | 39.637330000 | 18.531520000 | 21.465510000 |
| H | 37.726880000 | 24.140140000 | 21.033220000 |
| H | 37.496200000 | 24.435550000 | 19.271730000 |
| H | 39.147020000 | 24.240130000 | 19.945400000 |
| H | 41.422440000 | 9.216760000  | 13.935270000 |
| H | 38.743570000 | 6.233460000  | 15.622450000 |
| H | 36.865150000 | 7.874180000  | 15.510400000 |
| H | 38.981280000 | 11.496840000 | 12.813150000 |
| H | 40.705330000 | 11.345620000 | 13.345670000 |
| H | 39.450020000 | 12.012680000 | 14.458730000 |
| H | 42.244590000 | 6.961020000  | 14.259740000 |
| H | 41.083230000 | 5.613750000  | 14.543050000 |
| H | 41.745220000 | 6.534100000  | 15.932380000 |
| H | 26.256950000 | 7.325080000  | 22.077170000 |
| H | 24.790860000 | 10.733300000 | 19.810080000 |
| H | 26.944680000 | 10.797880000 | 18.540930000 |
| H | 28.954460000 | 6.468230000  | 19.974770000 |

|   |              |              |              |
|---|--------------|--------------|--------------|
| H | 28.326780000 | 6.349240000  | 21.668950000 |
| H | 29.610230000 | 7.544650000  | 21.244970000 |
| H | 23.317550000 | 8.344240000  | 21.328810000 |
| H | 23.637930000 | 9.995330000  | 21.949090000 |
| H | 24.243750000 | 8.555220000  | 22.852230000 |
| H | 28.212430000 | 15.333200000 | 10.885340000 |
| H | 25.781650000 | 16.359100000 | 14.338870000 |
| H | 27.849180000 | 16.992670000 | 15.589830000 |
| H | 31.149870000 | 16.975860000 | 11.833650000 |
| H | 30.483380000 | 15.619320000 | 10.836450000 |
| H | 31.319230000 | 15.287320000 | 12.397460000 |
| H | 25.708180000 | 15.446330000 | 10.688640000 |
| H | 24.696400000 | 15.809200000 | 12.135270000 |
| H | 25.462140000 | 14.193410000 | 11.948770000 |

#### D Isomer

|    |              |              |              |
|----|--------------|--------------|--------------|
| Ag | 14.407380000 | 15.970970000 | 19.030500000 |
| Ag | 11.693810000 | 15.358070000 | 19.582460000 |
| Ag | 13.483790000 | 13.356370000 | 18.467930000 |
| Ag | 12.486160000 | 18.032890000 | 18.740560000 |
| Ag | 12.633720000 | 15.648640000 | 16.867610000 |
| Ag | 15.325740000 | 18.565510000 | 19.542130000 |
| Ag | 17.108360000 | 16.487700000 | 18.313830000 |
| Ag | 16.329810000 | 13.957340000 | 19.426000000 |
| Ag | 15.418370000 | 14.843840000 | 16.639290000 |
| Ag | 13.382460000 | 17.240280000 | 21.340560000 |
| Ag | 16.104930000 | 16.239950000 | 21.261890000 |

|    |              |              |              |
|----|--------------|--------------|--------------|
| Ag | 14.885380000 | 17.686920000 | 16.815100000 |
| Ag | 14.019870000 | 14.188400000 | 21.193930000 |
| Ag | 13.695160000 | 16.021000000 | 14.162080000 |
| Ag | 10.071420000 | 17.455990000 | 20.898190000 |
| Ag | 18.454530000 | 13.719590000 | 17.329820000 |
| Ag | 15.662740000 | 18.963960000 | 22.685400000 |
| Ag | 11.575890000 | 12.490690000 | 20.851010000 |
| Ag | 9.962220000  | 17.126970000 | 17.437410000 |
| Ag | 19.155500000 | 15.358920000 | 20.205390000 |
| Ag | 14.330990000 | 15.878880000 | 23.760670000 |
| Ag | 17.207830000 | 19.639380000 | 17.576870000 |
| Ag | 13.858560000 | 20.394460000 | 17.462050000 |
| Ag | 14.806940000 | 11.287050000 | 20.230870000 |
| Ag | 13.822230000 | 12.701810000 | 15.355560000 |
| S  | 15.912130000 | 21.693200000 | 17.296530000 |
| S  | 9.856170000  | 14.217250000 | 20.884290000 |
| S  | 15.971920000 | 20.623830000 | 20.941180000 |
| S  | 16.888090000 | 13.113510000 | 15.556010000 |
| S  | 13.549080000 | 11.173620000 | 17.224490000 |
| S  | 11.447950000 | 17.587360000 | 22.912490000 |
| S  | 11.462490000 | 19.911130000 | 17.382180000 |
| S  | 14.207270000 | 18.403080000 | 14.504700000 |
| S  | 8.309060000  | 17.400810000 | 19.207160000 |
| S  | 13.301180000 | 13.682030000 | 23.552820000 |
| S  | 10.871310000 | 16.474240000 | 15.250190000 |
| S  | 17.079540000 | 11.566690000 | 19.364790000 |
| S  | 18.424920000 | 16.632620000 | 22.157580000 |

|   |              |              |              |
|---|--------------|--------------|--------------|
| S | 19.050110000 | 18.072230000 | 17.986280000 |
| S | 13.899520000 | 13.794790000 | 13.186980000 |
| S | 20.401260000 | 13.814810000 | 18.797780000 |
| S | 15.414790000 | 17.797190000 | 24.796730000 |
| S | 12.680300000 | 10.326510000 | 20.943060000 |
| C | 16.049290000 | 22.083500000 | 15.548400000 |
| C | 17.303160000 | 22.484510000 | 15.000730000 |
| C | 17.361820000 | 22.829100000 | 13.634840000 |
| C | 16.235900000 | 22.792080000 | 12.786020000 |
| C | 15.000980000 | 22.407200000 | 13.353130000 |
| C | 14.909320000 | 22.060910000 | 14.710420000 |
| C | 18.559710000 | 22.500330000 | 15.835940000 |
| C | 16.365160000 | 23.098220000 | 11.311850000 |
| C | 8.601430000  | 13.602150000 | 19.755200000 |
| C | 7.568660000  | 12.756540000 | 20.259930000 |
| C | 6.529500000  | 12.378820000 | 19.380260000 |
| C | 6.470460000  | 12.798660000 | 18.032860000 |
| C | 7.512780000  | 13.620900000 | 17.552680000 |
| C | 8.560820000  | 14.006580000 | 18.401920000 |
| C | 7.581940000  | 12.250170000 | 21.682690000 |
| C | 5.350470000  | 12.349430000 | 17.120150000 |
| C | 17.590780000 | 13.743690000 | 14.034540000 |
| C | 18.507020000 | 12.919800000 | 13.314520000 |
| C | 19.002060000 | 13.397430000 | 12.082530000 |
| C | 18.611070000 | 14.635990000 | 11.526400000 |
| C | 17.693790000 | 15.427190000 | 12.252980000 |
| C | 17.197710000 | 14.987690000 | 13.491230000 |

|   |              |              |              |
|---|--------------|--------------|--------------|
| C | 18.926640000 | 11.562980000 | 13.829310000 |
| C | 19.182000000 | 15.112040000 | 10.208390000 |
| C | 11.886910000 | 10.526550000 | 17.023520000 |
| C | 11.686810000 | 9.382970000  | 16.191330000 |
| C | 10.387550000 | 8.839210000  | 16.105330000 |
| C | 9.285500000  | 9.367190000  | 16.816680000 |
| C | 9.509410000  | 10.494480000 | 17.634100000 |
| C | 10.788380000 | 11.068780000 | 17.724590000 |
| C | 12.827430000 | 8.752520000  | 15.428550000 |
| C | 7.912190000  | 8.739050000  | 16.713170000 |
| C | 11.318040000 | 19.315790000 | 23.368660000 |
| C | 10.263110000 | 19.718780000 | 24.242870000 |
| C | 10.210470000 | 21.070950000 | 24.643970000 |
| C | 11.155300000 | 22.034090000 | 24.227160000 |
| C | 12.185790000 | 21.612880000 | 23.358420000 |
| C | 12.262850000 | 20.275540000 | 22.937230000 |
| C | 9.241030000  | 18.733380000 | 24.757890000 |
| C | 11.088680000 | 23.457150000 | 24.735570000 |
| C | 10.813740000 | 21.164590000 | 18.490270000 |
| C | 10.518020000 | 22.460150000 | 17.973740000 |
| C | 9.897220000  | 23.392510000 | 18.834200000 |
| C | 9.558680000  | 23.095240000 | 20.171370000 |
| C | 9.885960000  | 21.812930000 | 20.665700000 |
| C | 10.505220000 | 20.866680000 | 19.836940000 |
| C | 10.850830000 | 22.846210000 | 16.551290000 |
| C | 8.837280000  | 24.096870000 | 21.045820000 |
| C | 15.681350000 | 18.651130000 | 13.516110000 |

|   |              |              |              |
|---|--------------|--------------|--------------|
| C | 15.558140000 | 18.809690000 | 12.101510000 |
| C | 16.723110000 | 19.079960000 | 11.351310000 |
| C | 18.001370000 | 19.213410000 | 11.939680000 |
| C | 18.098910000 | 19.057850000 | 13.339100000 |
| C | 16.958430000 | 18.775650000 | 14.108160000 |
| C | 14.219940000 | 18.697460000 | 11.414790000 |
| C | 19.229000000 | 19.472220000 | 11.094550000 |
| C | 7.630440000  | 19.042390000 | 18.999700000 |
| C | 6.953320000  | 19.677590000 | 20.081010000 |
| C | 6.340140000  | 20.926890000 | 19.846780000 |
| C | 6.376440000  | 21.575090000 | 18.594950000 |
| C | 7.043720000  | 20.921130000 | 17.534610000 |
| C | 7.654790000  | 19.675110000 | 17.733250000 |
| C | 6.912280000  | 19.062830000 | 21.456650000 |
| C | 5.758090000  | 22.939710000 | 18.396020000 |
| C | 14.546470000 | 12.675680000 | 24.366580000 |
| C | 14.453990000 | 12.467910000 | 25.776960000 |
| C | 15.400760000 | 11.620870000 | 26.391290000 |
| C | 16.423360000 | 10.962350000 | 25.672040000 |
| C | 16.498180000 | 11.188130000 | 24.281460000 |
| C | 15.576940000 | 12.035330000 | 23.642880000 |
| C | 13.389590000 | 13.141900000 | 26.608900000 |
| C | 17.396710000 | 10.039050000 | 26.370500000 |
| C | 9.879490000  | 15.050880000 | 14.784540000 |
| C | 8.716110000  | 15.250300000 | 13.983220000 |
| C | 7.992150000  | 14.112650000 | 13.562930000 |
| C | 8.374650000  | 12.794940000 | 13.893510000 |

|   |              |              |              |
|---|--------------|--------------|--------------|
| C | 9.527460000  | 12.623560000 | 14.690360000 |
| C | 10.263370000 | 13.734020000 | 15.129900000 |
| C | 8.259050000  | 16.631330000 | 13.576680000 |
| C | 7.571930000  | 11.600310000 | 13.429570000 |
| C | 18.196250000 | 11.271210000 | 20.735080000 |
| C | 18.748910000 | 9.965880000  | 20.896170000 |
| C | 19.701260000 | 9.765630000  | 21.920160000 |
| C | 20.129600000 | 10.798510000 | 22.781870000 |
| C | 19.558210000 | 12.079220000 | 22.611290000 |
| C | 18.603160000 | 12.305310000 | 21.609170000 |
| C | 18.337400000 | 8.822850000  | 19.998750000 |
| C | 21.175730000 | 10.557280000 | 23.848470000 |
| C | 18.857260000 | 15.625300000 | 23.573130000 |
| C | 20.215180000 | 15.559000000 | 24.011880000 |
| C | 20.498000000 | 14.850090000 | 25.198040000 |
| C | 19.497090000 | 14.208570000 | 25.964730000 |
| C | 18.168040000 | 14.263960000 | 25.493910000 |
| C | 17.857040000 | 14.958460000 | 24.313810000 |
| C | 21.330170000 | 16.205220000 | 23.223920000 |
| C | 19.842450000 | 13.501800000 | 27.256510000 |
| C | 19.900670000 | 17.816140000 | 16.436070000 |
| C | 20.948910000 | 18.711540000 | 16.066920000 |
| C | 21.667840000 | 18.444010000 | 14.884200000 |
| C | 21.411910000 | 17.313290000 | 14.075630000 |
| C | 20.374290000 | 16.440640000 | 14.465620000 |
| C | 19.621010000 | 16.696660000 | 15.622590000 |
| C | 21.330080000 | 19.887090000 | 16.936680000 |

|   |              |              |              |
|---|--------------|--------------|--------------|
| C | 22.249520000 | 17.025680000 | 12.851460000 |
| C | 12.450120000 | 13.148790000 | 12.351840000 |
| C | 11.630490000 | 13.938810000 | 11.494200000 |
| C | 10.605850000 | 13.291170000 | 10.769490000 |
| C | 10.365610000 | 11.903050000 | 10.841280000 |
| C | 11.185500000 | 11.141410000 | 11.702990000 |
| C | 12.202660000 | 11.756530000 | 12.446760000 |
| C | 11.839730000 | 15.423800000 | 11.323150000 |
| C | 9.290870000  | 11.254970000 | 9.997830000  |
| C | 21.712060000 | 14.688630000 | 17.940650000 |
| C | 22.398530000 | 14.045270000 | 16.868710000 |
| C | 23.521370000 | 14.689270000 | 16.302520000 |
| C | 23.998320000 | 15.937800000 | 16.749820000 |
| C | 23.291670000 | 16.566650000 | 17.800490000 |
| C | 22.171910000 | 15.951720000 | 18.381710000 |
| C | 21.934110000 | 12.720070000 | 16.320570000 |
| C | 25.206970000 | 16.593520000 | 16.117820000 |
| C | 14.090200000 | 18.530570000 | 25.757750000 |
| C | 14.122700000 | 19.905440000 | 26.131850000 |
| C | 13.111400000 | 20.390610000 | 26.990050000 |
| C | 12.080620000 | 19.576280000 | 27.501840000 |
| C | 12.074290000 | 18.214160000 | 27.126370000 |
| C | 13.055410000 | 17.704180000 | 26.263920000 |
| C | 15.189260000 | 20.844930000 | 25.624710000 |
| C | 11.015170000 | 20.136610000 | 28.416610000 |
| C | 12.733150000 | 9.937620000  | 22.689010000 |
| C | 13.706760000 | 9.029940000  | 23.203320000 |



|   |              |              |              |
|---|--------------|--------------|--------------|
| C | 13.640200000 | 8.682380000  | 24.569190000 |
| C | 12.651690000 | 9.185690000  | 25.441930000 |
| C | 11.684300000 | 10.063150000 | 24.904430000 |
| C | 11.727590000 | 10.435450000 | 23.552470000 |
| C | 14.788920000 | 8.444630000  | 22.330220000 |
| C | 12.657380000 | 8.835200000  | 26.911950000 |
| H | 18.341230000 | 23.132810000 | 13.210470000 |
| H | 14.090880000 | 22.369810000 | 12.721680000 |
| H | 13.935340000 | 21.741970000 | 15.134260000 |
| H | 18.446630000 | 23.142350000 | 16.740780000 |
| H | 19.428670000 | 22.863190000 | 15.241910000 |
| H | 18.793230000 | 21.471630000 | 16.209110000 |
| H | 17.225790000 | 23.773720000 | 11.107310000 |
| H | 15.445220000 | 23.575920000 | 10.905970000 |
| H | 16.533870000 | 22.158200000 | 10.732960000 |
| H | 5.723430000  | 11.726650000 | 19.775890000 |
| H | 7.517450000  | 13.962800000 | 16.498910000 |
| H | 9.377510000  | 14.644850000 | 18.004820000 |
| H | 8.471310000  | 11.598880000 | 21.861730000 |
| H | 6.667640000  | 11.656020000 | 21.903850000 |
| H | 7.652910000  | 13.084750000 | 22.417840000 |
| H | 5.642910000  | 11.440230000 | 16.540750000 |
| H | 5.089960000  | 13.135320000 | 16.376180000 |
| H | 4.432180000  | 12.092550000 | 17.694620000 |
| H | 19.713830000 | 12.755700000 | 11.522280000 |
| H | 17.358570000 | 16.404980000 | 11.853810000 |
| H | 16.479520000 | 15.621090000 | 14.052480000 |

|   |              |              |              |
|---|--------------|--------------|--------------|
| H | 19.361430000 | 11.627250000 | 14.854770000 |
| H | 19.678970000 | 11.098670000 | 13.154050000 |
| H | 18.053410000 | 10.874400000 | 13.912550000 |
| H | 20.116190000 | 15.705350000 | 10.362560000 |
| H | 18.463500000 | 15.768050000 | 9.667860000  |
| H | 19.443860000 | 14.259820000 | 9.541770000  |
| H | 10.235270000 | 7.952430000  | 15.454840000 |
| H | 8.672120000  | 10.946410000 | 18.200250000 |
| H | 10.941530000 | 11.969340000 | 18.354820000 |
| H | 13.376550000 | 9.507720000  | 14.817740000 |
| H | 12.459140000 | 7.947720000  | 14.754550000 |
| H | 13.583480000 | 8.314930000  | 16.121970000 |
| H | 7.575790000  | 8.649940000  | 15.653700000 |
| H | 7.156290000  | 9.342890000  | 17.262730000 |
| H | 7.899810000  | 7.710640000  | 17.146000000 |
| H | 9.391100000  | 21.381550000 | 25.324940000 |
| H | 12.934060000 | 22.341410000 | 22.986900000 |
| H | 13.073690000 | 19.961620000 | 22.248500000 |
| H | 8.745520000  | 18.176110000 | 23.928640000 |
| H | 8.458700000  | 19.253140000 | 25.354630000 |
| H | 9.726740000  | 17.961610000 | 25.399710000 |
| H | 10.042890000 | 23.774130000 | 24.947570000 |
| H | 11.526740000 | 24.175460000 | 24.006520000 |
| H | 11.660910000 | 23.566790000 | 25.687990000 |
| H | 9.660560000  | 24.399250000 | 18.429580000 |
| H | 9.651420000  | 21.544640000 | 21.714980000 |
| H | 10.749800000 | 19.859480000 | 20.237960000 |

|   |              |              |              |
|---|--------------|--------------|--------------|
| H | 11.953010000 | 22.821660000 | 16.370710000 |
| H | 10.483180000 | 23.870790000 | 16.323820000 |
| H | 10.399560000 | 22.134820000 | 15.821030000 |
| H | 8.899420000  | 25.127420000 | 20.630990000 |
| H | 9.256910000  | 24.110600000 | 22.077980000 |
| H | 7.755100000  | 23.836370000 | 21.140050000 |
| H | 16.620700000 | 19.197670000 | 10.251810000 |
| H | 19.081610000 | 19.147450000 | 13.842210000 |
| H | 17.055610000 | 18.638290000 | 15.206790000 |
| H | 13.753770000 | 17.700680000 | 11.601150000 |
| H | 14.321200000 | 18.841710000 | 10.316830000 |
| H | 13.500000000 | 19.450330000 | 11.812910000 |
| H | 19.630860000 | 18.525160000 | 10.659130000 |
| H | 20.045530000 | 19.926860000 | 11.698920000 |
| H | 19.005920000 | 20.153290000 | 10.241870000 |
| H | 5.817690000  | 21.421490000 | 20.692490000 |
| H | 7.095960000  | 21.400750000 | 16.536590000 |
| H | 8.182210000  | 19.175480000 | 16.895380000 |
| H | 6.463710000  | 18.042520000 | 21.445010000 |
| H | 6.335520000  | 19.700720000 | 22.162030000 |
| H | 7.947410000  | 18.944060000 | 21.863850000 |
| H | 5.114950000  | 23.228980000 | 19.256290000 |
| H | 5.134530000  | 22.976910000 | 17.473170000 |
| H | 6.546600000  | 23.723210000 | 18.288910000 |
| H | 15.333470000 | 11.467850000 | 27.489350000 |
| H | 17.295290000 | 10.706520000 | 23.682480000 |
| H | 15.659530000 | 12.215580000 | 22.548920000 |

|   |              |              |              |
|---|--------------|--------------|--------------|
| H | 13.531280000 | 14.250280000 | 26.623390000 |
| H | 13.420470000 | 12.775410000 | 27.659100000 |
| H | 12.372490000 | 12.956220000 | 26.192580000 |
| H | 17.761820000 | 10.471570000 | 27.330640000 |
| H | 18.280290000 | 9.826770000  | 25.729260000 |
| H | 16.919600000 | 9.061330000  | 26.621160000 |
| H | 7.090620000  | 14.269830000 | 12.935170000 |
| H | 9.860150000  | 11.606840000 | 14.974890000 |
| H | 11.169610000 | 13.575570000 | 15.751750000 |
| H | 8.051780000  | 17.269310000 | 14.468410000 |
| H | 7.334020000  | 16.574470000 | 12.961540000 |
| H | 9.042150000  | 17.164020000 | 12.987810000 |
| H | 6.891830000  | 11.231790000 | 14.235340000 |
| H | 8.240390000  | 10.753210000 | 13.153230000 |
| H | 6.940190000  | 11.848500000 | 12.547520000 |
| H | 20.135860000 | 8.751460000  | 22.041480000 |
| H | 19.849380000 | 12.912000000 | 23.279820000 |
| H | 18.144010000 | 13.311100000 | 21.508610000 |
| H | 17.237640000 | 8.643210000  | 20.048240000 |
| H | 18.859990000 | 7.883430000  | 20.284160000 |
| H | 18.564440000 | 9.046370000  | 18.930170000 |
| H | 20.892870000 | 11.048000000 | 24.808670000 |
| H | 22.163220000 | 10.981750000 | 23.546430000 |
| H | 21.324410000 | 9.471700000  | 24.042400000 |
| H | 21.553820000 | 14.798660000 | 25.538810000 |
| H | 17.358010000 | 13.748820000 | 26.047160000 |
| H | 16.810440000 | 14.985360000 | 23.947940000 |

|   |              |              |              |
|---|--------------|--------------|--------------|
| H | 21.352100000 | 15.809490000 | 22.178020000 |
| H | 22.320670000 | 16.009340000 | 23.692140000 |
| H | 21.183140000 | 17.308790000 | 23.142610000 |
| H | 20.731620000 | 12.839870000 | 27.140100000 |
| H | 18.992990000 | 12.880390000 | 27.616700000 |
| H | 20.088310000 | 14.233540000 | 28.062950000 |
| H | 22.476630000 | 19.145860000 | 14.590620000 |
| H | 20.134820000 | 15.553710000 | 13.847050000 |
| H | 18.797880000 | 16.009600000 | 15.910720000 |
| H | 20.435480000 | 20.473770000 | 17.251340000 |
| H | 22.039230000 | 20.560830000 | 16.404800000 |
| H | 21.822600000 | 19.540990000 | 17.877520000 |
| H | 22.390040000 | 17.935200000 | 12.223010000 |
| H | 21.778070000 | 16.239280000 | 12.222200000 |
| H | 23.265370000 | 16.661970000 | 13.139200000 |
| H | 9.962970000  | 13.909470000 | 10.109320000 |
| H | 11.024340000 | 10.048720000 | 11.798690000 |
| H | 12.837970000 | 11.147750000 | 13.121050000 |
| H | 11.753420000 | 15.969040000 | 12.295660000 |
| H | 11.089230000 | 15.849660000 | 10.620610000 |
| H | 12.856930000 | 15.642960000 | 10.921010000 |
| H | 8.445440000  | 11.953520000 | 9.807980000  |
| H | 8.879150000  | 10.342700000 | 10.484600000 |
| H | 9.691390000  | 10.944950000 | 9.002780000  |
| H | 24.054240000 | 14.181410000 | 15.471560000 |
| H | 23.629350000 | 17.557350000 | 18.166140000 |
| H | 21.605200000 | 16.459940000 | 19.187810000 |

|   |              |              |              |
|---|--------------|--------------|--------------|
| H | 21.838650000 | 11.952930000 | 17.123250000 |
| H | 22.633290000 | 12.343610000 | 15.542020000 |
| H | 20.920580000 | 12.824270000 | 15.860530000 |
| H | 25.680590000 | 15.933060000 | 15.357940000 |
| H | 25.984910000 | 16.838870000 | 16.879650000 |
| H | 24.929380000 | 17.548570000 | 15.611550000 |
| H | 13.136830000 | 21.464140000 | 27.270940000 |
| H | 11.282260000 | 17.540700000 | 27.512190000 |
| H | 13.019060000 | 16.638080000 | 25.961160000 |
| H | 16.211350000 | 20.477380000 | 25.877120000 |
| H | 15.056660000 | 21.861700000 | 26.056230000 |
| H | 15.151470000 | 20.929270000 | 24.509890000 |
| H | 11.133740000 | 19.758160000 | 29.460130000 |
| H | 9.995940000  | 19.839150000 | 28.076700000 |
| H | 11.053540000 | 21.248090000 | 28.452520000 |
| H | 14.402700000 | 7.980950000  | 24.968550000 |
| H | 10.881220000 | 10.465360000 | 25.554300000 |
| H | 10.967040000 | 11.133270000 | 23.146760000 |
| H | 14.359080000 | 7.886950000  | 21.465650000 |
| H | 15.437930000 | 7.754080000  | 22.912430000 |
| H | 15.437030000 | 9.247120000  | 21.895500000 |
| H | 13.123350000 | 7.841360000  | 27.095780000 |
| H | 11.629600000 | 8.822950000  | 27.339230000 |
| H | 13.246800000 | 9.585490000  | 27.492680000 |
| C | 17.537470000 | 21.577180000 | 21.151310000 |
| H | 17.383190000 | 22.220420000 | 22.050130000 |
| H | 17.558950000 | 22.264000000 | 20.267540000 |

|   |              |              |              |
|---|--------------|--------------|--------------|
| C | 18.904900000 | 20.920620000 | 21.248420000 |
| C | 19.193960000 | 19.591070000 | 20.893550000 |
| C | 20.001230000 | 21.714990000 | 21.651980000 |
| C | 20.525600000 | 19.135400000 | 20.895770000 |
| N | 21.290810000 | 21.291990000 | 21.662840000 |
| C | 21.577610000 | 19.997210000 | 21.262920000 |
| H | 19.844940000 | 22.765190000 | 21.965340000 |
| H | 20.726890000 | 18.094960000 | 20.583430000 |
| C | 23.018520000 | 19.649150000 | 21.224480000 |
| N | 23.884780000 | 20.686410000 | 21.517900000 |
| C | 25.226440000 | 20.448650000 | 21.507970000 |
| H | 25.866480000 | 21.317870000 | 21.758470000 |
| C | 25.816640000 | 19.196470000 | 21.226550000 |
| C | 24.926440000 | 18.141260000 | 20.921780000 |
| H | 25.339390000 | 17.140850000 | 20.677210000 |
| C | 23.538010000 | 18.370900000 | 20.924650000 |
| H | 22.848690000 | 17.538380000 | 20.690660000 |
| H | 23.346480000 | 19.399800000 | 26.377550000 |
| C | 22.953350000 | 20.362490000 | 25.998860000 |
| C | 22.245600000 | 21.260600000 | 26.829610000 |
| C | 23.164030000 | 20.712810000 | 24.660600000 |
| C | 21.797320000 | 22.468100000 | 26.284830000 |
| N | 22.726460000 | 21.884000000 | 24.112990000 |
| C | 22.042950000 | 22.775120000 | 24.925260000 |
| H | 22.048350000 | 21.016470000 | 27.890390000 |
| H | 23.716360000 | 20.036630000 | 23.981710000 |
| H | 21.242710000 | 23.185230000 | 26.915650000 |

|   |              |              |              |
|---|--------------|--------------|--------------|
| C | 21.609220000 | 24.009950000 | 24.267810000 |
| N | 21.892370000 | 24.093020000 | 22.909760000 |
| C | 21.498320000 | 25.213810000 | 22.238730000 |
| H | 21.736510000 | 25.234540000 | 21.159020000 |
| C | 20.834600000 | 26.281900000 | 22.850600000 |
| C | 20.553050000 | 26.209360000 | 24.234520000 |
| H | 20.037850000 | 27.037820000 | 24.754530000 |
| C | 20.942960000 | 25.065060000 | 24.935370000 |
| H | 20.739300000 | 24.980420000 | 26.017760000 |
| C | 26.707460000 | 24.286220000 | 23.498430000 |
| C | 27.104250000 | 25.050970000 | 22.376330000 |
| C | 25.518300000 | 23.554050000 | 23.425320000 |
| C | 26.297690000 | 25.037220000 | 21.233610000 |
| N | 24.721560000 | 23.526720000 | 22.316380000 |
| C | 25.113510000 | 24.261160000 | 21.204980000 |
| H | 28.037230000 | 25.644470000 | 22.397440000 |
| H | 25.158200000 | 22.952190000 | 24.281340000 |
| H | 26.585070000 | 25.632360000 | 20.347520000 |
| C | 24.239030000 | 24.129200000 | 20.036780000 |
| N | 23.142880000 | 23.293210000 | 20.215070000 |
| C | 22.315470000 | 23.077160000 | 19.153620000 |
| H | 21.467420000 | 22.391050000 | 19.335200000 |
| C | 22.497640000 | 23.679210000 | 17.903960000 |
| C | 23.598910000 | 24.546910000 | 17.718910000 |
| H | 23.774270000 | 25.044070000 | 16.745940000 |
| C | 24.468170000 | 24.766560000 | 18.793400000 |
| H | 25.339910000 | 25.435420000 | 18.673170000 |



|    |              |              |              |
|----|--------------|--------------|--------------|
| H  | 20.545880000 | 27.160600000 | 22.246960000 |
| H  | 27.311870000 | 24.262830000 | 24.423950000 |
| H  | 21.776810000 | 23.464380000 | 17.093610000 |
| Ru | 22.947980000 | 22.470720000 | 22.119650000 |
| C  | 27.335980000 | 19.066380000 | 21.306330000 |
| H  | 27.804040000 | 19.840160000 | 20.655140000 |
| H  | 27.640130000 | 19.298500000 | 22.356810000 |
| H  | 18.365520000 | 18.918720000 | 20.598340000 |
| Ag | 33.102330000 | 15.481620000 | 21.506210000 |
| Ag | 33.379240000 | 13.295050000 | 23.257060000 |
| Ag | 30.809770000 | 13.906340000 | 22.012990000 |
| Ag | 34.942860000 | 15.708000000 | 23.664450000 |
| Ag | 31.897150000 | 15.667690000 | 24.020480000 |
| Ag | 35.459360000 | 17.010780000 | 21.137640000 |
| Ag | 32.779220000 | 17.705180000 | 19.859650000 |
| Ag | 31.372030000 | 15.219210000 | 19.308140000 |
| Ag | 30.627980000 | 16.972710000 | 21.645260000 |
| Ag | 35.597020000 | 14.123230000 | 21.328770000 |
| Ag | 34.302210000 | 15.167340000 | 18.957270000 |
| Ag | 33.202030000 | 18.050090000 | 22.679160000 |
| Ag | 32.932340000 | 12.944170000 | 20.267440000 |
| Ag | 30.656300000 | 18.249270000 | 24.564230000 |
| Ag | 36.163040000 | 12.797710000 | 24.217150000 |
| Ag | 29.403270000 | 17.531570000 | 18.896210000 |
| Ag | 37.303700000 | 15.404860000 | 19.004510000 |
| Ag | 31.850630000 | 10.881210000 | 22.121140000 |
| Ag | 34.030010000 | 14.698000000 | 26.269290000 |

|    |              |              |              |
|----|--------------|--------------|--------------|
| Ag | 32.625500000 | 16.979620000 | 17.042090000 |
| Ag | 35.744760000 | 12.405530000 | 18.942390000 |
| Ag | 34.895870000 | 19.890470000 | 20.608810000 |
| Ag | 35.913900000 | 18.664400000 | 23.738440000 |
| Ag | 29.902410000 | 12.382840000 | 19.601100000 |
| Ag | 28.626740000 | 15.769980000 | 23.384730000 |
| S  | 36.509530000 | 20.546430000 | 22.316110000 |
| S  | 33.663680000 | 10.836420000 | 23.759550000 |
| S  | 37.360200000 | 17.756100000 | 19.677620000 |
| S  | 28.009490000 | 17.400710000 | 20.888290000 |
| S  | 28.333280000 | 13.567260000 | 22.371790000 |
| S  | 37.138130000 | 12.270550000 | 22.029310000 |
| S  | 36.022970000 | 17.027950000 | 25.542460000 |
| S  | 32.705750000 | 19.605340000 | 24.597320000 |
| S  | 35.584980000 | 12.851300000 | 26.595350000 |
| S  | 33.997330000 | 10.799140000 | 19.489370000 |
| S  | 32.128850000 | 16.232820000 | 26.470950000 |
| S  | 29.271150000 | 14.329970000 | 18.260980000 |
| S  | 34.916150000 | 16.210560000 | 16.743340000 |
| S  | 33.544230000 | 19.729610000 | 18.576200000 |
| S  | 28.239430000 | 17.881120000 | 24.587340000 |
| S  | 30.317190000 | 17.632440000 | 16.639120000 |
| S  | 37.660620000 | 13.331810000 | 17.767840000 |
| S  | 29.914040000 | 10.253800000 | 20.788040000 |
| C  | 35.849100000 | 21.975950000 | 23.167060000 |
| C  | 35.661850000 | 23.201670000 | 22.462820000 |
| C  | 35.215390000 | 24.328760000 | 23.184370000 |

|   |              |              |              |
|---|--------------|--------------|--------------|
| C | 34.954650000 | 24.296500000 | 24.570010000 |
| C | 35.164900000 | 23.076140000 | 25.249980000 |
| C | 35.602280000 | 21.935510000 | 24.560110000 |
| C | 35.901100000 | 23.301080000 | 20.977800000 |
| C | 34.425550000 | 25.513300000 | 25.295110000 |
| C | 32.815320000 | 10.497710000 | 25.304070000 |
| C | 32.665990000 | 9.144540000  | 25.728080000 |
| C | 32.086140000 | 8.901630000  | 26.993840000 |
| C | 31.656700000 | 9.937150000  | 27.852620000 |
| C | 31.800970000 | 11.268400000 | 27.403850000 |
| C | 32.363640000 | 11.538000000 | 26.147710000 |
| C | 33.094230000 | 7.993810000  | 24.849520000 |
| C | 31.031690000 | 9.636040000  | 29.197090000 |
| C | 38.885910000 | 17.904570000 | 20.608560000 |
| C | 40.088140000 | 18.205840000 | 19.901250000 |
| C | 41.273740000 | 18.380220000 | 20.648310000 |
| C | 41.313420000 | 18.286670000 | 22.056900000 |
| C | 40.108970000 | 17.992950000 | 22.735240000 |
| C | 38.919150000 | 17.796010000 | 22.017180000 |
| C | 40.101550000 | 18.351330000 | 18.398070000 |
| C | 42.602250000 | 18.513980000 | 22.816200000 |
| C | 28.082630000 | 12.420110000 | 23.726240000 |
| C | 26.758470000 | 12.203720000 | 24.218620000 |
| C | 26.568920000 | 11.225670000 | 25.217690000 |
| C | 27.627850000 | 10.447070000 | 25.739170000 |
| C | 28.927610000 | 10.687150000 | 25.246710000 |
| C | 29.148320000 | 11.664700000 | 24.262750000 |

|   |              |              |              |
|---|--------------|--------------|--------------|
| C | 25.579200000 | 12.982500000 | 23.685280000 |
| C | 27.374350000 | 9.392630000  | 26.794850000 |
| C | 38.834730000 | 12.841630000 | 22.132460000 |
| C | 39.836510000 | 11.922960000 | 22.574840000 |
| C | 41.179120000 | 12.356910000 | 22.593510000 |
| C | 41.575170000 | 13.646220000 | 22.173180000 |
| C | 40.568090000 | 14.535990000 | 21.742360000 |
| C | 39.219790000 | 14.140260000 | 21.730010000 |
| C | 39.489140000 | 10.513710000 | 22.990740000 |
| C | 43.034330000 | 14.048240000 | 22.157150000 |
| C | 37.782890000 | 16.677750000 | 25.604010000 |
| C | 38.632760000 | 17.529710000 | 26.370600000 |
| C | 39.992240000 | 17.170630000 | 26.507050000 |
| C | 40.540980000 | 16.008960000 | 25.920480000 |
| C | 39.685870000 | 15.197680000 | 25.141520000 |
| C | 38.333220000 | 15.534380000 | 24.980980000 |
| C | 38.106170000 | 18.785910000 | 27.020700000 |
| C | 41.987860000 | 15.622920000 | 26.137910000 |
| C | 32.140230000 | 21.163180000 | 23.917300000 |
| C | 31.560190000 | 22.135510000 | 24.785270000 |
| C | 31.198750000 | 23.389540000 | 24.243720000 |
| C | 31.403640000 | 23.725110000 | 22.888980000 |
| C | 31.973140000 | 22.744230000 | 22.046090000 |
| C | 32.326850000 | 21.486420000 | 22.553480000 |
| C | 31.349810000 | 21.849590000 | 26.251130000 |
| C | 31.039980000 | 25.088450000 | 22.342320000 |
| C | 36.978110000 | 13.489780000 | 27.523750000 |

|   |              |              |              |
|---|--------------|--------------|--------------|
| C | 38.221900000 | 12.790700000 | 27.525420000 |
| C | 39.260420000 | 13.271710000 | 28.352540000 |
| C | 39.121560000 | 14.405120000 | 29.179020000 |
| C | 37.876520000 | 15.074360000 | 29.171020000 |
| C | 36.825610000 | 14.623960000 | 28.357410000 |
| C | 38.457260000 | 11.585550000 | 26.649370000 |
| C | 40.278190000 | 14.909410000 | 30.012670000 |
| C | 33.409430000 | 10.414630000 | 17.836040000 |
| C | 34.047260000 | 9.373860000  | 17.095410000 |
| C | 33.526320000 | 9.037330000  | 15.827180000 |
| C | 32.399710000 | 9.677730000  | 15.265350000 |
| C | 31.797350000 | 10.716850000 | 16.007340000 |
| C | 32.299990000 | 11.080530000 | 17.267220000 |
| C | 35.255820000 | 8.647820000  | 17.633640000 |
| C | 31.833990000 | 9.248420000  | 13.929050000 |
| C | 30.918800000 | 15.222950000 | 27.329150000 |
| C | 30.928020000 | 15.195190000 | 28.755850000 |
| C | 29.947810000 | 14.422880000 | 29.415750000 |
| C | 28.963720000 | 13.683780000 | 28.721600000 |
| C | 28.964850000 | 13.740940000 | 27.310470000 |
| C | 29.928480000 | 14.498900000 | 26.627640000 |
| C | 31.966410000 | 15.950560000 | 29.549740000 |
| C | 27.958990000 | 12.824540000 | 29.458210000 |
| C | 29.569550000 | 13.888060000 | 16.549200000 |
| C | 28.510050000 | 13.294880000 | 15.800020000 |
| C | 28.727670000 | 13.041650000 | 14.426050000 |
| C | 29.934090000 | 13.363880000 | 13.767510000 |

|   |              |              |              |
|---|--------------|--------------|--------------|
| C | 30.972490000 | 13.938540000 | 14.535260000 |
| C | 30.792550000 | 14.185090000 | 15.903660000 |
| C | 27.189180000 | 12.943820000 | 16.443750000 |
| C | 30.121850000 | 13.112220000 | 12.286970000 |
| C | 34.707910000 | 15.050440000 | 15.388420000 |
| C | 34.647760000 | 15.550000000 | 14.051360000 |
| C | 34.563500000 | 14.618900000 | 12.994760000 |
| C | 34.531360000 | 13.221280000 | 13.201540000 |
| C | 34.577760000 | 12.751800000 | 14.532600000 |
| C | 34.664270000 | 13.654400000 | 15.605570000 |
| C | 34.630170000 | 17.031220000 | 13.758770000 |
| C | 34.468560000 | 12.261730000 | 12.033090000 |
| C | 32.271260000 | 20.977360000 | 18.746330000 |
| C | 32.494280000 | 22.262530000 | 18.161330000 |
| C | 31.446460000 | 23.206580000 | 18.191810000 |
| C | 30.189460000 | 22.935900000 | 18.776460000 |
| C | 30.005950000 | 21.674150000 | 19.377830000 |
| C | 31.025950000 | 20.707570000 | 19.359240000 |
| C | 33.807170000 | 22.609400000 | 17.503430000 |
| C | 29.067590000 | 23.949680000 | 18.719540000 |
| C | 27.567390000 | 17.301030000 | 26.148480000 |
| C | 28.021310000 | 17.746480000 | 27.424090000 |
| C | 27.369770000 | 17.242710000 | 28.570910000 |
| C | 26.284310000 | 16.343140000 | 28.512680000 |
| C | 25.834760000 | 15.937200000 | 27.236380000 |
| C | 26.471970000 | 16.405360000 | 26.077490000 |
| C | 29.158990000 | 18.724570000 | 27.581090000 |

|   |              |              |              |
|---|--------------|--------------|--------------|
| C | 25.617650000 | 15.843150000 | 29.774200000 |
| C | 30.409290000 | 19.304840000 | 16.017800000 |
| C | 29.245030000 | 20.126520000 | 15.966820000 |
| C | 29.346290000 | 21.398320000 | 15.360870000 |
| C | 30.540550000 | 21.884770000 | 14.790010000 |
| C | 31.677150000 | 21.046080000 | 14.839010000 |
| C | 31.614860000 | 19.787010000 | 15.451840000 |
| C | 27.926330000 | 19.658710000 | 16.527620000 |
| C | 30.619030000 | 23.261920000 | 14.169400000 |
| C | 39.051290000 | 12.401390000 | 18.406210000 |
| C | 40.369590000 | 12.944210000 | 18.369420000 |
| C | 41.442940000 | 12.123690000 | 18.778580000 |
| C | 41.270480000 | 10.794860000 | 19.218090000 |
| C | 39.956740000 | 10.275660000 | 19.236680000 |
| C | 38.868270000 | 11.066740000 | 18.842300000 |
| C | 40.631920000 | 14.362500000 | 17.930340000 |
| C | 42.448240000 | 9.950840000  | 19.651820000 |
| C | 30.553150000 | 8.971920000  | 19.713530000 |
| C | 29.907850000 | 8.667750000  | 18.478320000 |
| C | 30.401750000 | 7.588980000  | 17.713670000 |
| C | 31.491040000 | 6.790800000  | 18.124250000 |
| C | 32.098350000 | 7.096750000  | 19.361870000 |
| C | 31.639140000 | 8.170610000  | 20.139600000 |
| C | 28.744660000 | 9.482120000  | 17.970240000 |
| C | 32.024920000 | 5.680080000  | 17.246950000 |
| H | 35.063070000 | 25.278390000 | 22.629960000 |
| H | 34.975660000 | 23.013430000 | 26.340140000 |

|   |              |              |              |
|---|--------------|--------------|--------------|
| H | 35.749420000 | 20.981570000 | 25.107100000 |
| H | 36.928090000 | 22.969260000 | 20.699290000 |
| H | 35.746950000 | 24.340540000 | 20.613590000 |
| H | 35.198190000 | 22.627680000 | 20.424760000 |
| H | 34.653960000 | 26.450500000 | 24.740790000 |
| H | 34.855400000 | 25.602910000 | 26.318530000 |
| H | 33.316190000 | 25.453490000 | 25.409110000 |
| H | 31.968170000 | 7.849030000  | 27.325230000 |
| H | 31.460090000 | 12.109860000 | 28.038110000 |
| H | 32.459050000 | 12.589140000 | 25.803400000 |
| H | 32.498140000 | 7.971360000  | 23.905300000 |
| H | 32.955430000 | 7.022370000  | 25.372250000 |
| H | 34.160620000 | 8.086850000  | 24.541280000 |
| H | 29.920300000 | 9.735510000  | 29.154310000 |
| H | 31.390500000 | 10.343000000 | 29.979180000 |
| H | 31.259720000 | 8.600810000  | 29.535230000 |
| H | 42.210010000 | 18.610150000 | 20.098100000 |
| H | 40.098100000 | 17.894500000 | 23.838650000 |
| H | 37.984520000 | 17.540880000 | 22.558890000 |
| H | 39.679810000 | 17.449290000 | 17.894330000 |
| H | 41.135400000 | 18.516840000 | 18.023990000 |
| H | 39.465330000 | 19.206580000 | 18.069510000 |
| H | 43.493000000 | 18.341170000 | 22.171240000 |
| H | 42.677160000 | 17.844030000 | 23.703040000 |
| H | 42.667920000 | 19.561720000 | 23.195120000 |
| H | 25.539470000 | 11.056740000 | 25.598320000 |
| H | 29.785870000 | 10.112280000 | 25.644860000 |



|   |              |              |              |
|---|--------------|--------------|--------------|
| H | 30.179040000 | 11.852720000 | 23.893790000 |
| H | 25.762380000 | 14.082170000 | 23.736250000 |
| H | 24.656440000 | 12.748710000 | 24.261370000 |
| H | 25.390180000 | 12.751720000 | 22.610920000 |
| H | 26.863680000 | 9.823510000  | 27.688040000 |
| H | 28.327310000 | 8.929390000  | 27.135120000 |
| H | 26.719500000 | 8.575050000  | 26.410440000 |
| H | 41.953290000 | 11.642280000 | 22.943930000 |
| H | 40.833990000 | 15.563980000 | 21.428290000 |
| H | 38.438520000 | 14.861180000 | 21.409690000 |
| H | 38.711740000 | 10.496450000 | 23.790180000 |
| H | 40.389460000 | 9.974470000  | 23.360610000 |
| H | 39.061380000 | 9.942450000  | 22.134120000 |
| H | 43.585970000 | 13.635020000 | 23.032470000 |
| H | 43.149940000 | 15.155080000 | 22.161220000 |
| H | 43.548460000 | 13.666670000 | 21.241640000 |
| H | 40.651530000 | 17.836510000 | 27.102710000 |
| H | 40.081300000 | 14.291330000 | 24.642170000 |
| H | 37.674920000 | 14.888310000 | 24.361650000 |
| H | 37.740010000 | 19.510070000 | 26.252880000 |
| H | 38.895540000 | 19.286440000 | 27.623440000 |
| H | 37.236110000 | 18.563890000 | 27.681040000 |
| H | 42.589450000 | 16.477360000 | 26.522270000 |
| H | 42.459450000 | 15.256420000 | 25.196900000 |
| H | 42.071140000 | 14.795650000 | 26.883850000 |
| H | 30.755460000 | 24.145750000 | 24.926280000 |
| H | 32.144600000 | 22.963480000 | 20.973790000 |

|   |              |              |              |
|---|--------------|--------------|--------------|
| H | 32.771880000 | 20.726190000 | 21.876010000 |
| H | 30.723150000 | 20.938920000 | 26.398520000 |
| H | 30.859090000 | 22.709090000 | 26.760260000 |
| H | 32.318830000 | 21.637640000 | 26.761040000 |
| H | 30.338060000 | 25.000620000 | 21.479920000 |
| H | 31.937280000 | 25.631990000 | 21.962550000 |
| H | 30.564650000 | 25.732260000 | 23.116260000 |
| H | 40.228640000 | 12.728260000 | 28.349410000 |
| H | 37.727060000 | 15.967680000 | 29.810040000 |
| H | 35.856740000 | 15.163010000 | 28.354080000 |
| H | 37.699770000 | 10.787410000 | 26.826910000 |
| H | 39.471250000 | 11.158260000 | 26.816050000 |
| H | 38.369810000 | 11.864120000 | 25.569050000 |
| H | 41.083470000 | 14.145810000 | 30.094250000 |
| H | 39.956510000 | 15.182200000 | 31.044160000 |
| H | 40.729130000 | 15.823940000 | 29.556340000 |
| H | 34.034550000 | 8.235410000  | 15.251090000 |
| H | 30.931380000 | 11.264930000 | 15.587830000 |
| H | 31.822550000 | 11.908800000 | 17.833600000 |
| H | 36.110680000 | 9.350070000  | 17.784650000 |
| H | 35.582670000 | 7.849360000  | 16.932030000 |
| H | 35.041260000 | 8.188580000  | 18.626070000 |
| H | 32.624340000 | 8.847010000  | 13.254620000 |
| H | 31.327880000 | 10.095490000 | 13.413740000 |
| H | 31.071350000 | 8.442180000  | 14.056160000 |
| H | 29.958650000 | 14.402930000 | 30.526000000 |
| H | 28.210250000 | 13.173720000 | 26.731360000 |

|   |              |              |              |
|---|--------------|--------------|--------------|
| H | 29.920700000 | 14.528170000 | 25.516970000 |
| H | 32.987210000 | 15.539580000 | 29.359350000 |
| H | 31.762930000 | 15.882100000 | 30.641210000 |
| H | 32.005300000 | 17.024970000 | 29.255030000 |
| H | 28.383900000 | 11.818260000 | 29.690640000 |
| H | 27.047210000 | 12.661500000 | 28.841470000 |
| H | 27.649110000 | 13.277220000 | 30.427720000 |
| H | 27.908570000 | 12.572010000 | 13.842270000 |
| H | 31.943820000 | 14.183030000 | 14.063020000 |
| H | 31.625350000 | 14.617200000 | 16.497310000 |
| H | 27.328780000 | 12.258640000 | 17.313660000 |
| H | 26.510050000 | 12.449850000 | 15.714170000 |
| H | 26.677180000 | 13.847830000 | 16.848680000 |
| H | 31.063890000 | 12.550310000 | 12.084890000 |
| H | 30.194450000 | 14.071440000 | 11.722060000 |
| H | 29.275340000 | 12.532190000 | 11.856720000 |
| H | 34.515920000 | 15.013130000 | 11.958450000 |
| H | 34.529410000 | 11.665320000 | 14.745290000 |
| H | 34.689680000 | 13.267260000 | 16.645390000 |
| H | 33.691710000 | 17.497500000 | 14.148150000 |
| H | 34.683460000 | 17.223760000 | 12.664630000 |
| H | 35.471710000 | 17.560770000 | 14.260860000 |
| H | 33.855530000 | 12.669720000 | 11.197400000 |
| H | 34.035160000 | 11.282930000 | 12.337160000 |
| H | 35.485730000 | 12.058920000 | 11.621070000 |
| H | 31.622300000 | 24.197260000 | 17.722320000 |
| H | 29.045840000 | 21.444200000 | 19.881170000 |

|   |              |              |              |
|---|--------------|--------------|--------------|
| H | 30.858200000 | 19.718170000 | 19.834900000 |
| H | 34.661960000 | 22.487400000 | 18.209630000 |
| H | 33.801530000 | 23.658180000 | 17.133110000 |
| H | 34.018220000 | 21.930390000 | 16.645160000 |
| H | 29.430190000 | 24.980720000 | 18.939970000 |
| H | 28.262840000 | 23.698070000 | 19.446420000 |
| H | 28.602990000 | 23.975180000 | 17.704090000 |
| H | 27.744020000 | 17.567050000 | 29.563480000 |
| H | 24.986260000 | 15.229160000 | 27.145620000 |
| H | 26.128200000 | 16.068180000 | 25.078980000 |
| H | 30.112790000 | 18.322480000 | 27.157410000 |
| H | 29.335940000 | 18.959910000 | 28.654110000 |
| H | 28.946080000 | 19.677900000 | 27.043140000 |
| H | 26.360410000 | 15.667280000 | 30.584500000 |
| H | 25.076560000 | 14.888630000 | 29.591840000 |
| H | 24.871980000 | 16.576260000 | 30.165480000 |
| H | 28.435870000 | 22.032090000 | 15.320710000 |
| H | 32.632330000 | 21.383210000 | 14.390140000 |
| H | 32.524150000 | 19.154070000 | 15.503350000 |
| H | 27.563290000 | 18.740980000 | 16.006640000 |
| H | 27.149020000 | 20.449900000 | 16.437680000 |
| H | 28.023690000 | 19.379760000 | 17.607970000 |
| H | 29.609330000 | 23.711470000 | 14.041240000 |
| H | 31.110840000 | 23.236790000 | 13.169710000 |
| H | 31.218170000 | 23.955410000 | 14.807490000 |
| H | 42.465060000 | 12.556010000 | 18.761330000 |
| H | 39.776830000 | 9.236930000  | 19.577380000 |

|   |              |              |              |
|---|--------------|--------------|--------------|
| H | 37.842820000 | 10.647540000 | 18.883390000 |
| H | 40.227980000 | 14.558240000 | 16.910320000 |
| H | 41.721510000 | 14.585780000 | 17.933900000 |
| H | 40.128090000 | 15.087260000 | 18.616410000 |
| H | 42.771640000 | 9.251100000  | 18.844810000 |
| H | 42.190450000 | 9.327490000  | 20.538250000 |
| H | 43.323700000 | 10.583410000 | 19.918520000 |
| H | 29.903210000 | 7.360790000  | 16.748940000 |
| H | 32.944240000 | 6.482010000  | 19.729130000 |
| H | 32.136270000 | 8.406910000  | 21.102240000 |
| H | 27.927240000 | 9.551080000  | 18.725120000 |
| H | 28.331090000 | 9.048150000  | 17.033640000 |
| H | 29.061340000 | 10.533070000 | 17.751210000 |
| H | 31.231050000 | 5.244680000  | 16.599620000 |
| H | 32.468420000 | 4.857780000  | 17.851770000 |
| H | 32.827880000 | 6.063030000  | 16.571150000 |

#### E Isomer

|    |              |              |              |
|----|--------------|--------------|--------------|
| Ag | 14.870350000 | 17.499300000 | 19.932980000 |
| Ag | 12.152760000 | 16.774370000 | 20.332600000 |
| Ag | 13.933700000 | 15.069680000 | 18.810200000 |
| Ag | 12.939080000 | 19.565790000 | 20.093290000 |
| Ag | 13.102630000 | 17.658230000 | 17.740170000 |
| Ag | 15.771550000 | 19.936950000 | 20.996210000 |
| Ag | 17.565350000 | 18.140980000 | 19.323780000 |
| Ag | 16.755300000 | 15.421300000 | 19.910540000 |
| Ag | 15.867690000 | 16.888230000 | 17.343860000 |

|    |              |              |              |
|----|--------------|--------------|--------------|
| Ag | 13.833390000 | 18.211340000 | 22.459140000 |
| Ag | 16.567420000 | 17.270210000 | 22.165090000 |
| Ag | 15.345460000 | 19.641440000 | 18.130530000 |
| Ag | 14.455530000 | 15.275630000 | 21.664640000 |
| Ag | 14.141690000 | 18.585580000 | 15.148920000 |
| Ag | 10.573470000 | 18.503500000 | 22.140770000 |
| Ag | 18.755040000 | 15.642720000 | 17.776570000 |
| Ag | 16.104980000 | 19.694360000 | 24.093930000 |
| Ag | 12.048530000 | 13.653150000 | 20.896420000 |
| Ag | 10.400040000 | 18.913710000 | 18.674500000 |
| Ag | 19.495060000 | 16.574240000 | 21.012260000 |
| Ag | 14.838830000 | 16.354810000 | 24.510630000 |
| Ag | 17.691550000 | 21.359080000 | 19.255250000 |
| Ag | 14.308010000 | 22.156140000 | 19.353460000 |
| Ag | 15.210310000 | 12.643630000 | 20.042690000 |
| Ag | 14.275240000 | 15.130470000 | 15.553220000 |
| S  | 16.392630000 | 23.421020000 | 19.445160000 |
| S  | 10.343490000 | 15.331750000 | 21.338580000 |
| S  | 16.215650000 | 21.745860000 | 22.780180000 |
| S  | 17.275260000 | 15.421510000 | 15.843110000 |
| S  | 14.005870000 | 13.251400000 | 17.080590000 |
| S  | 11.945510000 | 18.183230000 | 24.130670000 |
| S  | 11.911920000 | 21.703270000 | 19.200190000 |
| S  | 14.627760000 | 20.829410000 | 16.036580000 |
| S  | 8.794400000  | 18.795280000 | 20.500750000 |
| S  | 13.780550000 | 14.250330000 | 23.874600000 |
| S  | 11.297170000 | 18.798920000 | 16.394440000 |

|   |              |              |              |
|---|--------------|--------------|--------------|
| S | 17.497760000 | 13.098710000 | 19.298580000 |
| S | 18.859650000 | 17.460790000 | 23.208050000 |
| S | 19.531610000 | 19.739180000 | 19.274330000 |
| S | 14.322100000 | 16.663990000 | 13.656460000 |
| S | 20.684500000 | 15.378160000 | 19.251910000 |
| S | 15.958230000 | 18.042170000 | 25.878790000 |
| S | 13.103120000 | 11.502220000 | 20.498210000 |
| C | 16.505820000 | 24.226060000 | 17.842070000 |
| C | 17.732280000 | 24.816360000 | 17.418720000 |
| C | 17.768140000 | 25.472820000 | 16.170340000 |
| C | 16.643520000 | 25.574690000 | 15.326020000 |
| C | 15.433460000 | 25.000530000 | 15.774120000 |
| C | 15.366310000 | 24.338790000 | 17.009590000 |
| C | 18.987960000 | 24.720270000 | 18.250250000 |
| C | 16.743230000 | 26.235490000 | 13.970470000 |
| C | 9.073070000  | 14.993480000 | 20.115310000 |
| C | 8.020020000  | 14.087300000 | 20.441810000 |
| C | 6.976660000  | 13.912710000 | 19.506540000 |
| C | 6.929050000  | 14.597040000 | 18.271650000 |
| C | 7.986510000  | 15.481380000 | 17.967450000 |
| C | 9.043290000  | 15.664640000 | 18.872650000 |
| C | 8.014520000  | 13.315790000 | 21.739450000 |
| C | 5.806620000  | 14.355620000 | 17.286120000 |
| C | 17.962550000 | 16.392760000 | 14.503560000 |
| C | 18.810340000 | 15.745940000 | 13.555910000 |
| C | 19.307720000 | 16.510890000 | 12.477420000 |
| C | 18.981230000 | 17.870800000 | 12.284880000 |

|   |              |              |              |
|---|--------------|--------------|--------------|
| C | 18.118960000 | 18.481940000 | 13.223780000 |
| C | 17.626220000 | 17.753690000 | 14.317930000 |
| C | 19.152450000 | 14.278380000 | 13.661240000 |
| C | 19.549840000 | 18.656240000 | 11.122800000 |
| C | 12.349580000 | 12.647150000 | 16.751690000 |
| C | 12.161630000 | 11.702710000 | 15.696850000 |
| C | 10.867660000 | 11.181030000 | 15.491030000 |
| C | 9.759690000  | 11.535170000 | 16.294910000 |
| C | 9.972530000  | 12.461150000 | 17.336280000 |
| C | 11.245780000 | 13.015680000 | 17.550350000 |
| C | 13.310460000 | 11.251890000 | 14.827420000 |
| C | 8.391540000  | 10.940430000 | 16.042350000 |
| C | 11.832390000 | 19.780590000 | 24.938720000 |
| C | 10.797740000 | 20.006550000 | 25.896490000 |
| C | 10.768830000 | 21.248060000 | 26.570090000 |
| C | 11.720270000 | 22.267020000 | 26.345100000 |
| C | 12.724580000 | 22.025160000 | 25.381970000 |
| C | 12.774120000 | 20.805060000 | 24.690370000 |
| C | 9.767450000  | 18.947890000 | 26.207320000 |
| C | 11.680280000 | 23.559830000 | 27.130430000 |
| C | 11.281910000 | 22.676510000 | 20.570900000 |
| C | 10.973930000 | 24.053450000 | 20.366250000 |
| C | 10.370900000 | 24.765450000 | 21.425420000 |
| C | 10.058010000 | 24.171690000 | 22.666390000 |
| C | 10.397030000 | 22.813400000 | 22.853560000 |
| C | 11.001930000 | 22.081770000 | 21.821210000 |
| C | 11.280660000 | 24.750570000 | 19.062470000 |



|   |              |              |              |
|---|--------------|--------------|--------------|
| C | 9.353060000  | 24.950500000 | 23.753450000 |
| C | 16.077340000 | 21.349720000 | 15.121250000 |
| C | 15.929740000 | 21.853900000 | 13.792650000 |
| C | 17.075670000 | 22.342510000 | 13.127400000 |
| C | 18.357290000 | 22.363100000 | 13.721700000 |
| C | 18.480070000 | 21.858060000 | 15.033880000 |
| C | 17.359990000 | 21.355270000 | 15.714310000 |
| C | 14.587630000 | 21.872880000 | 13.102710000 |
| C | 19.568580000 | 22.867100000 | 12.966780000 |
| C | 8.102570000  | 20.437120000 | 20.662150000 |
| C | 7.408040000  | 20.801630000 | 21.852410000 |
| C | 6.790580000  | 22.069410000 | 21.905380000 |
| C | 6.833600000  | 22.988000000 | 20.836140000 |
| C | 7.519160000  | 22.600250000 | 19.662520000 |
| C | 8.140500000  | 21.346080000 | 19.577620000 |
| C | 7.348930000  | 19.879230000 | 23.044440000 |
| C | 6.195300000  | 24.353460000 | 20.951770000 |
| C | 15.024730000 | 13.084130000 | 24.438510000 |
| C | 14.972490000 | 12.615290000 | 25.787130000 |
| C | 15.914550000 | 11.649430000 | 26.199000000 |
| C | 16.895730000 | 11.117190000 | 25.332190000 |
| C | 16.931380000 | 11.598680000 | 24.006750000 |
| C | 16.012650000 | 12.568590000 | 23.570500000 |
| C | 13.952350000 | 13.141410000 | 26.766040000 |
| C | 17.863070000 | 10.054200000 | 25.804930000 |
| C | 10.320220000 | 17.513530000 | 15.610120000 |
| C | 9.135870000  | 17.880820000 | 14.904170000 |

|   |              |              |              |
|---|--------------|--------------|--------------|
| C | 8.422590000  | 16.868840000 | 14.224200000 |
| C | 8.829190000  | 15.516200000 | 14.218310000 |
| C | 10.004060000 | 15.178580000 | 14.924930000 |
| C | 10.735920000 | 16.162050000 | 15.607700000 |
| C | 8.642920000  | 19.307960000 | 14.874720000 |
| C | 8.019550000  | 14.449640000 | 13.514350000 |
| C | 18.613030000 | 12.501910000 | 20.567030000 |
| C | 19.223540000 | 11.223120000 | 20.394710000 |
| C | 20.179010000 | 10.806370000 | 21.346200000 |
| C | 20.564110000 | 11.602790000 | 22.447040000 |
| C | 19.936710000 | 12.857030000 | 22.606220000 |
| C | 18.969540000 | 13.290340000 | 21.685040000 |
| C | 18.875570000 | 10.331020000 | 19.226570000 |
| C | 21.640030000 | 11.142510000 | 23.403830000 |
| C | 19.325110000 | 16.148760000 | 24.337550000 |
| C | 20.696950000 | 15.995640000 | 24.707920000 |
| C | 21.030590000 | 15.014150000 | 25.664130000 |
| C | 20.064200000 | 14.178520000 | 26.270930000 |
| C | 18.717420000 | 14.338240000 | 25.879640000 |
| C | 18.356550000 | 15.305300000 | 24.925610000 |
| C | 21.779890000 | 16.836580000 | 24.077060000 |
| C | 20.468180000 | 13.152770000 | 27.307600000 |
| C | 20.333460000 | 19.906790000 | 17.682410000 |
| C | 21.316860000 | 20.928120000 | 17.506070000 |
| C | 21.987210000 | 21.008950000 | 16.267690000 |
| C | 21.754040000 | 20.097670000 | 15.212380000 |
| C | 20.792230000 | 19.086270000 | 15.419860000 |

|   |              |              |              |
|---|--------------|--------------|--------------|
| C | 20.084110000 | 18.998640000 | 16.630890000 |
| C | 21.683240000 | 21.875900000 | 18.624280000 |
| C | 22.532720000 | 20.187150000 | 13.917970000 |
| C | 12.850660000 | 16.241380000 | 12.723660000 |
| C | 12.018970000 | 17.214090000 | 12.098210000 |
| C | 10.978070000 | 16.759480000 | 11.257720000 |
| C | 10.735250000 | 15.394580000 | 10.996160000 |
| C | 11.573540000 | 14.448860000 | 11.628180000 |
| C | 12.605800000 | 14.867970000 | 12.478240000 |
| C | 12.229200000 | 18.694350000 | 12.298960000 |
| C | 9.641730000  | 14.957120000 | 10.046800000 |
| C | 21.911430000 | 16.477680000 | 18.551410000 |
| C | 22.428810000 | 16.236850000 | 17.245690000 |
| C | 23.423940000 | 17.108080000 | 16.750160000 |
| C | 23.962920000 | 18.175560000 | 17.498340000 |
| C | 23.440670000 | 18.386120000 | 18.793430000 |
| C | 22.432680000 | 17.555220000 | 19.303840000 |
| C | 21.905450000 | 15.119550000 | 16.377280000 |
| C | 25.072270000 | 19.046710000 | 16.958620000 |
| C | 14.663510000 | 18.536400000 | 27.021030000 |
| C | 14.712880000 | 19.789920000 | 27.697880000 |
| C | 13.723100000 | 20.069690000 | 28.665290000 |
| C | 12.696540000 | 19.163930000 | 29.001370000 |
| C | 12.672200000 | 17.923670000 | 28.325080000 |
| C | 13.631550000 | 17.621980000 | 27.348210000 |
| C | 15.776610000 | 20.815550000 | 27.395180000 |
| C | 11.650020000 | 19.508570000 | 30.036860000 |

|   |              |              |              |
|---|--------------|--------------|--------------|
| C | 13.202020000 | 10.748370000 | 22.118410000 |
| C | 14.185430000 | 9.752400000  | 22.392450000 |
| C | 14.164200000 | 9.122960000  | 23.654670000 |
| C | 13.217890000 | 9.433090000  | 24.653300000 |
| C | 12.240330000 | 10.407560000 | 24.352130000 |
| C | 12.235400000 | 11.054990000 | 23.107300000 |
| C | 15.246590000 | 9.375740000  | 21.389250000 |
| C | 13.285260000 | 8.783040000  | 26.016100000 |
| H | 18.727340000 | 25.923460000 | 15.839640000 |
| H | 14.526010000 | 25.061130000 | 15.140610000 |
| H | 14.412930000 | 23.872230000 | 17.332860000 |
| H | 18.844560000 | 25.153220000 | 19.268730000 |
| H | 19.833450000 | 25.245000000 | 17.750010000 |
| H | 19.278620000 | 23.651910000 | 18.398190000 |
| H | 17.638200000 | 26.893440000 | 13.901240000 |
| H | 15.844740000 | 26.853790000 | 13.746230000 |
| H | 16.825800000 | 25.467280000 | 13.163990000 |
| H | 6.157380000  | 13.209390000 | 19.764460000 |
| H | 7.995480000  | 16.031290000 | 17.005860000 |
| H | 9.875150000  | 16.350560000 | 18.608610000 |
| H | 8.893420000  | 12.629910000 | 21.798020000 |
| H | 7.089810000  | 12.705460000 | 21.834450000 |
| H | 8.088580000  | 13.994100000 | 22.620650000 |
| H | 6.053930000  | 13.516630000 | 16.590650000 |
| H | 5.618730000  | 15.254060000 | 16.657090000 |
| H | 4.858490000  | 14.082800000 | 17.801360000 |
| H | 19.968970000 | 16.004880000 | 11.743160000 |

|   |              |              |              |
|---|--------------|--------------|--------------|
| H | 17.834900000 | 19.546910000 | 13.111960000 |
| H | 16.955630000 | 18.248870000 | 15.050310000 |
| H | 19.558410000 | 14.013220000 | 14.664700000 |
| H | 19.900420000 | 13.991740000 | 12.889170000 |
| H | 18.245860000 | 13.644470000 | 13.520750000 |
| H | 20.383980000 | 19.322410000 | 11.452700000 |
| H | 18.778840000 | 19.312870000 | 10.658900000 |
| H | 19.954650000 | 17.982420000 | 10.335180000 |
| H | 10.725040000 | 10.451350000 | 14.666670000 |
| H | 9.131550000  | 12.771560000 | 17.986170000 |
| H | 11.386250000 | 13.765410000 | 18.356280000 |
| H | 13.822310000 | 12.116010000 | 14.339810000 |
| H | 12.958460000 | 10.553610000 | 14.036500000 |
| H | 14.093470000 | 10.737260000 | 15.431850000 |
| H | 8.031900000  | 11.163150000 | 15.010010000 |
| H | 7.643950000  | 11.346130000 | 16.758960000 |
| H | 8.398760000  | 9.830350000  | 16.150380000 |
| H | 9.961570000  | 21.422480000 | 27.312270000 |
| H | 13.475510000 | 22.806330000 | 25.148940000 |
| H | 13.559090000 | 20.637890000 | 23.924920000 |
| H | 9.269960000  | 18.572390000 | 25.282660000 |
| H | 8.985710000  | 19.340940000 | 26.895090000 |
| H | 10.246870000 | 18.059330000 | 26.681030000 |
| H | 10.649230000 | 23.807070000 | 27.469600000 |
| H | 12.060920000 | 24.416150000 | 26.528660000 |
| H | 12.318330000 | 23.494280000 | 28.044930000 |
| H | 10.133820000 | 25.838630000 | 21.265830000 |

|   |              |              |              |
|---|--------------|--------------|--------------|
| H | 10.186940000 | 22.316080000 | 23.821030000 |
| H | 11.256690000 | 21.011690000 | 21.977590000 |
| H | 12.374970000 | 24.726640000 | 18.841240000 |
| H | 10.953690000 | 25.813700000 | 19.095280000 |
| H | 10.777680000 | 24.249420000 | 18.202580000 |
| H | 9.489380000  | 26.048380000 | 23.630800000 |
| H | 9.729790000  | 24.664030000 | 24.761350000 |
| H | 8.255660000  | 24.744290000 | 23.744570000 |
| H | 16.955190000 | 22.728570000 | 12.093330000 |
| H | 19.468120000 | 21.850960000 | 15.534420000 |
| H | 17.478800000 | 20.947410000 | 16.741110000 |
| H | 14.148770000 | 20.848840000 | 13.050780000 |
| H | 14.673840000 | 22.273650000 | 12.068630000 |
| H | 13.851660000 | 22.493030000 | 13.665830000 |
| H | 20.017410000 | 22.061410000 | 12.336430000 |
| H | 20.361880000 | 23.212940000 | 13.666700000 |
| H | 19.315160000 | 23.711960000 | 12.286310000 |
| H | 6.252030000  | 22.350880000 | 22.834520000 |
| H | 7.572110000  | 23.292980000 | 18.798750000 |
| H | 8.683990000  | 21.057580000 | 18.654810000 |
| H | 6.937080000  | 18.879270000 | 22.773350000 |
| H | 6.728550000  | 20.314200000 | 23.859140000 |
| H | 8.375350000  | 19.693610000 | 23.449470000 |
| H | 5.547250000  | 24.422690000 | 21.853500000 |
| H | 5.571480000  | 24.596280000 | 20.060650000 |
| H | 6.973130000  | 25.150330000 | 21.031650000 |
| H | 15.874470000 | 11.299030000 | 27.252150000 |

|   |              |              |              |
|---|--------------|--------------|--------------|
| H | 17.695850000 | 11.218210000 | 23.301460000 |
| H | 16.061490000 | 12.944800000 | 22.525890000 |
| H | 14.117070000 | 14.226680000 | 26.972040000 |
| H | 14.009160000 | 12.592770000 | 27.732040000 |
| H | 12.919610000 | 13.051240000 | 26.358070000 |
| H | 18.262760000 | 10.278440000 | 26.821350000 |
| H | 18.726380000 | 9.958900000  | 25.109550000 |
| H | 17.366820000 | 9.055620000  | 25.866870000 |
| H | 7.508810000  | 17.159790000 | 13.665350000 |
| H | 10.355900000 | 14.129210000 | 14.946480000 |
| H | 11.660340000 | 15.875490000 | 16.152810000 |
| H | 8.427480000  | 19.684080000 | 15.903450000 |
| H | 7.714370000  | 19.391240000 | 14.268360000 |
| H | 9.407620000  | 19.997010000 | 14.445650000 |
| H | 7.313670000  | 13.951160000 | 14.222070000 |
| H | 8.678650000  | 13.655430000 | 13.096800000 |
| H | 7.412730000  | 14.872060000 | 12.682200000 |
| H | 20.653230000 | 9.812430000  | 21.209740000 |
| H | 20.196450000 | 13.502660000 | 23.467290000 |
| H | 18.457790000 | 14.263430000 | 21.842440000 |
| H | 17.797870000 | 10.042240000 | 19.238360000 |
| H | 19.487300000 | 9.401840000  | 19.242890000 |
| H | 19.046360000 | 10.853160000 | 18.256770000 |
| H | 21.495390000 | 11.577330000 | 24.418780000 |
| H | 22.647800000 | 11.462170000 | 23.044680000 |
| H | 21.663130000 | 10.033540000 | 23.496680000 |
| H | 22.099270000 | 14.895070000 | 25.943970000 |

|   |              |              |              |
|---|--------------|--------------|--------------|
| H | 17.932150000 | 13.686140000 | 26.311350000 |
| H | 17.294730000 | 15.407430000 | 24.620710000 |
| H | 21.783930000 | 16.699510000 | 22.967320000 |
| H | 22.784580000 | 16.559180000 | 24.467370000 |
| H | 21.607420000 | 17.923950000 | 24.260450000 |
| H | 21.329470000 | 12.534660000 | 26.961730000 |
| H | 19.626560000 | 12.466050000 | 27.545610000 |
| H | 20.785760000 | 13.642220000 | 28.258960000 |
| H | 22.738430000 | 21.815550000 | 16.130400000 |
| H | 20.577650000 | 18.353630000 | 14.618090000 |
| H | 19.323680000 | 18.201630000 | 16.769500000 |
| H | 20.778020000 | 22.314490000 | 19.106410000 |
| H | 22.330680000 | 22.700000000 | 18.248630000 |
| H | 22.236240000 | 21.336950000 | 19.431830000 |
| H | 22.522800000 | 21.219730000 | 13.496990000 |
| H | 22.113220000 | 19.497360000 | 13.152660000 |
| H | 23.602910000 | 19.906780000 | 14.069280000 |
| H | 10.329200000 | 17.521210000 | 10.777990000 |
| H | 11.419420000 | 13.365060000 | 11.450640000 |
| H | 13.260480000 | 14.117700000 | 12.963430000 |
| H | 12.178380000 | 18.971230000 | 13.381070000 |
| H | 11.458860000 | 19.284280000 | 11.755160000 |
| H | 13.234090000 | 19.013450000 | 11.933450000 |
| H | 8.849630000  | 15.732900000 | 9.949480000  |
| H | 9.157260000  | 14.012630000 | 10.383460000 |
| H | 10.047320000 | 14.766370000 | 9.024680000  |
| H | 23.791390000 | 16.943680000 | 15.718290000 |



|   |              |              |              |
|---|--------------|--------------|--------------|
| H | 23.828040000 | 19.226020000 | 19.403240000 |
| H | 21.996020000 | 17.740300000 | 20.305020000 |
| H | 21.968680000 | 14.131920000 | 16.891800000 |
| H | 22.468990000 | 15.058880000 | 15.419770000 |
| H | 20.823530000 | 15.282480000 | 16.137180000 |
| H | 25.220510000 | 18.906150000 | 15.865580000 |
| H | 26.043310000 | 18.796210000 | 17.449900000 |
| H | 24.867640000 | 20.125260000 | 17.146250000 |
| H | 13.759590000 | 21.051090000 | 29.182730000 |
| H | 11.885830000 | 17.178650000 | 28.561390000 |
| H | 13.576440000 | 16.655020000 | 26.807580000 |
| H | 16.799680000 | 20.394770000 | 27.536890000 |
| H | 15.662530000 | 21.708710000 | 28.048320000 |
| H | 15.719270000 | 21.153490000 | 26.329700000 |
| H | 11.714140000 | 18.834800000 | 30.923620000 |
| H | 10.621470000 | 19.400130000 | 29.621020000 |
| H | 11.763430000 | 20.554060000 | 30.398470000 |
| H | 14.933250000 | 8.351150000  | 23.864990000 |
| H | 11.470290000 | 10.668240000 | 25.106100000 |
| H | 11.472380000 | 11.829940000 | 22.890670000 |
| H | 14.803270000 | 9.005360000  | 20.435810000 |
| H | 15.918620000 | 8.591190000  | 21.801050000 |
| H | 15.874550000 | 10.261790000 | 21.119740000 |
| H | 13.841740000 | 7.820050000  | 25.980500000 |
| H | 12.273070000 | 8.584020000  | 26.435820000 |
| H | 13.818440000 | 9.447720000  | 26.738210000 |
| C | 17.764690000 | 22.714820000 | 23.041870000 |

|   |              |              |              |
|---|--------------|--------------|--------------|
| H | 17.624310000 | 23.292470000 | 23.986340000 |
| H | 17.759070000 | 23.463000000 | 22.208680000 |
| C | 19.126300000 | 22.046880000 | 23.052370000 |
| C | 19.373470000 | 20.776120000 | 22.501290000 |
| C | 20.242560000 | 22.741720000 | 23.578190000 |
| C | 20.687760000 | 20.291870000 | 22.419420000 |
| N | 21.520900000 | 22.280810000 | 23.516980000 |
| C | 21.759020000 | 21.060460000 | 22.909500000 |
| H | 20.116500000 | 23.728110000 | 24.068830000 |
| H | 20.863900000 | 19.304560000 | 21.958110000 |
| C | 23.174710000 | 20.652720000 | 22.787770000 |
| N | 24.108750000 | 21.534530000 | 23.292100000 |
| C | 25.435420000 | 21.236280000 | 23.139580000 |
| H | 26.137790000 | 21.984220000 | 23.558300000 |
| C | 25.930800000 | 20.069620000 | 22.505640000 |
| C | 24.960120000 | 19.161830000 | 22.027290000 |
| H | 25.298290000 | 18.236060000 | 21.517350000 |
| C | 23.596110000 | 19.456070000 | 22.173800000 |
| H | 22.844590000 | 18.743870000 | 21.792550000 |
| H | 22.622200000 | 19.016030000 | 27.450770000 |
| C | 22.503970000 | 20.113950000 | 27.386760000 |
| C | 21.884350000 | 20.860470000 | 28.413630000 |
| C | 22.979050000 | 20.790330000 | 26.256040000 |
| C | 21.749860000 | 22.243980000 | 28.246900000 |
| N | 22.861960000 | 22.136630000 | 26.078630000 |
| C | 22.215860000 | 22.868680000 | 27.065860000 |
| H | 21.493800000 | 20.361750000 | 29.320920000 |

|   |              |              |              |
|---|--------------|--------------|--------------|
| H | 23.485070000 | 20.238070000 | 25.442910000 |
| H | 21.245560000 | 22.849820000 | 29.021790000 |
| C | 21.998320000 | 24.287440000 | 26.764570000 |
| N | 22.317140000 | 24.679280000 | 25.473680000 |
| C | 22.149840000 | 25.989300000 | 25.131730000 |
| H | 22.433520000 | 26.257340000 | 24.096680000 |
| C | 21.670900000 | 26.959830000 | 26.018690000 |
| C | 21.334770000 | 26.567370000 | 27.334420000 |
| H | 20.957460000 | 27.305410000 | 28.067470000 |
| C | 21.499810000 | 25.227280000 | 27.699580000 |
| H | 21.257600000 | 24.902740000 | 28.728400000 |
| C | 27.054870000 | 24.548150000 | 26.111340000 |
| C | 27.574600000 | 25.421370000 | 25.127400000 |
| C | 25.824090000 | 23.925130000 | 25.875820000 |
| C | 26.822200000 | 25.650100000 | 23.970850000 |
| N | 25.095960000 | 24.103860000 | 24.736740000 |
| C | 25.576850000 | 24.998180000 | 23.789230000 |
| H | 28.545940000 | 25.931670000 | 25.271410000 |
| H | 25.375300000 | 23.247350000 | 26.625200000 |
| H | 27.197530000 | 26.346420000 | 23.197580000 |
| C | 24.701870000 | 25.206200000 | 22.635820000 |
| N | 23.526390000 | 24.466780000 | 22.652190000 |
| C | 22.672450000 | 24.592650000 | 21.595230000 |
| H | 21.759470000 | 23.969100000 | 21.638480000 |
| C | 22.911630000 | 25.447610000 | 20.513240000 |
| C | 24.096760000 | 26.218960000 | 20.500290000 |
| H | 24.322250000 | 26.907460000 | 19.663840000 |

|    |              |              |              |
|----|--------------|--------------|--------------|
| C  | 24.990500000 | 26.089570000 | 21.567860000 |
| H  | 25.926520000 | 26.676850000 | 21.583080000 |
| H  | 21.572120000 | 28.009030000 | 25.681910000 |
| H  | 27.596780000 | 24.346580000 | 27.053630000 |
| H  | 22.168700000 | 25.502970000 | 19.696000000 |
| Ru | 23.250310000 | 23.208950000 | 24.293130000 |
| C  | 27.436080000 | 19.810660000 | 22.388560000 |
| H  | 27.928220000 | 20.717400000 | 21.965870000 |
| H  | 27.848870000 | 19.655910000 | 23.415010000 |
| H  | 18.518860000 | 20.176480000 | 22.127950000 |
| Ag | 32.397470000 | 15.636410000 | 20.057310000 |
| Ag | 31.649650000 | 14.240430000 | 17.727810000 |
| Ag | 33.200890000 | 16.704450000 | 17.559040000 |
| Ag | 29.917870000 | 14.289990000 | 20.101580000 |
| Ag | 30.437940000 | 16.792250000 | 18.449490000 |
| Ag | 31.521460000 | 14.516010000 | 22.457360000 |
| Ag | 33.160100000 | 17.122700000 | 22.318840000 |
| Ag | 34.944380000 | 16.876730000 | 20.078250000 |
| Ag | 32.304130000 | 18.439150000 | 19.896220000 |
| Ag | 32.420710000 | 12.805600000 | 20.317150000 |
| Ag | 34.473290000 | 14.463330000 | 21.595820000 |
| Ag | 30.314290000 | 17.080350000 | 21.476940000 |
| Ag | 34.533660000 | 14.369560000 | 18.679210000 |
| Ag | 29.232590000 | 19.258280000 | 19.516890000 |
| Ag | 30.368510000 | 11.598980000 | 18.165940000 |
| Ag | 35.158640000 | 19.531170000 | 21.420630000 |
| Ag | 33.638950000 | 12.118440000 | 23.207910000 |

|    |              |              |              |
|----|--------------|--------------|--------------|
| Ag | 34.036780000 | 14.222260000 | 15.771170000 |
| Ag | 28.552970000 | 14.411090000 | 17.524940000 |
| Ag | 35.994690000 | 16.916000000 | 23.125180000 |
| Ag | 35.187820000 | 11.756650000 | 20.253030000 |
| Ag | 31.260120000 | 16.547730000 | 24.500380000 |
| Ag | 28.462700000 | 15.266810000 | 22.816200000 |
| Ag | 36.147350000 | 16.556880000 | 17.045840000 |
| Ag | 32.062530000 | 19.663030000 | 17.217230000 |
| S  | 29.067380000 | 15.669070000 | 25.137510000 |
| S  | 32.195710000 | 12.619820000 | 15.855680000 |
| S  | 32.147400000 | 13.427740000 | 24.630510000 |
| S  | 33.674250000 | 20.537020000 | 19.752510000 |
| S  | 33.851530000 | 18.579400000 | 15.990700000 |
| S  | 32.201950000 | 10.489340000 | 19.350070000 |
| S  | 27.492200000 | 14.296960000 | 20.798580000 |
| S  | 27.879230000 | 18.327720000 | 21.356030000 |
| S  | 28.433090000 | 12.113510000 | 16.754760000 |
| S  | 35.783550000 | 12.316120000 | 17.953660000 |
| S  | 28.116080000 | 16.818370000 | 17.523870000 |
| S  | 36.712940000 | 18.124520000 | 18.841940000 |
| S  | 35.949340000 | 14.519780000 | 23.631170000 |
| S  | 33.501550000 | 17.508650000 | 24.806640000 |
| S  | 30.262980000 | 21.018620000 | 18.151600000 |
| S  | 37.086580000 | 19.083700000 | 22.847310000 |
| S  | 35.419310000 | 10.658730000 | 22.416820000 |
| S  | 35.960050000 | 15.420640000 | 14.891830000 |
| C  | 28.229280000 | 17.114590000 | 25.759800000 |

|   |              |              |              |
|---|--------------|--------------|--------------|
| C | 28.756290000 | 17.787810000 | 26.903480000 |
| C | 28.062030000 | 18.907330000 | 27.397770000 |
| C | 26.863910000 | 19.378170000 | 26.828160000 |
| C | 26.335620000 | 18.671350000 | 25.724490000 |
| C | 27.011190000 | 17.560120000 | 25.195270000 |
| C | 30.030710000 | 17.350870000 | 27.572990000 |
| C | 26.181250000 | 20.599210000 | 27.397000000 |
| C | 31.229250000 | 13.055750000 | 14.408150000 |
| C | 31.392510000 | 12.290310000 | 13.215980000 |
| C | 30.591690000 | 12.614360000 | 12.098450000 |
| C | 29.639640000 | 13.653690000 | 12.117410000 |
| C | 29.496230000 | 14.398060000 | 13.309150000 |
| C | 30.279850000 | 14.102980000 | 14.433820000 |
| C | 32.394790000 | 11.163720000 | 13.133680000 |
| C | 28.809130000 | 13.990710000 | 10.898680000 |
| C | 30.875200000 | 12.257190000 | 25.102620000 |
| C | 31.089720000 | 11.448900000 | 26.259290000 |
| C | 30.071670000 | 10.549110000 | 26.638920000 |
| C | 28.853000000 | 10.427540000 | 25.935000000 |
| C | 28.658710000 | 11.249060000 | 24.802360000 |
| C | 29.659400000 | 12.144370000 | 24.390910000 |
| C | 32.364020000 | 11.548170000 | 27.064160000 |
| C | 27.780460000 | 9.465990000  | 26.399870000 |
| C | 32.799800000 | 21.867200000 | 20.570470000 |
| C | 33.362450000 | 23.177270000 | 20.531520000 |
| C | 32.645080000 | 24.232390000 | 21.138810000 |
| C | 31.395800000 | 24.045000000 | 21.768050000 |

|   |              |              |              |
|---|--------------|--------------|--------------|
| C | 30.849890000 | 22.740600000 | 21.777080000 |
| C | 31.544150000 | 21.671180000 | 21.191890000 |
| C | 34.682390000 | 23.442450000 | 19.846970000 |
| C | 30.657830000 | 25.195980000 | 22.417420000 |
| C | 33.195670000 | 18.213440000 | 14.362310000 |
| C | 33.353350000 | 19.184690000 | 13.327490000 |
| C | 32.929730000 | 18.847580000 | 12.024780000 |
| C | 32.371810000 | 17.589450000 | 11.701890000 |
| C | 32.218300000 | 16.649620000 | 12.742750000 |
| C | 32.615230000 | 16.963890000 | 14.053080000 |
| C | 33.960310000 | 20.538220000 | 13.610440000 |
| C | 31.969160000 | 17.253390000 | 10.282620000 |
| C | 31.374000000 | 9.416240000  | 20.524110000 |
| C | 31.047140000 | 8.082030000  | 20.128750000 |
| C | 30.473140000 | 7.223050000  | 21.091010000 |
| C | 30.226480000 | 7.620920000  | 22.423750000 |
| C | 30.547750000 | 8.946560000  | 22.787580000 |
| C | 31.106530000 | 9.830110000  | 21.849080000 |
| C | 31.334380000 | 7.574510000  | 18.735110000 |
| C | 29.684280000 | 6.641990000  | 23.442250000 |
| C | 27.096860000 | 12.636710000 | 21.357090000 |
| C | 26.002760000 | 12.421290000 | 22.246310000 |
| C | 25.670550000 | 11.088320000 | 22.583380000 |
| C | 26.367350000 | 9.970450000  | 22.072440000 |
| C | 27.458360000 | 10.211400000 | 21.206310000 |
| C | 27.814160000 | 11.522340000 | 20.860930000 |
| C | 25.227120000 | 13.569730000 | 22.845900000 |

|   |              |              |              |
|---|--------------|--------------|--------------|
| C | 25.964380000 | 8.557260000  | 22.431470000 |
| C | 26.973660000 | 11.424400000 | 17.528520000 |
| C | 26.826030000 | 10.009600000 | 17.619640000 |
| C | 25.638720000 | 9.498780000  | 18.186920000 |
| C | 24.599870000 | 10.324390000 | 18.665420000 |
| C | 24.759850000 | 11.723610000 | 18.543680000 |
| C | 25.924980000 | 12.262670000 | 17.979630000 |
| C | 27.914260000 | 9.065380000  | 17.170510000 |
| C | 23.369890000 | 9.739490000  | 19.320430000 |
| C | 37.553850000 | 12.569910000 | 18.124220000 |
| C | 38.429500000 | 11.452140000 | 17.968440000 |
| C | 39.821500000 | 11.680310000 | 18.018090000 |
| C | 40.384120000 | 12.962280000 | 18.208500000 |
| C | 39.498730000 | 14.048620000 | 18.377030000 |
| C | 38.108070000 | 13.851560000 | 18.339830000 |
| C | 37.895860000 | 10.054720000 | 17.765240000 |
| C | 41.883540000 | 13.168970000 | 18.209020000 |
| C | 28.265170000 | 17.213700000 | 15.780860000 |
| C | 27.277060000 | 16.753280000 | 14.856460000 |
| C | 27.331690000 | 17.234500000 | 13.531520000 |
| C | 28.353630000 | 18.095100000 | 13.068630000 |
| C | 29.361800000 | 18.465530000 | 13.980570000 |
| C | 29.305870000 | 18.047090000 | 15.319290000 |
| C | 26.258260000 | 15.710780000 | 15.243780000 |
| C | 28.368590000 | 18.590790000 | 11.640310000 |
| C | 38.324210000 | 17.619830000 | 19.435240000 |
| C | 39.481200000 | 18.160250000 | 18.801160000 |



|   |              |              |              |
|---|--------------|--------------|--------------|
| C | 40.747260000 | 17.815830000 | 19.324280000 |
| C | 40.909820000 | 16.969660000 | 20.442320000 |
| C | 39.747040000 | 16.448880000 | 21.054250000 |
| C | 38.476890000 | 16.766880000 | 20.552400000 |
| C | 39.363160000 | 19.078990000 | 17.608770000 |
| C | 42.283150000 | 16.622790000 | 20.972900000 |
| C | 37.627640000 | 14.016720000 | 23.250240000 |
| C | 38.668480000 | 14.279500000 | 24.194630000 |
| C | 39.957560000 | 13.775500000 | 23.925090000 |
| C | 40.264040000 | 13.029020000 | 22.763330000 |
| C | 39.225950000 | 12.802760000 | 21.834870000 |
| C | 37.932780000 | 13.296150000 | 22.075160000 |
| C | 38.416880000 | 15.104090000 | 25.433600000 |
| C | 41.660720000 | 12.498740000 | 22.522080000 |
| C | 33.233550000 | 19.249190000 | 25.142700000 |
| C | 33.342420000 | 19.705920000 | 26.492150000 |
| C | 33.211720000 | 21.087620000 | 26.742140000 |
| C | 33.011140000 | 22.036650000 | 25.716040000 |
| C | 32.905910000 | 21.561800000 | 24.393060000 |
| C | 33.003640000 | 20.188060000 | 24.112600000 |
| C | 33.622420000 | 18.753530000 | 27.629830000 |
| C | 32.935580000 | 23.514890000 | 26.028350000 |
| C | 29.221120000 | 21.461100000 | 16.766300000 |
| C | 27.864680000 | 21.865280000 | 16.957660000 |
| C | 27.116880000 | 22.260110000 | 15.827310000 |
| C | 27.657550000 | 22.302130000 | 14.523020000 |
| C | 29.015290000 | 21.950750000 | 14.368390000 |

|   |              |              |              |
|---|--------------|--------------|--------------|
| C | 29.778660000 | 21.535280000 | 15.469940000 |
| C | 27.233010000 | 21.891220000 | 18.328490000 |
| C | 26.802780000 | 22.685560000 | 13.334360000 |
| C | 36.893180000 | 19.954730000 | 24.398990000 |
| C | 36.814060000 | 21.378760000 | 24.423500000 |
| C | 36.796120000 | 22.028020000 | 25.676950000 |
| C | 36.863260000 | 21.332190000 | 26.901490000 |
| C | 36.965590000 | 19.923260000 | 26.853000000 |
| C | 36.972420000 | 19.247270000 | 25.624060000 |
| C | 36.747950000 | 22.188420000 | 23.152900000 |
| C | 36.800340000 | 22.069030000 | 28.220610000 |
| C | 34.795770000 | 9.011200000  | 22.102530000 |
| C | 34.205440000 | 8.243310000  | 23.148040000 |
| C | 33.825560000 | 6.914170000  | 22.863860000 |
| C | 34.019280000 | 6.311140000  | 21.603800000 |
| C | 34.622330000 | 7.087050000  | 20.588300000 |
| C | 34.996390000 | 8.416030000  | 20.833570000 |
| C | 33.961840000 | 8.826520000  | 24.517680000 |
| C | 33.599420000 | 4.881070000  | 21.350740000 |
| C | 37.195800000 | 14.127430000 | 14.761400000 |
| C | 38.585870000 | 14.446290000 | 14.788580000 |
| C | 39.513400000 | 13.407700000 | 14.560320000 |
| C | 39.128240000 | 12.075160000 | 14.301440000 |
| C | 37.746930000 | 11.782900000 | 14.276460000 |
| C | 36.799210000 | 12.792550000 | 14.504520000 |
| C | 39.072270000 | 15.846850000 | 15.065700000 |
| C | 40.163820000 | 10.992840000 | 14.094550000 |

|   |              |              |              |
|---|--------------|--------------|--------------|
| H | 28.488250000 | 19.447330000 | 28.267390000 |
| H | 25.389610000 | 18.998800000 | 25.248180000 |
| H | 26.604370000 | 17.031000000 | 24.309700000 |
| H | 29.986510000 | 16.284400000 | 27.889670000 |
| H | 30.252710000 | 17.987420000 | 28.456850000 |
| H | 30.893930000 | 17.424180000 | 26.865670000 |
| H | 25.344850000 | 20.331200000 | 28.085620000 |
| H | 25.749440000 | 21.225370000 | 26.583950000 |
| H | 26.898340000 | 21.222600000 | 27.977410000 |
| H | 30.719520000 | 12.020970000 | 11.169860000 |
| H | 28.772290000 | 15.233440000 | 13.359240000 |
| H | 30.161740000 | 14.706170000 | 15.358810000 |
| H | 33.439490000 | 11.544860000 | 13.234690000 |
| H | 32.310300000 | 10.627400000 | 12.162550000 |
| H | 32.249450000 | 10.431800000 | 13.961320000 |
| H | 29.123510000 | 14.963670000 | 10.451520000 |
| H | 27.730450000 | 14.087850000 | 11.158740000 |
| H | 28.906470000 | 13.217410000 | 10.106180000 |
| H | 30.239800000 | 9.913520000  | 27.533320000 |
| H | 27.723030000 | 11.176470000 | 24.214640000 |
| H | 29.506870000 | 12.764510000 | 23.482400000 |
| H | 33.261320000 | 11.355460000 | 26.429900000 |
| H | 32.362140000 | 10.818510000 | 27.903300000 |
| H | 32.498910000 | 12.572620000 | 27.483660000 |
| H | 28.220650000 | 8.574390000  | 26.901770000 |
| H | 27.153000000 | 9.113560000  | 25.550190000 |
| H | 27.093700000 | 9.949300000  | 27.135920000 |

|   |              |              |              |
|---|--------------|--------------|--------------|
| H | 33.087840000 | 25.249980000 | 21.113230000 |
| H | 29.873430000 | 22.552740000 | 22.268930000 |
| H | 31.108010000 | 20.651340000 | 21.211240000 |
| H | 35.490720000 | 22.791900000 | 20.255630000 |
| H | 34.989820000 | 24.505280000 | 19.960940000 |
| H | 34.624280000 | 23.203520000 | 18.759370000 |
| H | 30.413880000 | 24.968850000 | 23.482470000 |
| H | 29.691170000 | 25.402370000 | 21.898440000 |
| H | 31.258700000 | 26.131920000 | 22.398510000 |
| H | 33.057720000 | 19.603560000 | 11.221480000 |
| H | 31.768420000 | 15.659000000 | 12.535700000 |
| H | 32.462660000 | 16.223050000 | 14.866140000 |
| H | 33.357370000 | 21.103350000 | 14.360630000 |
| H | 34.027640000 | 21.150930000 | 12.684930000 |
| H | 34.979560000 | 20.443270000 | 14.052160000 |
| H | 31.370310000 | 18.070130000 | 9.816050000  |
| H | 31.365600000 | 16.319820000 | 10.249930000 |
| H | 32.863290000 | 17.094470000 | 9.634440000  |
| H | 30.226070000 | 6.185360000  | 20.782310000 |
| H | 30.351790000 | 9.303760000  | 23.817680000 |
| H | 31.350340000 | 10.871020000 | 22.149250000 |
| H | 30.938470000 | 8.263690000  | 17.952620000 |
| H | 30.886390000 | 6.567930000  | 18.577790000 |
| H | 32.433460000 | 7.505420000  | 18.556470000 |
| H | 28.970430000 | 5.920280000  | 22.983840000 |
| H | 29.165280000 | 7.167310000  | 24.275440000 |
| H | 30.507620000 | 6.039510000  | 23.897710000 |

|   |              |              |              |
|---|--------------|--------------|--------------|
| H | 24.829810000 | 10.922240000 | 23.290260000 |
| H | 28.047690000 | 9.364480000  | 20.799040000 |
| H | 28.664630000 | 11.697930000 | 20.167840000 |
| H | 25.899750000 | 14.219190000 | 23.460460000 |
| H | 24.405160000 | 13.198130000 | 23.497820000 |
| H | 24.789420000 | 14.227040000 | 22.058730000 |
| H | 25.176620000 | 8.546050000  | 23.218480000 |
| H | 26.836080000 | 7.966520000  | 22.800370000 |
| H | 25.560790000 | 8.017110000  | 21.540840000 |
| H | 25.529220000 | 8.397120000  | 18.265690000 |
| H | 23.964420000 | 12.406080000 | 18.905480000 |
| H | 26.039860000 | 13.362500000 | 17.897660000 |
| H | 28.211110000 | 9.244720000  | 16.111380000 |
| H | 27.593520000 | 8.005820000  | 17.278950000 |
| H | 28.841280000 | 9.215620000  | 17.778330000 |
| H | 23.294690000 | 8.643640000  | 19.142520000 |
| H | 22.437500000 | 10.220180000 | 18.945190000 |
| H | 23.393610000 | 9.900960000  | 20.425020000 |
| H | 40.497100000 | 10.807230000 | 17.899680000 |
| H | 39.897680000 | 15.066460000 | 18.553430000 |
| H | 37.426640000 | 14.716520000 | 18.485810000 |
| H | 37.350580000 | 9.697940000  | 18.672120000 |
| H | 38.721490000 | 9.339740000  | 17.554190000 |
| H | 37.165750000 | 10.021080000 | 16.924400000 |
| H | 42.418150000 | 12.337830000 | 18.724290000 |
| H | 42.158910000 | 14.122430000 | 18.712340000 |
| H | 42.284600000 | 13.216810000 | 17.167660000 |

|   |              |              |              |
|---|--------------|--------------|--------------|
| H | 26.549380000 | 16.894660000 | 12.820820000 |
| H | 30.210810000 | 19.089120000 | 13.643810000 |
| H | 30.085130000 | 18.380290000 | 16.036130000 |
| H | 26.768220000 | 14.735490000 | 15.446760000 |
| H | 25.524880000 | 15.544750000 | 14.423470000 |
| H | 25.708080000 | 15.979830000 | 16.172220000 |
| H | 28.369140000 | 17.743850000 | 10.913050000 |
| H | 29.268700000 | 19.215100000 | 11.440990000 |
| H | 27.465610000 | 19.207840000 | 11.415070000 |
| H | 41.648640000 | 18.238560000 | 18.834340000 |
| H | 39.829260000 | 15.774910000 | 21.930030000 |
| H | 37.572170000 | 16.341500000 | 21.035910000 |
| H | 38.868850000 | 18.566210000 | 16.749080000 |
| H | 40.361500000 | 19.438490000 | 17.276930000 |
| H | 38.725060000 | 19.961080000 | 17.846230000 |
| H | 42.438860000 | 15.518620000 | 21.001730000 |
| H | 42.421090000 | 16.993250000 | 22.015470000 |
| H | 43.087600000 | 17.065390000 | 20.344930000 |
| H | 40.761090000 | 13.980220000 | 24.663480000 |
| H | 39.426880000 | 12.243850000 | 20.899950000 |
| H | 37.130300000 | 13.120270000 | 21.329700000 |
| H | 38.143690000 | 16.150050000 | 25.151370000 |
| H | 39.322180000 | 15.145380000 | 26.078280000 |
| H | 37.563870000 | 14.706280000 | 26.030180000 |
| H | 42.415250000 | 13.320570000 | 22.493110000 |
| H | 41.719560000 | 11.949150000 | 21.556680000 |
| H | 41.978640000 | 11.799730000 | 23.331080000 |

|   |              |              |              |
|---|--------------|--------------|--------------|
| H | 33.291470000 | 21.438880000 | 27.792390000 |
| H | 32.744920000 | 22.273220000 | 23.561040000 |
| H | 32.908170000 | 19.830580000 | 23.065910000 |
| H | 32.886810000 | 17.918340000 | 27.659040000 |
| H | 33.596320000 | 19.287380000 | 28.605650000 |
| H | 34.625140000 | 18.280370000 | 27.516540000 |
| H | 32.080590000 | 23.753100000 | 26.705400000 |
| H | 32.817530000 | 24.116950000 | 25.100130000 |
| H | 33.859730000 | 23.866680000 | 26.544690000 |
| H | 26.056620000 | 22.557730000 | 15.973570000 |
| H | 29.485180000 | 21.986060000 | 13.365710000 |
| H | 30.840170000 | 21.244440000 | 15.329820000 |
| H | 27.165500000 | 20.866300000 | 18.771520000 |
| H | 26.205520000 | 22.315370000 | 18.284810000 |
| H | 27.840270000 | 22.497400000 | 19.041330000 |
| H | 26.036520000 | 21.901670000 | 13.117560000 |
| H | 27.422810000 | 22.810380000 | 12.418700000 |
| H | 26.248880000 | 23.638940000 | 13.504900000 |
| H | 36.732990000 | 23.136410000 | 25.692050000 |
| H | 37.037130000 | 19.341790000 | 27.794200000 |
| H | 37.042730000 | 18.141210000 | 25.601080000 |
| H | 37.604360000 | 21.957410000 | 22.477630000 |
| H | 36.746300000 | 23.278800000 | 23.372180000 |
| H | 35.820810000 | 21.947230000 | 22.575130000 |
| H | 36.965850000 | 23.160640000 | 28.084630000 |
| H | 37.561230000 | 21.691160000 | 28.941260000 |
| H | 35.803510000 | 21.939760000 | 28.707300000 |

|   |              |              |              |
|---|--------------|--------------|--------------|
| H | 33.351030000 | 6.321940000  | 23.673310000 |
| H | 34.798260000 | 6.646950000  | 19.585950000 |
| H | 35.446680000 | 9.023410000  | 20.022770000 |
| H | 34.906650000 | 9.195020000  | 24.981100000 |
| H | 33.498890000 | 8.077670000  | 25.197370000 |
| H | 33.276710000 | 9.708900000  | 24.455810000 |
| H | 34.474510000 | 4.187750000  | 21.360410000 |
| H | 33.108720000 | 4.771220000  | 20.356580000 |
| H | 32.884300000 | 4.528870000  | 22.127030000 |
| H | 40.594140000 | 13.658860000 | 14.580910000 |
| H | 37.402970000 | 10.748850000 | 14.072170000 |
| H | 35.718250000 | 12.546890000 | 14.487700000 |
| H | 38.653750000 | 16.578960000 | 14.336150000 |
| H | 40.182490000 | 15.898710000 | 15.030990000 |
| H | 38.740730000 | 16.185770000 | 16.078480000 |
| H | 41.105290000 | 11.406550000 | 13.668330000 |
| H | 39.793610000 | 10.197520000 | 13.408700000 |
| H | 40.427590000 | 10.499220000 | 15.061130000 |
